# Supplementary material
Source: MDPI journal article supplement (https://www.mdpi.com/2073-4395/11/10/2050)
Supplement: s1 [file s1]

Table S2. The plant growth under different flow rates

| Flow rate<br>(L/min) | Number | Leaf area<br>(cm <sup>2</sup> /plant) | Fresh weight (g/plant) |       | Dry weight (g/plant) |       | Root length<br>(cm/plant) |
|----------------------|--------|---------------------------------------|------------------------|-------|----------------------|-------|---------------------------|
|                      |        |                                       | Shoots                 | Roots | Shoots               | Roots |                           |
| 2                    | 2-1    | 726.86                                | 52.20                  | 6.32  | 5.65                 | 0.75  | 3225.64                   |
|                      | 2-2    | 562.54                                | 39.78                  | 6.42  | 5.01                 | 0.71  | 4021.54                   |
|                      | 2-3    | 694.77                                | 48.60                  | 9.34  | 5.38                 | 0.97  | 3764.21                   |
|                      | 2-4    | 592.21                                | 42.97                  | 6.74  | 4.06                 | 0.66  | 4271.95                   |
| 4                    | 4-1    | 799.47                                | 57.87                  | 12.89 | 5.50                 | 0.99  | 5149.74                   |
|                      | 4-2    | 648.07                                | 53.59                  | 9.48  | 5.58                 | 0.96  | 3977.46                   |
|                      | 4-3    | 747.01                                | 56.33                  | 15.59 | 4.64                 | 1.00  | 6645.47                   |
|                      | 4-4    | 710.87                                | 52.38                  | 10.73 | 5.10                 | 0.91  | 5069.91                   |
| 6                    | 6-1    | 509.98                                | 45.04                  | 10.89 | 4.66                 | 1.14  | 5236.36                   |
|                      | 6-2    | 561.72                                | 34.09                  | 7.52  | 4.16                 | 0.81  | 4030.27                   |
|                      | 6-3    | 510.52                                | 33.72                  | 6.80  | 4.88                 | 0.84  | 2651.82                   |
|                      | 6-4    | 537.28                                | 25.22                  | 8.23  | 4.71                 | 0.96  | 2761.04                   |
| 8                    | 8-1    | 424.81                                | 27.87                  | 5.95  | 3.57                 | 0.66  | 2438.28                   |
|                      | 8-2    | 333.12                                | 21.33                  | 5.88  | 3.49                 | 0.63  | 3525.58                   |
|                      | 8-3    | 420.15                                | 31.33                  | 6.04  | 3.86                 | 0.70  | 1601.20                   |
|                      | 8-4    | 394.58                                | 26.83                  | 5.47  | 3.70                 | 0.66  | 2803.28                   |
