# Supplementary material
Source: MDPI journal article supplement (https://www.mdpi.com/2073-4395/11/10/2050)
Supplement: s1 [file s1]

Table S1. The environment data of the cultivation room during the experiment

|                  | Humidity | Tempurature | Barometer    | Ultrasonic Anemometer |
|------------------|----------|-------------|--------------|-----------------------|
| Measurement Time | RH       | °C          | kPa Pressure | m/s                   |
| 2021/6/7 0:00    | 0.497    | 25.5        | 101.38       | 0.06                  |
| 2021/6/7 0:10    | 0.497    | 25.4        | 101.36       | 0.06                  |
| 2021/6/7 0:20    | 0.497    | 25.4        | 101.34       | 0.06                  |
| 2021/6/7 0:30    | 0.497    | 25.4        | 101.34       | 0.06                  |
| 2021/6/7 0:40    | 0.493    | 25.4        | 101.32       | 0.06                  |
| 2021/6/7 0:50    | 0.493    | 25.4        | 101.31       | 0.05                  |
| 2021/6/7 1:00    | 0.490    | 25.4        | 101.31       | 0.05                  |
| 2021/6/7 1:10    | 0.490    | 25.4        | 101.28       | 0.06                  |
| 2021/6/7 1:20    | 0.490    | 25.4        | 101.26       | 0.06                  |
| 2021/6/7 1:30    | 0.487    | 25.4        | 101.25       | 0.05                  |
| 2021/6/7 1:40    | 0.487    | 25.4        | 101.25       | 0.05                  |
| 2021/6/7 1:50    | 0.487    | 25.4        | 101.25       | 0.05                  |
| 2021/6/7 2:00    | 0.490    | 25.4        | 101.25       | 0.05                  |
| 2021/6/7 2:10    | 0.490    | 25.4        | 101.23       | 0.05                  |
| 2021/6/7 2:20    | 0.490    | 25.4        | 101.22       | 0.06                  |
| 2021/6/7 2:30    | 0.493    | 25.4        | 101.20       | 0.06                  |
| 2021/6/7 2:40    | 0.497    | 25.4        | 101.22       | 0.06                  |
| 2021/6/7 2:50    | 0.497    | 25.4        | 101.22       | 0.05                  |
| 2021/6/7 3:00    | 0.497    | 25.4        | 101.20       | 0.06                  |
| 2021/6/7 3:10    | 0.500    | 25.4        | 101.17       | 0.06                  |
| 2021/6/7 3:20    | 0.503    | 25.4        | 101.17       | 0.05                  |
| 2021/6/7 3:30    | 0.503    | 25.4        | 101.17       | 0.06                  |
| 2021/6/7 3:40    | 0.506    | 25.4        | 101.19       | 0.06                  |
| 2021/6/7 3:50    | 0.509    | 25.4        | 101.17       | 0.05                  |
| 2021/6/7 4:00    | 0.512    | 25.4        | 101.17       | 0.06                  |
| 2021/6/7 4:10    | 0.512    | 25.4        | 101.19       | 0.06                  |
| 2021/6/7 4:20    | 0.518    | 25.4        | 101.22       | 0.05                  |
| 2021/6/7 4:30    | 0.521    | 25.4        | 101.22       | 0.06                  |
| 2021/6/7 4:40    | 0.524    | 25.4        | 101.20       | 0.06                  |
| 2021/6/7 4:50    | 0.527    | 25.4        | 101.20       | 0.05                  |
| 2021/6/7 5:00    | 0.530    | 25.4        | 101.22       | 0.06                  |
| 2021/6/7 5:10    | 0.534    | 25.4        | 101.23       | 0.06                  |
| 2021/6/7 5:20    | 0.534    | 25.4        | 101.25       | 0.06                  |
| 2021/6/7 5:30    | 0.540    | 25.4        | 101.26       | 0.05                  |
| 2021/6/7 5:40    | 0.540    | 25.4        | 101.26       | 0.06                  |
| 2021/6/7 5:50    | 0.543    | 25.4        | 101.25       | 0.06                  |
| 2021/6/7 6:00    | 0.546    | 25.4        | 101.26       | 0.06                  |
| 2021/6/7 6:10    | 0.549    | 25.4        | 101.25       | 0.06                  |
| 2021/6/7 6:20    | 0.549    | 25.4        | 101.23       | 0.06                  |
| 2021/6/7 6:30    | 0.552    | 25.4        | 101.25       | 0.05                  |
| 2021/6/7 6:40    | 0.552    | 25.5        | 101.25       | 0.06                  |
| 2021/6/7 6:50    | 0.555    | 25.5        | 101.25       | 0.05                  |
| 2021/6/7 7:00    | 0.555    | 25.6        | 101.25       | 0.06                  |
| 2021/6/7 7:10    | 0.558    | 25.6        | 101.26       | 0.05                  |
| 2021/6/7 7:20    | 0.554    | 25.7        | 101.26       | 0.05                  |
| 2021/6/7 7:30    | 0.557    | 25.7        | 101.26       | 0.05                  |
| 2021/6/7 7:40    | 0.557    | 25.7        | 101.28       | 0.05                  |
| 2021/6/7 7:50    | 0.571    | 25.4        | 101.29       | 0.05                  |
| 2021/6/7 8:00    | 0.571    | 25.4        | 101.31       | 0.05                  |
| 2021/6/7 8:10    | 0.574    | 25.4        | 101.29       | 0.05                  |
| 2021/6/7 8:20    | 0.570    | 25.5        | 101.29       | 0.05                  |
| 2021/6/7 8:30    | 0.570    | 25.5        | 101.29       | 0.05                  |
| 2021/6/7 8:40    | 0.567    | 25.6        | 101.31       | 0.06                  |

|                |       |      |        |      |
|----------------|-------|------|--------|------|
| 2021/6/7 8:50  | 0.570 | 25.6 | 101.29 | 0.05 |
| 2021/6/7 9:00  | 0.573 | 25.6 | 101.29 | 0.06 |
| 2021/6/7 9:10  | 0.573 | 25.6 | 101.28 | 0.05 |
| 2021/6/7 9:20  | 0.573 | 25.6 | 101.29 | 0.05 |
| 2021/6/7 9:30  | 0.570 | 25.7 | 101.31 | 0.05 |
| 2021/6/7 9:40  | 0.573 | 25.7 | 101.32 | 0.05 |
| 2021/6/7 9:50  | 0.573 | 25.7 | 101.32 | 0.05 |
| 2021/6/7 10:00 | 0.573 | 25.7 | 101.34 | 0.06 |
| 2021/6/7 10:10 | 0.573 | 25.7 | 101.35 | 0.05 |
| 2021/6/7 10:20 | 0.576 | 25.7 | 101.36 | 0.06 |
| 2021/6/7 10:30 | 0.573 | 25.7 | 101.36 | 0.05 |
| 2021/6/7 10:40 | 0.576 | 25.7 | 101.35 | 0.05 |
| 2021/6/7 10:50 | 0.576 | 25.7 | 101.36 | 0.05 |
| 2021/6/7 11:00 | 0.576 | 25.7 | 101.35 | 0.06 |
| 2021/6/7 11:10 | 0.579 | 25.7 | 101.36 | 0.05 |
| 2021/6/7 11:20 | 0.579 | 25.7 | 101.36 | 0.05 |
| 2021/6/7 11:30 | 0.582 | 25.7 | 101.35 | 0.05 |
| 2021/6/7 11:40 | 0.582 | 25.7 | 101.34 | 0.05 |
| 2021/6/7 11:50 | 0.582 | 25.7 | 101.34 | 0.05 |
| 2021/6/7 12:00 | 0.582 | 25.7 | 101.32 | 0.05 |
| 2021/6/7 12:10 | 0.582 | 25.7 | 101.32 | 0.05 |
| 2021/6/7 12:20 | 0.585 | 25.7 | 101.31 | 0.05 |
| 2021/6/7 12:30 | 0.588 | 25.7 | 101.31 | 0.05 |
| 2021/6/7 12:40 | 0.588 | 25.7 | 101.31 | 0.05 |
| 2021/6/7 12:50 | 0.591 | 25.7 | 101.31 | 0.05 |
| 2021/6/7 13:00 | 0.591 | 25.7 | 101.32 | 0.05 |
| 2021/6/7 13:10 | 0.591 | 25.7 | 101.32 | 0.05 |
| 2021/6/7 13:20 | 0.591 | 25.7 | 101.31 | 0.05 |
| 2021/6/7 13:30 | 0.591 | 25.7 | 101.31 | 0.05 |
| 2021/6/7 13:40 | 0.594 | 25.6 | 101.31 | 0.05 |
| 2021/6/7 13:50 | 0.591 | 25.6 | 101.29 | 0.05 |
| 2021/6/7 14:00 | 0.594 | 25.6 | 101.29 | 0.05 |
| 2021/6/7 14:10 | 0.600 | 25.6 | 101.28 | 0.04 |
| 2021/6/7 14:20 | 0.594 | 25.7 | 101.26 | 0.05 |
| 2021/6/7 14:30 | 0.600 | 25.6 | 101.25 | 0.05 |
| 2021/6/7 14:40 | 0.597 | 25.6 | 101.25 | 0.05 |
| 2021/6/7 14:50 | 0.603 | 25.6 | 101.23 | 0.06 |
| 2021/6/7 15:00 | 0.603 | 25.6 | 101.22 | 0.06 |
| 2021/6/7 15:10 | 0.603 | 25.6 | 101.22 | 0.05 |
| 2021/6/7 15:20 | 0.603 | 25.7 | 101.23 | 0.05 |
| 2021/6/7 15:30 | 0.597 | 25.7 | 101.25 | 0.05 |
| 2021/6/7 15:40 | 0.600 | 25.7 | 101.23 | 0.05 |
| 2021/6/7 15:50 | 0.603 | 25.6 | 101.25 | 0.05 |
| 2021/6/7 16:00 | 0.603 | 25.6 | 101.25 | 0.05 |
| 2021/6/7 16:10 | 0.600 | 25.7 | 101.25 | 0.05 |
| 2021/6/7 16:20 | 0.603 | 25.7 | 101.25 | 0.05 |
| 2021/6/7 16:30 | 0.603 | 25.7 | 101.25 | 0.06 |
| 2021/6/7 16:40 | 0.603 | 25.7 | 101.25 | 0.04 |
| 2021/6/7 16:50 | 0.594 | 25.7 | 101.22 | 0.05 |
| 2021/6/7 17:00 | 0.607 | 25.5 | 101.19 | 0.05 |
| 2021/6/7 17:10 | 0.611 | 25.4 | 101.16 | 0.05 |
| 2021/6/7 17:20 | 0.607 | 25.5 | 101.14 | 0.06 |
| 2021/6/7 17:30 | 0.607 | 25.6 | 101.13 | 0.05 |
| 2021/6/7 17:40 | 0.607 | 25.6 | 101.14 | 0.06 |
| 2021/6/7 17:50 | 0.607 | 25.6 | 101.13 | 0.05 |
| 2021/6/7 18:00 | 0.600 | 25.7 | 101.13 | 0.05 |

|                |       |      |        |      |
|----------------|-------|------|--------|------|
| 2021/6/7 18:10 | 0.600 | 25.6 | 101.13 | 0.05 |
| 2021/6/7 18:20 | 0.600 | 25.7 | 101.13 | 0.04 |
| 2021/6/7 18:30 | 0.607 | 25.6 | 101.16 | 0.05 |
| 2021/6/7 18:40 | 0.607 | 25.6 | 101.19 | 0.05 |
| 2021/6/7 18:50 | 0.603 | 25.6 | 101.20 | 0.06 |
| 2021/6/7 19:00 | 0.600 | 25.6 | 101.20 | 0.04 |
| 2021/6/7 19:10 | 0.604 | 25.5 | 101.22 | 0.06 |
| 2021/6/7 19:20 | 0.601 | 25.5 | 101.22 | 0.05 |
| 2021/6/7 19:30 | 0.604 | 25.5 | 101.23 | 0.04 |
| 2021/6/7 19:40 | 0.604 | 25.5 | 101.23 | 0.07 |
| 2021/6/7 19:50 | 0.601 | 25.5 | 101.25 | 0.05 |
| 2021/6/7 20:00 | 0.604 | 25.5 | 101.26 | 0.05 |
| 2021/6/7 20:10 | 0.604 | 25.5 | 101.26 | 0.06 |
| 2021/6/7 20:20 | 0.604 | 25.5 | 101.26 | 0.05 |
| 2021/6/7 20:30 | 0.604 | 25.5 | 101.26 | 0.05 |
| 2021/6/7 20:40 | 0.604 | 25.5 | 101.26 | 0.05 |
| 2021/6/7 20:50 | 0.601 | 25.5 | 101.31 | 0.05 |
| 2021/6/7 21:00 | 0.604 | 25.5 | 101.28 | 0.05 |
| 2021/6/7 21:10 | 0.604 | 25.5 | 101.29 | 0.07 |
| 2021/6/7 21:20 | 0.601 | 25.5 | 101.28 | 0.06 |
| 2021/6/7 21:30 | 0.607 | 25.5 | 101.28 | 0.04 |
| 2021/6/7 21:40 | 0.604 | 25.5 | 101.28 | 0.06 |
| 2021/6/7 21:50 | 0.604 | 25.5 | 101.25 | 0.06 |
| 2021/6/7 22:00 | 0.604 | 25.5 | 101.25 | 0.07 |
| 2021/6/7 22:10 | 0.604 | 25.5 | 101.25 | 0.06 |
| 2021/6/7 22:20 | 0.607 | 25.5 | 101.26 | 0.06 |
| 2021/6/7 22:30 | 0.607 | 25.5 | 101.23 | 0.05 |
| 2021/6/7 22:40 | 0.607 | 25.5 | 101.23 | 0.06 |
| 2021/6/7 22:50 | 0.607 | 25.5 | 101.23 | 0.06 |
| 2021/6/7 23:00 | 0.610 | 25.5 | 101.28 | 0.06 |
| 2021/6/7 23:10 | 0.607 | 25.5 | 101.29 | 0.06 |
| 2021/6/7 23:20 | 0.610 | 25.5 | 101.31 | 0.06 |
| 2021/6/7 23:30 | 0.610 | 25.5 | 101.28 | 0.06 |
| 2021/6/7 23:40 | 0.607 | 25.5 | 101.25 | 0.05 |
| 2021/6/7 23:50 | 0.613 | 25.5 | 101.25 | 0.05 |
| 2021/6/8 0:00  | 0.610 | 25.5 | 101.26 | 0.06 |
| 2021/6/8 0:10  | 0.610 | 25.5 | 101.26 | 0.06 |
| 2021/6/8 0:20  | 0.610 | 25.5 | 101.28 | 0.06 |
| 2021/6/8 0:30  | 0.613 | 25.5 | 101.29 | 0.06 |
| 2021/6/8 0:40  | 0.613 | 25.5 | 101.31 | 0.06 |
| 2021/6/8 0:50  | 0.613 | 25.5 | 101.31 | 0.07 |
| 2021/6/8 1:00  | 0.613 | 25.5 | 101.31 | 0.06 |
| 2021/6/8 1:10  | 0.613 | 25.5 | 101.31 | 0.06 |
| 2021/6/8 1:20  | 0.613 | 25.5 | 101.34 | 0.06 |
| 2021/6/8 1:30  | 0.613 | 25.5 | 101.34 | 0.06 |
| 2021/6/8 1:40  | 0.613 | 25.5 | 101.32 | 0.06 |
| 2021/6/8 1:50  | 0.613 | 25.5 | 101.36 | 0.05 |
| 2021/6/8 2:00  | 0.613 | 25.5 | 101.35 | 0.06 |
| 2021/6/8 2:10  | 0.613 | 25.5 | 101.35 | 0.05 |
| 2021/6/8 2:20  | 0.613 | 25.5 | 101.35 | 0.06 |
| 2021/6/8 2:30  | 0.613 | 25.5 | 101.36 | 0.06 |
| 2021/6/8 2:40  | 0.613 | 25.5 | 101.36 | 0.06 |
| 2021/6/8 2:50  | 0.613 | 25.5 | 101.38 | 0.06 |
| 2021/6/8 3:00  | 0.613 | 25.5 | 101.35 | 0.06 |
| 2021/6/8 3:10  | 0.613 | 25.5 | 101.32 | 0.07 |
| 2021/6/8 3:20  | 0.613 | 25.5 | 101.31 | 0.06 |

|                |       |      |        |      |
|----------------|-------|------|--------|------|
| 2021/6/8 3:30  | 0.613 | 25.5 | 101.34 | 0.06 |
| 2021/6/8 3:40  | 0.613 | 25.5 | 101.31 | 0.07 |
| 2021/6/8 3:50  | 0.613 | 25.5 | 101.29 | 0.06 |
| 2021/6/8 4:00  | 0.613 | 25.5 | 101.31 | 0.07 |
| 2021/6/8 4:10  | 0.613 | 25.5 | 101.31 | 0.06 |
| 2021/6/8 4:20  | 0.616 | 25.5 | 101.31 | 0.07 |
| 2021/6/8 4:30  | 0.613 | 25.5 | 101.32 | 0.06 |
| 2021/6/8 4:40  | 0.616 | 25.5 | 101.32 | 0.06 |
| 2021/6/8 4:50  | 0.616 | 25.5 | 101.31 | 0.07 |
| 2021/6/8 5:00  | 0.616 | 25.5 | 101.32 | 0.06 |
| 2021/6/8 5:10  | 0.616 | 25.5 | 101.34 | 0.06 |
| 2021/6/8 5:20  | 0.616 | 25.5 | 101.34 | 0.06 |
| 2021/6/8 5:30  | 0.619 | 25.5 | 101.38 | 0.06 |
| 2021/6/8 5:40  | 0.619 | 25.5 | 101.41 | 0.06 |
| 2021/6/8 5:50  | 0.619 | 25.5 | 101.39 | 0.06 |
| 2021/6/8 6:00  | 0.622 | 25.5 | 101.39 | 0.06 |
| 2021/6/8 6:10  | 0.622 | 25.5 | 101.42 | 0.06 |
| 2021/6/8 6:20  | 0.622 | 25.5 | 101.44 | 0.06 |
| 2021/6/8 6:30  | 0.625 | 25.5 | 101.44 | 0.05 |
| 2021/6/8 6:40  | 0.625 | 25.5 | 101.42 | 0.05 |
| 2021/6/8 6:50  | 0.629 | 25.5 | 101.44 | 0.06 |
| 2021/6/8 7:00  | 0.625 | 25.6 | 101.44 | 0.05 |
| 2021/6/8 7:10  | 0.631 | 25.6 | 101.42 | 0.05 |
| 2021/6/8 7:20  | 0.627 | 25.7 | 101.39 | 0.06 |
| 2021/6/8 7:30  | 0.630 | 25.7 | 101.36 | 0.06 |
| 2021/6/8 7:40  | 0.630 | 25.7 | 101.34 | 0.05 |
| 2021/6/8 7:50  | 0.633 | 25.7 | 101.35 | 0.05 |
| 2021/6/8 8:00  | 0.633 | 25.7 | 101.35 | 0.06 |
| 2021/6/8 8:10  | 0.636 | 25.7 | 101.39 | 0.05 |
| 2021/6/8 8:20  | 0.633 | 25.7 | 101.39 | 0.05 |
| 2021/6/8 8:30  | 0.644 | 25.5 | 101.39 | 0.05 |
| 2021/6/8 8:40  | 0.644 | 25.5 | 101.39 | 0.05 |
| 2021/6/8 8:50  | 0.647 | 25.5 | 101.41 | 0.05 |
| 2021/6/8 9:00  | 0.643 | 25.6 | 101.39 | 0.05 |
| 2021/6/8 9:10  | 0.643 | 25.6 | 101.39 | 0.06 |
| 2021/6/8 9:20  | 0.646 | 25.6 | 101.41 | 0.05 |
| 2021/6/8 9:30  | 0.649 | 25.6 | 101.39 | 0.05 |
| 2021/6/8 9:40  | 0.645 | 25.7 | 101.38 | 0.05 |
| 2021/6/8 9:50  | 0.645 | 25.7 | 101.36 | 0.05 |
| 2021/6/8 10:00 | 0.651 | 25.7 | 101.39 | 0.05 |
| 2021/6/8 10:10 | 0.648 | 25.7 | 101.38 | 0.06 |
| 2021/6/8 10:20 | 0.654 | 25.7 | 101.35 | 0.05 |
| 2021/6/8 10:30 | 0.657 | 25.7 | 101.35 | 0.05 |
| 2021/6/8 10:40 | 0.657 | 25.7 | 101.34 | 0.05 |
| 2021/6/8 10:50 | 0.657 | 25.7 | 101.34 | 0.05 |
| 2021/6/8 11:00 | 0.657 | 25.7 | 101.34 | 0.06 |
| 2021/6/8 11:10 | 0.657 | 25.7 | 101.32 | 0.05 |
| 2021/6/8 11:20 | 0.667 | 25.7 | 101.31 | 0.05 |
| 2021/6/8 11:30 | 0.664 | 25.7 | 101.31 | 0.06 |
| 2021/6/8 11:40 | 0.667 | 25.7 | 101.31 | 0.05 |
| 2021/6/8 11:50 | 0.667 | 25.7 | 101.31 | 0.05 |
| 2021/6/8 12:00 | 0.664 | 25.7 | 101.31 | 0.05 |
| 2021/6/8 12:10 | 0.667 | 25.7 | 101.31 | 0.05 |
| 2021/6/8 12:20 | 0.664 | 25.7 | 101.31 | 0.05 |
| 2021/6/8 12:30 | 0.664 | 25.7 | 101.29 | 0.05 |
| 2021/6/8 12:40 | 0.667 | 25.7 | 101.28 | 0.05 |

|                |       |      |        |      |
|----------------|-------|------|--------|------|
| 2021/6/8 12:50 | 0.670 | 25.7 | 101.26 | 0.06 |
| 2021/6/8 13:00 | 0.667 | 25.7 | 101.26 | 0.05 |
| 2021/6/8 13:10 | 0.670 | 25.7 | 101.25 | 0.05 |
| 2021/6/8 13:20 | 0.664 | 25.7 | 101.23 | 0.05 |
| 2021/6/8 13:30 | 0.667 | 25.7 | 101.22 | 0.05 |
| 2021/6/8 13:40 | 0.673 | 25.7 | 101.20 | 0.05 |
| 2021/6/8 13:50 | 0.664 | 25.7 | 101.20 | 0.06 |
| 2021/6/8 14:00 | 0.673 | 25.7 | 101.19 | 0.05 |
| 2021/6/8 14:10 | 0.667 | 25.7 | 101.19 | 0.06 |
| 2021/6/8 14:20 | 0.673 | 25.7 | 101.19 | 0.05 |
| 2021/6/8 14:30 | 0.673 | 25.7 | 101.19 | 0.04 |
| 2021/6/8 14:40 | 0.673 | 25.7 | 101.19 | 0.06 |
| 2021/6/8 14:50 | 0.676 | 25.7 | 101.20 | 0.05 |
| 2021/6/8 15:00 | 0.673 | 25.7 | 101.20 | 0.05 |
| 2021/6/8 15:10 | 0.676 | 25.7 | 101.19 | 0.06 |
| 2021/6/8 15:20 | 0.672 | 25.8 | 101.19 | 0.05 |
| 2021/6/8 15:30 | 0.669 | 25.8 | 101.19 | 0.05 |
| 2021/6/8 15:40 | 0.672 | 25.8 | 101.19 | 0.05 |
| 2021/6/8 15:50 | 0.669 | 25.8 | 101.19 | 0.06 |
| 2021/6/8 16:00 | 0.675 | 25.8 | 101.19 | 0.05 |
| 2021/6/8 16:10 | 0.675 | 25.8 | 101.17 | 0.06 |
| 2021/6/8 16:20 | 0.675 | 25.8 | 101.17 | 0.05 |
| 2021/6/8 16:30 | 0.676 | 25.7 | 101.16 | 0.05 |
| 2021/6/8 16:40 | 0.682 | 25.7 | 101.16 | 0.06 |
| 2021/6/8 16:50 | 0.676 | 25.7 | 101.16 | 0.06 |
| 2021/6/8 17:00 | 0.676 | 25.7 | 101.14 | 0.06 |
| 2021/6/8 17:10 | 0.679 | 25.7 | 101.14 | 0.06 |
| 2021/6/8 17:20 | 0.667 | 25.7 | 101.14 | 0.07 |
| 2021/6/8 17:30 | 0.681 | 25.5 | 101.14 | 0.05 |
| 2021/6/8 17:40 | 0.684 | 25.5 | 101.14 | 0.05 |
| 2021/6/8 17:50 | 0.683 | 25.6 | 101.14 | 0.05 |
| 2021/6/8 18:00 | 0.683 | 25.6 | 101.14 | 0.06 |
| 2021/6/8 18:10 | 0.683 | 25.6 | 101.14 | 0.05 |
| 2021/6/8 18:20 | 0.682 | 25.7 | 101.16 | 0.06 |
| 2021/6/8 18:30 | 0.676 | 25.7 | 101.16 | 0.05 |
| 2021/6/8 18:40 | 0.685 | 25.7 | 101.16 | 0.06 |
| 2021/6/8 18:50 | 0.686 | 25.6 | 101.16 | 0.06 |
| 2021/6/8 19:00 | 0.689 | 25.6 | 101.16 | 0.05 |
| 2021/6/8 19:10 | 0.686 | 25.6 | 101.17 | 0.07 |
| 2021/6/8 19:20 | 0.683 | 25.6 | 101.17 | 0.05 |
| 2021/6/8 19:30 | 0.686 | 25.6 | 101.17 | 0.06 |
| 2021/6/8 19:40 | 0.686 | 25.6 | 101.17 | 0.06 |
| 2021/6/8 19:50 | 0.680 | 25.6 | 101.16 | 0.06 |
| 2021/6/8 20:00 | 0.690 | 25.5 | 101.16 | 0.06 |
| 2021/6/8 20:10 | 0.690 | 25.5 | 101.14 | 0.06 |
| 2021/6/8 20:20 | 0.687 | 25.5 | 101.14 | 0.07 |
| 2021/6/8 20:30 | 0.687 | 25.5 | 101.14 | 0.06 |
| 2021/6/8 20:40 | 0.687 | 25.5 | 101.14 | 0.07 |
| 2021/6/8 20:50 | 0.687 | 25.5 | 101.14 | 0.07 |
| 2021/6/8 21:00 | 0.687 | 25.5 | 101.14 | 0.07 |
| 2021/6/8 21:10 | 0.684 | 25.5 | 101.14 | 0.07 |
| 2021/6/8 21:20 | 0.681 | 25.5 | 101.16 | 0.05 |
| 2021/6/8 21:30 | 0.687 | 25.5 | 101.16 | 0.06 |
| 2021/6/8 21:40 | 0.684 | 25.5 | 101.16 | 0.07 |
| 2021/6/8 21:50 | 0.684 | 25.5 | 101.16 | 0.06 |
| 2021/6/8 22:00 | 0.684 | 25.5 | 101.14 | 0.07 |

|                |       |      |        |      |
|----------------|-------|------|--------|------|
| 2021/6/8 22:10 | 0.684 | 25.5 | 101.13 | 0.06 |
| 2021/6/8 22:20 | 0.684 | 25.5 | 101.12 | 0.08 |
| 2021/6/8 22:30 | 0.684 | 25.5 | 101.12 | 0.07 |
| 2021/6/8 22:40 | 0.684 | 25.5 | 101.13 | 0.07 |
| 2021/6/8 22:50 | 0.681 | 25.5 | 101.13 | 0.08 |
| 2021/6/8 23:00 | 0.681 | 25.5 | 101.12 | 0.07 |
| 2021/6/8 23:10 | 0.684 | 25.5 | 101.13 | 0.07 |
| 2021/6/8 23:20 | 0.681 | 25.5 | 101.12 | 0.07 |
| 2021/6/8 23:30 | 0.681 | 25.5 | 101.12 | 0.06 |
| 2021/6/8 23:40 | 0.681 | 25.5 | 101.12 | 0.07 |
| 2021/6/8 23:50 | 0.681 | 25.5 | 101.12 | 0.07 |
| 2021/6/9 0:00  | 0.681 | 25.5 | 101.12 | 0.07 |
| 2021/6/9 0:10  | 0.681 | 25.5 | 101.10 | 0.07 |
| 2021/6/9 0:20  | 0.681 | 25.5 | 101.10 | 0.07 |
| 2021/6/9 0:30  | 0.681 | 25.5 | 101.09 | 0.07 |
| 2021/6/9 0:40  | 0.681 | 25.5 | 101.09 | 0.07 |
| 2021/6/9 0:50  | 0.684 | 25.5 | 101.09 | 0.07 |
| 2021/6/9 1:00  | 0.681 | 25.5 | 101.09 | 0.07 |
| 2021/6/9 1:10  | 0.684 | 25.5 | 101.07 | 0.07 |
| 2021/6/9 1:20  | 0.687 | 25.5 | 101.09 | 0.07 |
| 2021/6/9 1:30  | 0.687 | 25.5 | 101.12 | 0.08 |
| 2021/6/9 1:40  | 0.687 | 25.5 | 101.12 | 0.06 |
| 2021/6/9 1:50  | 0.690 | 25.5 | 101.10 | 0.07 |
| 2021/6/9 2:00  | 0.690 | 25.5 | 101.09 | 0.07 |
| 2021/6/9 2:10  | 0.693 | 25.5 | 101.07 | 0.07 |
| 2021/6/9 2:20  | 0.693 | 25.5 | 101.06 | 0.07 |
| 2021/6/9 2:30  | 0.693 | 25.5 | 101.03 | 0.07 |
| 2021/6/9 2:40  | 0.696 | 25.5 | 101.03 | 0.07 |
| 2021/6/9 2:50  | 0.696 | 25.5 | 101.04 | 0.07 |
| 2021/6/9 3:00  | 0.696 | 25.5 | 101.03 | 0.07 |
| 2021/6/9 3:10  | 0.699 | 25.5 | 101.01 | 0.07 |
| 2021/6/9 3:20  | 0.699 | 25.5 | 101.00 | 0.07 |
| 2021/6/9 3:30  | 0.699 | 25.5 | 100.98 | 0.08 |
| 2021/6/9 3:40  | 0.699 | 25.5 | 100.98 | 0.07 |
| 2021/6/9 3:50  | 0.702 | 25.5 | 100.98 | 0.07 |
| 2021/6/9 4:00  | 0.702 | 25.5 | 100.97 | 0.08 |
| 2021/6/9 4:10  | 0.699 | 25.5 | 100.97 | 0.08 |
| 2021/6/9 4:20  | 0.702 | 25.5 | 100.97 | 0.07 |
| 2021/6/9 4:30  | 0.702 | 25.5 | 100.97 | 0.07 |
| 2021/6/9 4:40  | 0.702 | 25.5 | 100.97 | 0.08 |
| 2021/6/9 4:50  | 0.699 | 25.5 | 100.95 | 0.07 |
| 2021/6/9 5:00  | 0.706 | 25.4 | 100.95 | 0.07 |
| 2021/6/9 5:10  | 0.706 | 25.4 | 100.97 | 0.07 |
| 2021/6/9 5:20  | 0.705 | 25.5 | 100.97 | 0.07 |
| 2021/6/9 5:30  | 0.702 | 25.5 | 100.97 | 0.07 |
| 2021/6/9 5:40  | 0.706 | 25.4 | 100.97 | 0.07 |
| 2021/6/9 5:50  | 0.709 | 25.4 | 100.97 | 0.06 |
| 2021/6/9 6:00  | 0.709 | 25.4 | 100.98 | 0.07 |
| 2021/6/9 6:10  | 0.706 | 25.4 | 101.00 | 0.07 |
| 2021/6/9 6:20  | 0.709 | 25.4 | 100.98 | 0.06 |
| 2021/6/9 6:30  | 0.702 | 25.5 | 101.00 | 0.06 |
| 2021/6/9 6:40  | 0.705 | 25.5 | 101.00 | 0.06 |
| 2021/6/9 6:50  | 0.705 | 25.5 | 101.00 | 0.05 |
| 2021/6/9 7:00  | 0.698 | 25.6 | 101.01 | 0.06 |
| 2021/6/9 7:10  | 0.704 | 25.6 | 101.01 | 0.06 |
| 2021/6/9 7:20  | 0.707 | 25.6 | 101.03 | 0.05 |

|                |       |      |        |      |
|----------------|-------|------|--------|------|
| 2021/6/9 7:30  | 0.703 | 25.7 | 101.04 | 0.06 |
| 2021/6/9 7:40  | 0.703 | 25.7 | 101.04 | 0.07 |
| 2021/6/9 7:50  | 0.703 | 25.7 | 101.06 | 0.05 |
| 2021/6/9 8:00  | 0.706 | 25.7 | 101.07 | 0.07 |
| 2021/6/9 8:10  | 0.706 | 25.7 | 101.07 | 0.05 |
| 2021/6/9 8:20  | 0.706 | 25.7 | 101.09 | 0.06 |
| 2021/6/9 8:30  | 0.712 | 25.7 | 101.09 | 0.06 |
| 2021/6/9 8:40  | 0.712 | 25.7 | 101.10 | 0.06 |
| 2021/6/9 8:50  | 0.711 | 25.8 | 101.10 | 0.05 |
| 2021/6/9 9:00  | 0.715 | 25.7 | 101.06 | 0.07 |
| 2021/6/9 9:10  | 0.718 | 25.7 | 101.03 | 0.05 |
| 2021/6/9 9:20  | 0.714 | 25.8 | 101.01 | 0.07 |
| 2021/6/9 9:30  | 0.714 | 25.8 | 101.01 | 0.05 |
| 2021/6/9 9:40  | 0.711 | 25.8 | 101.01 | 0.07 |
| 2021/6/9 9:50  | 0.704 | 25.6 | 101.00 | 0.07 |
| 2021/6/9 10:00 | 0.719 | 25.6 | 100.97 | 0.06 |
| 2021/6/9 10:10 | 0.722 | 25.6 | 100.95 | 0.06 |
| 2021/6/9 10:20 | 0.722 | 25.6 | 100.94 | 0.07 |
| 2021/6/9 10:30 | 0.721 | 25.7 | 100.91 | 0.05 |
| 2021/6/9 10:40 | 0.715 | 25.7 | 100.90 | 0.07 |
| 2021/6/9 10:50 | 0.721 | 25.7 | 100.88 | 0.06 |
| 2021/6/9 11:00 | 0.721 | 25.7 | 100.87 | 0.06 |
| 2021/6/9 11:10 | 0.718 | 25.7 | 100.84 | 0.06 |
| 2021/6/9 11:20 | 0.727 | 25.7 | 100.82 | 0.07 |
| 2021/6/9 11:30 | 0.723 | 25.8 | 100.84 | 0.05 |
| 2021/6/9 11:40 | 0.724 | 25.7 | 100.85 | 0.07 |
| 2021/6/9 11:50 | 0.730 | 25.7 | 100.85 | 0.06 |
| 2021/6/9 12:00 | 0.726 | 25.8 | 100.84 | 0.06 |
| 2021/6/9 12:10 | 0.730 | 25.7 | 100.81 | 0.06 |
| 2021/6/9 12:20 | 0.729 | 25.8 | 100.81 | 0.07 |
| 2021/6/9 12:30 | 0.726 | 25.8 | 100.82 | 0.06 |
| 2021/6/9 12:40 | 0.726 | 25.8 | 100.82 | 0.07 |
| 2021/6/9 12:50 | 0.730 | 25.7 | 100.82 | 0.06 |
| 2021/6/9 13:00 | 0.733 | 25.7 | 100.82 | 0.06 |
| 2021/6/9 13:10 | 0.729 | 25.8 | 100.82 | 0.07 |
| 2021/6/9 13:20 | 0.736 | 25.7 | 100.82 | 0.06 |
| 2021/6/9 13:30 | 0.736 | 25.7 | 100.82 | 0.07 |
| 2021/6/9 13:40 | 0.730 | 25.7 | 100.81 | 0.06 |
| 2021/6/9 13:50 | 0.729 | 25.8 | 100.79 | 0.06 |
| 2021/6/9 14:00 | 0.730 | 25.7 | 100.79 | 0.06 |
| 2021/6/9 14:10 | 0.736 | 25.7 | 100.79 | 0.06 |
| 2021/6/9 14:20 | 0.729 | 25.8 | 100.78 | 0.07 |
| 2021/6/9 14:30 | 0.730 | 25.7 | 100.75 | 0.07 |
| 2021/6/9 14:40 | 0.736 | 25.7 | 100.75 | 0.06 |
| 2021/6/9 14:50 | 0.730 | 25.7 | 100.73 | 0.07 |
| 2021/6/9 15:00 | 0.736 | 25.7 | 100.72 | 0.06 |
| 2021/6/9 15:10 | 0.730 | 25.7 | 100.72 | 0.07 |
| 2021/6/9 15:20 | 0.730 | 25.7 | 100.70 | 0.06 |
| 2021/6/9 15:30 | 0.739 | 25.7 | 100.70 | 0.07 |
| 2021/6/9 15:40 | 0.730 | 25.7 | 100.68 | 0.06 |
| 2021/6/9 15:50 | 0.733 | 25.7 | 100.68 | 0.06 |
| 2021/6/9 16:00 | 0.730 | 25.7 | 100.66 | 0.06 |
| 2021/6/9 16:10 | 0.736 | 25.7 | 100.66 | 0.06 |
| 2021/6/9 16:20 | 0.727 | 25.7 | 100.66 | 0.06 |
| 2021/6/9 16:30 | 0.733 | 25.7 | 100.66 | 0.06 |
| 2021/6/9 16:40 | 0.733 | 25.7 | 100.65 | 0.06 |

|                |       |      |        |      |
|----------------|-------|------|--------|------|
| 2021/6/9 16:50 | 0.727 | 25.7 | 100.65 | 0.07 |
| 2021/6/9 17:00 | 0.733 | 25.7 | 100.63 | 0.06 |
| 2021/6/9 17:10 | 0.729 | 25.8 | 100.62 | 0.06 |
| 2021/6/9 17:20 | 0.729 | 25.8 | 100.62 | 0.07 |
| 2021/6/9 17:30 | 0.729 | 25.8 | 100.62 | 0.07 |
| 2021/6/9 17:40 | 0.723 | 25.8 | 100.62 | 0.07 |
| 2021/6/9 17:50 | 0.729 | 25.8 | 100.62 | 0.07 |
| 2021/6/9 18:00 | 0.726 | 25.8 | 100.60 | 0.07 |
| 2021/6/9 18:10 | 0.729 | 25.8 | 100.62 | 0.06 |
| 2021/6/9 18:20 | 0.729 | 25.8 | 100.63 | 0.06 |
| 2021/6/9 18:30 | 0.733 | 25.7 | 100.63 | 0.05 |
| 2021/6/9 18:40 | 0.728 | 25.6 | 100.65 | 0.07 |
| 2021/6/9 18:50 | 0.736 | 25.5 | 100.65 | 0.07 |
| 2021/6/9 19:00 | 0.743 | 25.4 | 100.65 | 0.06 |
| 2021/6/9 19:10 | 0.743 | 25.4 | 100.66 | 0.08 |
| 2021/6/9 19:20 | 0.743 | 25.4 | 100.68 | 0.06 |
| 2021/6/9 19:30 | 0.742 | 25.5 | 100.68 | 0.06 |
| 2021/6/9 19:40 | 0.739 | 25.5 | 100.68 | 0.07 |
| 2021/6/9 19:50 | 0.736 | 25.5 | 100.69 | 0.06 |
| 2021/6/9 20:00 | 0.733 | 25.5 | 100.69 | 0.05 |
| 2021/6/9 20:10 | 0.736 | 25.5 | 100.72 | 0.07 |
| 2021/6/9 20:20 | 0.736 | 25.5 | 100.73 | 0.06 |
| 2021/6/9 20:30 | 0.736 | 25.5 | 100.75 | 0.07 |
| 2021/6/9 20:40 | 0.733 | 25.5 | 100.75 | 0.07 |
| 2021/6/9 20:50 | 0.736 | 25.5 | 100.73 | 0.07 |
| 2021/6/9 21:00 | 0.739 | 25.5 | 100.72 | 0.06 |
| 2021/6/9 21:10 | 0.736 | 25.5 | 100.72 | 0.07 |
| 2021/6/9 21:20 | 0.736 | 25.5 | 100.70 | 0.07 |
| 2021/6/9 21:30 | 0.736 | 25.5 | 100.72 | 0.06 |
| 2021/6/9 21:40 | 0.736 | 25.5 | 100.70 | 0.07 |
| 2021/6/9 21:50 | 0.733 | 25.5 | 100.72 | 0.07 |
| 2021/6/9 22:00 | 0.736 | 25.5 | 100.73 | 0.07 |
| 2021/6/9 22:10 | 0.733 | 25.5 | 100.73 | 0.07 |
| 2021/6/9 22:20 | 0.733 | 25.5 | 100.72 | 0.07 |
| 2021/6/9 22:30 | 0.733 | 25.5 | 100.72 | 0.06 |
| 2021/6/9 22:40 | 0.733 | 25.5 | 100.73 | 0.07 |
| 2021/6/9 22:50 | 0.733 | 25.5 | 100.73 | 0.06 |
| 2021/6/9 23:00 | 0.733 | 25.5 | 100.73 | 0.07 |
| 2021/6/9 23:10 | 0.730 | 25.5 | 100.70 | 0.08 |
| 2021/6/9 23:20 | 0.730 | 25.5 | 100.69 | 0.06 |
| 2021/6/9 23:30 | 0.730 | 25.5 | 100.69 | 0.06 |
| 2021/6/9 23:40 | 0.730 | 25.5 | 100.66 | 0.07 |
| 2021/6/9 23:50 | 0.727 | 25.5 | 100.62 | 0.07 |
| 2021/6/10 0:00 | 0.727 | 25.5 | 100.60 | 0.06 |
| 2021/6/10 0:10 | 0.727 | 25.5 | 100.60 | 0.06 |
| 2021/6/10 0:20 | 0.727 | 25.5 | 100.62 | 0.07 |
| 2021/6/10 0:30 | 0.724 | 25.5 | 100.62 | 0.07 |
| 2021/6/10 0:40 | 0.724 | 25.5 | 100.60 | 0.06 |
| 2021/6/10 0:50 | 0.727 | 25.5 | 100.60 | 0.07 |
| 2021/6/10 1:00 | 0.721 | 25.5 | 100.59 | 0.07 |
| 2021/6/10 1:10 | 0.721 | 25.5 | 100.62 | 0.07 |
| 2021/6/10 1:20 | 0.724 | 25.5 | 100.63 | 0.06 |
| 2021/6/10 1:30 | 0.724 | 25.5 | 100.62 | 0.07 |
| 2021/6/10 1:40 | 0.721 | 25.5 | 100.60 | 0.07 |
| 2021/6/10 1:50 | 0.722 | 25.4 | 100.60 | 0.07 |
| 2021/6/10 2:00 | 0.725 | 25.4 | 100.57 | 0.07 |

|                 |       |      |        |      |
|-----------------|-------|------|--------|------|
| 2021/6/10 2:10  | 0.725 | 25.4 | 100.56 | 0.07 |
| 2021/6/10 2:20  | 0.725 | 25.4 | 100.54 | 0.06 |
| 2021/6/10 2:30  | 0.725 | 25.4 | 100.54 | 0.07 |
| 2021/6/10 2:40  | 0.722 | 25.4 | 100.53 | 0.07 |
| 2021/6/10 2:50  | 0.722 | 25.4 | 100.53 | 0.06 |
| 2021/6/10 3:00  | 0.722 | 25.4 | 100.56 | 0.07 |
| 2021/6/10 3:10  | 0.722 | 25.4 | 100.54 | 0.07 |
| 2021/6/10 3:20  | 0.719 | 25.4 | 100.54 | 0.08 |
| 2021/6/10 3:30  | 0.719 | 25.4 | 100.54 | 0.07 |
| 2021/6/10 3:40  | 0.719 | 25.4 | 100.56 | 0.07 |
| 2021/6/10 3:50  | 0.719 | 25.4 | 100.56 | 0.06 |
| 2021/6/10 4:00  | 0.716 | 25.4 | 100.54 | 0.07 |
| 2021/6/10 4:10  | 0.716 | 25.4 | 100.54 | 0.07 |
| 2021/6/10 4:20  | 0.719 | 25.4 | 100.54 | 0.07 |
| 2021/6/10 4:30  | 0.719 | 25.4 | 100.54 | 0.07 |
| 2021/6/10 4:40  | 0.719 | 25.4 | 100.56 | 0.07 |
| 2021/6/10 4:50  | 0.719 | 25.4 | 100.56 | 0.07 |
| 2021/6/10 5:00  | 0.716 | 25.4 | 100.56 | 0.07 |
| 2021/6/10 5:10  | 0.716 | 25.4 | 100.56 | 0.07 |
| 2021/6/10 5:20  | 0.716 | 25.4 | 100.56 | 0.07 |
| 2021/6/10 5:30  | 0.716 | 25.4 | 100.56 | 0.07 |
| 2021/6/10 5:40  | 0.716 | 25.4 | 100.57 | 0.07 |
| 2021/6/10 5:50  | 0.716 | 25.4 | 100.60 | 0.07 |
| 2021/6/10 6:00  | 0.712 | 25.4 | 100.62 | 0.07 |
| 2021/6/10 6:10  | 0.716 | 25.4 | 100.62 | 0.07 |
| 2021/6/10 6:20  | 0.720 | 25.3 | 100.62 | 0.06 |
| 2021/6/10 6:30  | 0.712 | 25.4 | 100.62 | 0.05 |
| 2021/6/10 6:40  | 0.716 | 25.4 | 100.63 | 0.05 |
| 2021/6/10 6:50  | 0.708 | 25.5 | 100.63 | 0.06 |
| 2021/6/10 7:00  | 0.714 | 25.5 | 100.62 | 0.06 |
| 2021/6/10 7:10  | 0.717 | 25.5 | 100.62 | 0.06 |
| 2021/6/10 7:20  | 0.714 | 25.5 | 100.60 | 0.07 |
| 2021/6/10 7:30  | 0.710 | 25.6 | 100.60 | 0.05 |
| 2021/6/10 7:40  | 0.713 | 25.6 | 100.60 | 0.07 |
| 2021/6/10 7:50  | 0.713 | 25.6 | 100.60 | 0.06 |
| 2021/6/10 8:00  | 0.710 | 25.6 | 100.60 | 0.06 |
| 2021/6/10 8:10  | 0.713 | 25.6 | 100.59 | 0.06 |
| 2021/6/10 8:20  | 0.713 | 25.6 | 100.59 | 0.05 |
| 2021/6/10 8:30  | 0.706 | 25.7 | 100.57 | 0.06 |
| 2021/6/10 8:40  | 0.709 | 25.7 | 100.57 | 0.05 |
| 2021/6/10 8:50  | 0.709 | 25.7 | 100.57 | 0.06 |
| 2021/6/10 9:00  | 0.706 | 25.7 | 100.56 | 0.05 |
| 2021/6/10 9:10  | 0.712 | 25.7 | 100.56 | 0.07 |
| 2021/6/10 9:20  | 0.712 | 25.7 | 100.56 | 0.05 |
| 2021/6/10 9:30  | 0.712 | 25.7 | 100.57 | 0.06 |
| 2021/6/10 9:40  | 0.715 | 25.7 | 100.56 | 0.07 |
| 2021/6/10 9:50  | 0.715 | 25.7 | 100.56 | 0.06 |
| 2021/6/10 10:00 | 0.715 | 25.7 | 100.54 | 0.07 |
| 2021/6/10 10:10 | 0.716 | 25.6 | 100.54 | 0.09 |
| 2021/6/10 10:20 | 0.707 | 25.6 | 100.54 | 0.07 |
| 2021/6/10 10:30 | 0.727 | 25.5 | 100.54 | 0.07 |
| 2021/6/10 10:40 | 0.724 | 25.5 | 100.54 | 0.06 |
| 2021/6/10 10:50 | 0.716 | 25.6 | 100.56 | 0.05 |
| 2021/6/10 11:00 | 0.716 | 25.6 | 100.56 | 0.06 |
| 2021/6/10 11:10 | 0.725 | 25.6 | 100.56 | 0.06 |
| 2021/6/10 11:20 | 0.719 | 25.6 | 100.56 | 0.06 |

|                 |       |      |        |      |
|-----------------|-------|------|--------|------|
| 2021/6/10 11:30 | 0.716 | 25.6 | 100.56 | 0.07 |
| 2021/6/10 11:40 | 0.725 | 25.6 | 100.54 | 0.06 |
| 2021/6/10 11:50 | 0.718 | 25.7 | 100.54 | 0.06 |
| 2021/6/10 12:00 | 0.712 | 25.7 | 100.54 | 0.06 |
| 2021/6/10 12:10 | 0.721 | 25.5 | 100.53 | 0.07 |
| 2021/6/10 12:20 | 0.730 | 25.5 | 100.53 | 0.06 |
| 2021/6/10 12:30 | 0.727 | 25.5 | 100.51 | 0.06 |
| 2021/6/10 12:40 | 0.731 | 25.6 | 100.51 | 0.05 |
| 2021/6/10 12:50 | 0.725 | 25.6 | 100.51 | 0.06 |
| 2021/6/10 13:00 | 0.728 | 25.6 | 100.50 | 0.06 |
| 2021/6/10 13:10 | 0.721 | 25.7 | 100.50 | 0.06 |
| 2021/6/10 13:20 | 0.724 | 25.7 | 100.50 | 0.06 |
| 2021/6/10 13:30 | 0.730 | 25.7 | 100.51 | 0.06 |
| 2021/6/10 13:40 | 0.724 | 25.7 | 100.50 | 0.06 |
| 2021/6/10 13:50 | 0.730 | 25.7 | 100.49 | 0.06 |
| 2021/6/10 14:00 | 0.727 | 25.7 | 100.49 | 0.07 |
| 2021/6/10 14:10 | 0.730 | 25.7 | 100.49 | 0.05 |
| 2021/6/10 14:20 | 0.721 | 25.7 | 100.47 | 0.07 |
| 2021/6/10 14:30 | 0.731 | 25.6 | 100.47 | 0.06 |
| 2021/6/10 14:40 | 0.735 | 25.6 | 100.46 | 0.06 |
| 2021/6/10 14:50 | 0.731 | 25.6 | 100.49 | 0.06 |
| 2021/6/10 15:00 | 0.730 | 25.7 | 100.47 | 0.06 |
| 2021/6/10 15:10 | 0.727 | 25.7 | 100.47 | 0.06 |
| 2021/6/10 15:20 | 0.730 | 25.7 | 100.46 | 0.05 |
| 2021/6/10 15:30 | 0.721 | 25.7 | 100.44 | 0.06 |
| 2021/6/10 15:40 | 0.727 | 25.7 | 100.43 | 0.06 |
| 2021/6/10 15:50 | 0.718 | 25.7 | 100.44 | 0.07 |
| 2021/6/10 16:00 | 0.727 | 25.7 | 100.44 | 0.05 |
| 2021/6/10 16:10 | 0.727 | 25.7 | 100.44 | 0.06 |
| 2021/6/10 16:20 | 0.727 | 25.7 | 100.44 | 0.06 |
| 2021/6/10 16:30 | 0.727 | 25.7 | 100.43 | 0.05 |
| 2021/6/10 16:40 | 0.718 | 25.7 | 100.41 | 0.07 |
| 2021/6/10 16:50 | 0.731 | 25.6 | 100.41 | 0.06 |
| 2021/6/10 17:00 | 0.725 | 25.6 | 100.40 | 0.05 |
| 2021/6/10 17:10 | 0.722 | 25.6 | 100.40 | 0.06 |
| 2021/6/10 17:20 | 0.724 | 25.7 | 100.38 | 0.06 |
| 2021/6/10 17:30 | 0.735 | 25.6 | 100.38 | 0.06 |
| 2021/6/10 17:40 | 0.728 | 25.6 | 100.38 | 0.06 |
| 2021/6/10 17:50 | 0.725 | 25.6 | 100.40 | 0.06 |
| 2021/6/10 18:00 | 0.731 | 25.6 | 100.40 | 0.06 |
| 2021/6/10 18:10 | 0.728 | 25.6 | 100.40 | 0.06 |
| 2021/6/10 18:20 | 0.727 | 25.7 | 100.38 | 0.06 |
| 2021/6/10 18:30 | 0.730 | 25.7 | 100.38 | 0.06 |
| 2021/6/10 18:40 | 0.733 | 25.7 | 100.40 | 0.06 |
| 2021/6/10 18:50 | 0.730 | 25.7 | 100.41 | 0.08 |
| 2021/6/10 19:00 | 0.735 | 25.6 | 100.43 | 0.07 |
| 2021/6/10 19:10 | 0.735 | 25.6 | 100.44 | 0.07 |
| 2021/6/10 19:20 | 0.731 | 25.6 | 100.44 | 0.06 |
| 2021/6/10 19:30 | 0.735 | 25.6 | 100.46 | 0.06 |
| 2021/6/10 19:40 | 0.739 | 25.5 | 100.47 | 0.07 |
| 2021/6/10 19:50 | 0.733 | 25.5 | 100.49 | 0.05 |
| 2021/6/10 20:00 | 0.739 | 25.5 | 100.50 | 0.06 |
| 2021/6/10 20:10 | 0.739 | 25.5 | 100.51 | 0.07 |
| 2021/6/10 20:20 | 0.739 | 25.5 | 100.51 | 0.07 |
| 2021/6/10 20:30 | 0.739 | 25.5 | 100.51 | 0.07 |
| 2021/6/10 20:40 | 0.742 | 25.5 | 100.51 | 0.06 |

|                 |       |      |        |      |
|-----------------|-------|------|--------|------|
| 2021/6/10 20:50 | 0.742 | 25.5 | 100.51 | 0.07 |
| 2021/6/10 21:00 | 0.742 | 25.5 | 100.53 | 0.06 |
| 2021/6/10 21:10 | 0.742 | 25.5 | 100.53 | 0.07 |
| 2021/6/10 21:20 | 0.742 | 25.5 | 100.53 | 0.07 |
| 2021/6/10 21:30 | 0.739 | 25.5 | 100.54 | 0.05 |
| 2021/6/10 21:40 | 0.745 | 25.5 | 100.54 | 0.07 |
| 2021/6/10 21:50 | 0.745 | 25.5 | 100.54 | 0.07 |
| 2021/6/10 22:00 | 0.745 | 25.5 | 100.56 | 0.07 |
| 2021/6/10 22:10 | 0.745 | 25.5 | 100.57 | 0.07 |
| 2021/6/10 22:20 | 0.745 | 25.5 | 100.59 | 0.07 |
| 2021/6/10 22:30 | 0.745 | 25.5 | 100.57 | 0.07 |
| 2021/6/10 22:40 | 0.745 | 25.5 | 100.56 | 0.06 |
| 2021/6/10 22:50 | 0.748 | 25.5 | 100.54 | 0.07 |
| 2021/6/10 23:00 | 0.745 | 25.5 | 100.53 | 0.07 |
| 2021/6/10 23:10 | 0.745 | 25.5 | 100.53 | 0.07 |
| 2021/6/10 23:20 | 0.745 | 25.5 | 100.54 | 0.08 |
| 2021/6/10 23:30 | 0.745 | 25.5 | 100.53 | 0.06 |
| 2021/6/10 23:40 | 0.742 | 25.5 | 100.53 | 0.07 |
| 2021/6/10 23:50 | 0.742 | 25.3 | 100.51 | 0.07 |
| 2021/6/11 0:00  | 0.752 | 25.2 | 100.50 | 0.08 |
| 2021/6/11 0:10  | 0.751 | 25.3 | 100.49 | 0.07 |
| 2021/6/11 0:20  | 0.754 | 25.3 | 100.49 | 0.07 |
| 2021/6/11 0:30  | 0.754 | 25.3 | 100.49 | 0.08 |
| 2021/6/11 0:40  | 0.749 | 25.4 | 100.47 | 0.07 |
| 2021/6/11 0:50  | 0.753 | 25.4 | 100.47 | 0.07 |
| 2021/6/11 1:00  | 0.753 | 25.4 | 100.47 | 0.07 |
| 2021/6/11 1:10  | 0.749 | 25.4 | 100.47 | 0.07 |
| 2021/6/11 1:20  | 0.753 | 25.4 | 100.47 | 0.06 |
| 2021/6/11 1:30  | 0.748 | 25.5 | 100.46 | 0.07 |
| 2021/6/11 1:40  | 0.748 | 25.5 | 100.47 | 0.07 |
| 2021/6/11 1:50  | 0.748 | 25.5 | 100.46 | 0.07 |
| 2021/6/11 2:00  | 0.751 | 25.5 | 100.46 | 0.07 |
| 2021/6/11 2:10  | 0.748 | 25.5 | 100.46 | 0.07 |
| 2021/6/11 2:20  | 0.751 | 25.5 | 100.46 | 0.07 |
| 2021/6/11 2:30  | 0.751 | 25.5 | 100.44 | 0.07 |
| 2021/6/11 2:40  | 0.748 | 25.5 | 100.43 | 0.07 |
| 2021/6/11 2:50  | 0.748 | 25.5 | 100.43 | 0.07 |
| 2021/6/11 3:00  | 0.751 | 25.5 | 100.43 | 0.07 |
| 2021/6/11 3:10  | 0.748 | 25.5 | 100.43 | 0.07 |
| 2021/6/11 3:20  | 0.748 | 25.5 | 100.43 | 0.07 |
| 2021/6/11 3:30  | 0.751 | 25.5 | 100.43 | 0.07 |
| 2021/6/11 3:40  | 0.748 | 25.5 | 100.41 | 0.08 |
| 2021/6/11 3:50  | 0.748 | 25.5 | 100.41 | 0.07 |
| 2021/6/11 4:00  | 0.748 | 25.5 | 100.41 | 0.07 |
| 2021/6/11 4:10  | 0.751 | 25.5 | 100.41 | 0.07 |
| 2021/6/11 4:20  | 0.748 | 25.5 | 100.41 | 0.07 |
| 2021/6/11 4:30  | 0.748 | 25.5 | 100.40 | 0.07 |
| 2021/6/11 4:40  | 0.751 | 25.5 | 100.37 | 0.07 |
| 2021/6/11 4:50  | 0.748 | 25.5 | 100.38 | 0.08 |
| 2021/6/11 5:00  | 0.748 | 25.5 | 100.40 | 0.07 |
| 2021/6/11 5:10  | 0.751 | 25.5 | 100.40 | 0.07 |
| 2021/6/11 5:20  | 0.748 | 25.5 | 100.41 | 0.08 |
| 2021/6/11 5:30  | 0.748 | 25.5 | 100.43 | 0.07 |
| 2021/6/11 5:40  | 0.751 | 25.5 | 100.44 | 0.07 |
| 2021/6/11 5:50  | 0.751 | 25.5 | 100.44 | 0.07 |
| 2021/6/11 6:00  | 0.751 | 25.5 | 100.46 | 0.08 |

|                 |       |      |        |      |
|-----------------|-------|------|--------|------|
| 2021/6/11 6:10  | 0.753 | 25.4 | 100.44 | 0.07 |
| 2021/6/11 6:20  | 0.756 | 25.4 | 100.44 | 0.07 |
| 2021/6/11 6:30  | 0.749 | 25.4 | 100.44 | 0.05 |
| 2021/6/11 6:40  | 0.745 | 25.5 | 100.44 | 0.07 |
| 2021/6/11 6:50  | 0.751 | 25.5 | 100.44 | 0.06 |
| 2021/6/11 7:00  | 0.751 | 25.5 | 100.44 | 0.07 |
| 2021/6/11 7:10  | 0.747 | 25.6 | 100.44 | 0.06 |
| 2021/6/11 7:20  | 0.750 | 25.6 | 100.46 | 0.06 |
| 2021/6/11 7:30  | 0.744 | 25.6 | 100.46 | 0.07 |
| 2021/6/11 7:40  | 0.747 | 25.6 | 100.46 | 0.06 |
| 2021/6/11 7:50  | 0.744 | 25.6 | 100.46 | 0.07 |
| 2021/6/11 8:00  | 0.744 | 25.6 | 100.46 | 0.06 |
| 2021/6/11 8:10  | 0.747 | 25.6 | 100.44 | 0.06 |
| 2021/6/11 8:20  | 0.744 | 25.6 | 100.43 | 0.06 |
| 2021/6/11 8:30  | 0.744 | 25.6 | 100.43 | 0.06 |
| 2021/6/11 8:40  | 0.747 | 25.6 | 100.43 | 0.06 |
| 2021/6/11 8:50  | 0.747 | 25.6 | 100.43 | 0.07 |
| 2021/6/11 9:00  | 0.747 | 25.6 | 100.43 | 0.05 |
| 2021/6/11 9:10  | 0.735 | 25.6 | 100.44 | 0.08 |
| 2021/6/11 9:20  | 0.744 | 25.6 | 100.43 | 0.05 |
| 2021/6/11 9:30  | 0.747 | 25.6 | 100.41 | 0.06 |
| 2021/6/11 9:40  | 0.735 | 25.6 | 100.41 | 0.07 |
| 2021/6/11 9:50  | 0.744 | 25.6 | 100.41 | 0.06 |
| 2021/6/11 10:00 | 0.747 | 25.6 | 100.41 | 0.06 |
| 2021/6/11 10:10 | 0.742 | 25.7 | 100.43 | 0.05 |
| 2021/6/11 10:20 | 0.742 | 25.7 | 100.43 | 0.06 |
| 2021/6/11 10:30 | 0.739 | 25.7 | 100.43 | 0.06 |
| 2021/6/11 10:40 | 0.739 | 25.7 | 100.41 | 0.06 |
| 2021/6/11 10:50 | 0.727 | 25.7 | 100.40 | 0.07 |
| 2021/6/11 11:00 | 0.739 | 25.7 | 100.41 | 0.06 |
| 2021/6/11 11:10 | 0.736 | 25.7 | 100.40 | 0.07 |
| 2021/6/11 11:20 | 0.742 | 25.7 | 100.40 | 0.06 |
| 2021/6/11 11:30 | 0.739 | 25.7 | 100.38 | 0.06 |
| 2021/6/11 11:40 | 0.739 | 25.7 | 100.38 | 0.06 |
| 2021/6/11 11:50 | 0.736 | 25.7 | 100.38 | 0.06 |
| 2021/6/11 12:00 | 0.733 | 25.7 | 100.37 | 0.06 |
| 2021/6/11 12:10 | 0.733 | 25.7 | 100.35 | 0.06 |
| 2021/6/11 12:20 | 0.739 | 25.7 | 100.35 | 0.05 |
| 2021/6/11 12:30 | 0.733 | 25.7 | 100.35 | 0.07 |
| 2021/6/11 12:40 | 0.742 | 25.7 | 100.35 | 0.05 |
| 2021/6/11 12:50 | 0.736 | 25.7 | 100.35 | 0.06 |
| 2021/6/11 13:00 | 0.733 | 25.7 | 100.35 | 0.06 |
| 2021/6/11 13:10 | 0.735 | 25.6 | 100.35 | 0.07 |
| 2021/6/11 13:20 | 0.744 | 25.6 | 100.35 | 0.05 |
| 2021/6/11 13:30 | 0.738 | 25.6 | 100.37 | 0.06 |
| 2021/6/11 13:40 | 0.747 | 25.6 | 100.37 | 0.06 |
| 2021/6/11 13:50 | 0.744 | 25.6 | 100.35 | 0.06 |
| 2021/6/11 14:00 | 0.741 | 25.6 | 100.34 | 0.06 |
| 2021/6/11 14:10 | 0.744 | 25.6 | 100.35 | 0.05 |
| 2021/6/11 14:20 | 0.733 | 25.7 | 100.35 | 0.06 |
| 2021/6/11 14:30 | 0.736 | 25.7 | 100.35 | 0.06 |
| 2021/6/11 14:40 | 0.730 | 25.7 | 100.37 | 0.06 |
| 2021/6/11 14:50 | 0.733 | 25.7 | 100.37 | 0.05 |
| 2021/6/11 15:00 | 0.739 | 25.7 | 100.35 | 0.05 |
| 2021/6/11 15:10 | 0.730 | 25.7 | 100.37 | 0.06 |
| 2021/6/11 15:20 | 0.739 | 25.7 | 100.38 | 0.05 |

|                 |       |      |        |      |
|-----------------|-------|------|--------|------|
| 2021/6/11 15:30 | 0.739 | 25.7 | 100.37 | 0.06 |
| 2021/6/11 15:40 | 0.745 | 25.7 | 100.35 | 0.06 |
| 2021/6/11 15:50 | 0.742 | 25.7 | 100.35 | 0.07 |
| 2021/6/11 16:00 | 0.742 | 25.7 | 100.35 | 0.06 |
| 2021/6/11 16:10 | 0.745 | 25.7 | 100.35 | 0.07 |
| 2021/6/11 16:20 | 0.739 | 25.7 | 100.35 | 0.07 |
| 2021/6/11 16:30 | 0.745 | 25.7 | 100.34 | 0.05 |
| 2021/6/11 16:40 | 0.736 | 25.7 | 100.34 | 0.06 |
| 2021/6/11 16:50 | 0.741 | 25.6 | 100.34 | 0.06 |
| 2021/6/11 17:00 | 0.747 | 25.6 | 100.35 | 0.05 |
| 2021/6/11 17:10 | 0.741 | 25.6 | 100.34 | 0.08 |
| 2021/6/11 17:20 | 0.747 | 25.6 | 100.35 | 0.05 |
| 2021/6/11 17:30 | 0.733 | 25.7 | 100.35 | 0.07 |
| 2021/6/11 17:40 | 0.747 | 25.6 | 100.35 | 0.06 |
| 2021/6/11 17:50 | 0.745 | 25.7 | 100.37 | 0.06 |
| 2021/6/11 18:00 | 0.741 | 25.6 | 100.38 | 0.07 |
| 2021/6/11 18:10 | 0.747 | 25.6 | 100.38 | 0.05 |
| 2021/6/11 18:20 | 0.739 | 25.7 | 100.40 | 0.07 |
| 2021/6/11 18:30 | 0.750 | 25.6 | 100.40 | 0.06 |
| 2021/6/11 18:40 | 0.753 | 25.6 | 100.38 | 0.07 |
| 2021/6/11 18:50 | 0.753 | 25.6 | 100.38 | 0.07 |
| 2021/6/11 19:00 | 0.753 | 25.6 | 100.40 | 0.07 |
| 2021/6/11 19:10 | 0.753 | 25.6 | 100.40 | 0.07 |
| 2021/6/11 19:20 | 0.750 | 25.6 | 100.40 | 0.07 |
| 2021/6/11 19:30 | 0.741 | 25.6 | 100.40 | 0.06 |
| 2021/6/11 19:40 | 0.747 | 25.6 | 100.40 | 0.08 |
| 2021/6/11 19:50 | 0.751 | 25.5 | 100.38 | 0.07 |
| 2021/6/11 20:00 | 0.754 | 25.5 | 100.38 | 0.07 |
| 2021/6/11 20:10 | 0.751 | 25.5 | 100.38 | 0.08 |
| 2021/6/11 20:20 | 0.751 | 25.5 | 100.38 | 0.06 |
| 2021/6/11 20:30 | 0.751 | 25.5 | 100.38 | 0.07 |
| 2021/6/11 20:40 | 0.751 | 25.5 | 100.38 | 0.06 |
| 2021/6/11 20:50 | 0.744 | 25.6 | 100.38 | 0.06 |
| 2021/6/11 21:00 | 0.748 | 25.5 | 100.40 | 0.07 |
| 2021/6/11 21:10 | 0.751 | 25.5 | 100.40 | 0.07 |
| 2021/6/11 21:20 | 0.748 | 25.5 | 100.43 | 0.08 |
| 2021/6/11 21:30 | 0.748 | 25.5 | 100.46 | 0.06 |
| 2021/6/11 21:40 | 0.751 | 25.5 | 100.46 | 0.07 |
| 2021/6/11 21:50 | 0.748 | 25.5 | 100.46 | 0.07 |
| 2021/6/11 22:00 | 0.748 | 25.5 | 100.44 | 0.06 |
| 2021/6/11 22:10 | 0.751 | 25.5 | 100.46 | 0.07 |
| 2021/6/11 22:20 | 0.748 | 25.5 | 100.46 | 0.08 |
| 2021/6/11 22:30 | 0.748 | 25.5 | 100.46 | 0.06 |
| 2021/6/11 22:40 | 0.751 | 25.5 | 100.44 | 0.08 |
| 2021/6/11 22:50 | 0.748 | 25.5 | 100.44 | 0.07 |
| 2021/6/11 23:00 | 0.751 | 25.5 | 100.43 | 0.07 |
| 2021/6/11 23:10 | 0.748 | 25.5 | 100.43 | 0.08 |
| 2021/6/11 23:20 | 0.748 | 25.5 | 100.44 | 0.07 |
| 2021/6/11 23:30 | 0.751 | 25.5 | 100.40 | 0.06 |
| 2021/6/11 23:40 | 0.748 | 25.5 | 100.38 | 0.08 |
| 2021/6/11 23:50 | 0.748 | 25.5 | 100.37 | 0.06 |
| 2021/6/12 0:00  | 0.748 | 25.5 | 100.37 | 0.08 |
| 2021/6/12 0:10  | 0.748 | 25.5 | 100.37 | 0.07 |
| 2021/6/12 0:20  | 0.751 | 25.5 | 100.35 | 0.06 |
| 2021/6/12 0:30  | 0.748 | 25.5 | 100.34 | 0.08 |
| 2021/6/12 0:40  | 0.748 | 25.5 | 100.34 | 0.07 |

|                 |       |      |        |      |
|-----------------|-------|------|--------|------|
| 2021/6/12 0:50  | 0.751 | 25.5 | 100.34 | 0.07 |
| 2021/6/12 1:00  | 0.748 | 25.5 | 100.34 | 0.08 |
| 2021/6/12 1:10  | 0.748 | 25.5 | 100.34 | 0.08 |
| 2021/6/12 1:20  | 0.748 | 25.5 | 100.34 | 0.07 |
| 2021/6/12 1:30  | 0.748 | 25.5 | 100.34 | 0.07 |
| 2021/6/12 1:40  | 0.745 | 25.5 | 100.32 | 0.08 |
| 2021/6/12 1:50  | 0.745 | 25.5 | 100.32 | 0.07 |
| 2021/6/12 2:00  | 0.748 | 25.5 | 100.32 | 0.07 |
| 2021/6/12 2:10  | 0.748 | 25.5 | 100.32 | 0.07 |
| 2021/6/12 2:20  | 0.745 | 25.5 | 100.32 | 0.08 |
| 2021/6/12 2:30  | 0.745 | 25.5 | 100.32 | 0.07 |
| 2021/6/12 2:40  | 0.745 | 25.5 | 100.31 | 0.07 |
| 2021/6/12 2:50  | 0.748 | 25.5 | 100.29 | 0.07 |
| 2021/6/12 3:00  | 0.745 | 25.5 | 100.31 | 0.07 |
| 2021/6/12 3:10  | 0.745 | 25.5 | 100.29 | 0.07 |
| 2021/6/12 3:20  | 0.745 | 25.5 | 100.29 | 0.07 |
| 2021/6/12 3:30  | 0.745 | 25.5 | 100.29 | 0.07 |
| 2021/6/12 3:40  | 0.742 | 25.5 | 100.29 | 0.07 |
| 2021/6/12 3:50  | 0.746 | 25.4 | 100.29 | 0.08 |
| 2021/6/12 4:00  | 0.746 | 25.4 | 100.29 | 0.08 |
| 2021/6/12 4:10  | 0.746 | 25.4 | 100.29 | 0.07 |
| 2021/6/12 4:20  | 0.746 | 25.4 | 100.29 | 0.07 |
| 2021/6/12 4:30  | 0.746 | 25.4 | 100.28 | 0.08 |
| 2021/6/12 4:40  | 0.743 | 25.4 | 100.28 | 0.07 |
| 2021/6/12 4:50  | 0.743 | 25.4 | 100.28 | 0.07 |
| 2021/6/12 5:00  | 0.746 | 25.4 | 100.28 | 0.07 |
| 2021/6/12 5:10  | 0.746 | 25.4 | 100.28 | 0.07 |
| 2021/6/12 5:20  | 0.737 | 25.4 | 100.29 | 0.07 |
| 2021/6/12 5:30  | 0.743 | 25.2 | 100.29 | 0.07 |
| 2021/6/12 5:40  | 0.750 | 25.1 | 100.32 | 0.08 |
| 2021/6/12 5:50  | 0.750 | 25.1 | 100.32 | 0.08 |
| 2021/6/12 6:00  | 0.749 | 25.2 | 100.32 | 0.07 |
| 2021/6/12 6:10  | 0.749 | 25.2 | 100.32 | 0.08 |
| 2021/6/12 6:20  | 0.749 | 25.2 | 100.31 | 0.07 |
| 2021/6/12 6:30  | 0.746 | 25.2 | 100.28 | 0.05 |
| 2021/6/12 6:40  | 0.745 | 25.3 | 100.29 | 0.06 |
| 2021/6/12 6:50  | 0.740 | 25.4 | 100.31 | 0.06 |
| 2021/6/12 7:00  | 0.739 | 25.5 | 100.31 | 0.05 |
| 2021/6/12 7:10  | 0.742 | 25.5 | 100.31 | 0.06 |
| 2021/6/12 7:20  | 0.745 | 25.5 | 100.32 | 0.06 |
| 2021/6/12 7:30  | 0.738 | 25.6 | 100.32 | 0.06 |
| 2021/6/12 7:40  | 0.738 | 25.6 | 100.32 | 0.06 |
| 2021/6/12 7:50  | 0.735 | 25.6 | 100.34 | 0.08 |
| 2021/6/12 8:00  | 0.741 | 25.6 | 100.35 | 0.05 |
| 2021/6/12 8:10  | 0.744 | 25.6 | 100.35 | 0.05 |
| 2021/6/12 8:20  | 0.741 | 25.6 | 100.37 | 0.06 |
| 2021/6/12 8:30  | 0.741 | 25.6 | 100.37 | 0.08 |
| 2021/6/12 8:40  | 0.744 | 25.6 | 100.37 | 0.05 |
| 2021/6/12 8:50  | 0.741 | 25.6 | 100.38 | 0.07 |
| 2021/6/12 9:00  | 0.747 | 25.6 | 100.37 | 0.06 |
| 2021/6/12 9:10  | 0.742 | 25.7 | 100.37 | 0.06 |
| 2021/6/12 9:20  | 0.742 | 25.7 | 100.37 | 0.05 |
| 2021/6/12 9:30  | 0.742 | 25.7 | 100.37 | 0.06 |
| 2021/6/12 9:40  | 0.745 | 25.7 | 100.37 | 0.06 |
| 2021/6/12 9:50  | 0.745 | 25.7 | 100.37 | 0.05 |
| 2021/6/12 10:00 | 0.742 | 25.7 | 100.37 | 0.06 |

|                 |       |      |        |      |
|-----------------|-------|------|--------|------|
| 2021/6/12 10:10 | 0.741 | 25.6 | 100.37 | 0.07 |
| 2021/6/12 10:20 | 0.747 | 25.6 | 100.38 | 0.05 |
| 2021/6/12 10:30 | 0.747 | 25.6 | 100.37 | 0.07 |
| 2021/6/12 10:40 | 0.750 | 25.6 | 100.37 | 0.07 |
| 2021/6/12 10:50 | 0.753 | 25.6 | 100.37 | 0.05 |
| 2021/6/12 11:00 | 0.741 | 25.6 | 100.35 | 0.07 |
| 2021/6/12 11:10 | 0.750 | 25.6 | 100.35 | 0.05 |
| 2021/6/12 11:20 | 0.742 | 25.7 | 100.35 | 0.06 |
| 2021/6/12 11:30 | 0.747 | 25.6 | 100.32 | 0.07 |
| 2021/6/12 11:40 | 0.750 | 25.6 | 100.31 | 0.05 |
| 2021/6/12 11:50 | 0.750 | 25.6 | 100.31 | 0.06 |
| 2021/6/12 12:00 | 0.742 | 25.7 | 100.31 | 0.06 |
| 2021/6/12 12:10 | 0.745 | 25.7 | 100.31 | 0.05 |
| 2021/6/12 12:20 | 0.748 | 25.7 | 100.31 | 0.06 |
| 2021/6/12 12:30 | 0.739 | 25.7 | 100.32 | 0.07 |
| 2021/6/12 12:40 | 0.748 | 25.7 | 100.32 | 0.05 |
| 2021/6/12 12:50 | 0.742 | 25.7 | 100.32 | 0.07 |
| 2021/6/12 13:00 | 0.750 | 25.6 | 100.32 | 0.05 |
| 2021/6/12 13:10 | 0.745 | 25.7 | 100.32 | 0.05 |
| 2021/6/12 13:20 | 0.744 | 25.6 | 100.31 | 0.07 |
| 2021/6/12 13:30 | 0.747 | 25.6 | 100.31 | 0.05 |
| 2021/6/12 13:40 | 0.742 | 25.7 | 100.29 | 0.07 |
| 2021/6/12 13:50 | 0.742 | 25.7 | 100.29 | 0.05 |
| 2021/6/12 14:00 | 0.742 | 25.7 | 100.28 | 0.05 |
| 2021/6/12 14:10 | 0.747 | 25.6 | 100.28 | 0.07 |
| 2021/6/12 14:20 | 0.750 | 25.6 | 100.28 | 0.05 |
| 2021/6/12 14:30 | 0.738 | 25.6 | 100.27 | 0.07 |
| 2021/6/12 14:40 | 0.747 | 25.6 | 100.25 | 0.06 |
| 2021/6/12 14:50 | 0.750 | 25.6 | 100.25 | 0.05 |
| 2021/6/12 15:00 | 0.741 | 25.6 | 100.25 | 0.07 |
| 2021/6/12 15:10 | 0.750 | 25.6 | 100.27 | 0.05 |
| 2021/6/12 15:20 | 0.745 | 25.7 | 100.27 | 0.06 |
| 2021/6/12 15:30 | 0.742 | 25.7 | 100.27 | 0.06 |
| 2021/6/12 15:40 | 0.742 | 25.7 | 100.28 | 0.06 |
| 2021/6/12 15:50 | 0.739 | 25.7 | 100.28 | 0.06 |
| 2021/6/12 16:00 | 0.736 | 25.7 | 100.27 | 0.06 |
| 2021/6/12 16:10 | 0.739 | 25.5 | 100.27 | 0.07 |
| 2021/6/12 16:20 | 0.754 | 25.5 | 100.27 | 0.05 |
| 2021/6/12 16:30 | 0.747 | 25.6 | 100.28 | 0.06 |
| 2021/6/12 16:40 | 0.747 | 25.6 | 100.28 | 0.07 |
| 2021/6/12 16:50 | 0.747 | 25.6 | 100.28 | 0.05 |
| 2021/6/12 17:00 | 0.747 | 25.6 | 100.28 | 0.07 |
| 2021/6/12 17:10 | 0.750 | 25.6 | 100.28 | 0.05 |
| 2021/6/12 17:20 | 0.747 | 25.6 | 100.29 | 0.06 |
| 2021/6/12 17:30 | 0.747 | 25.6 | 100.29 | 0.07 |
| 2021/6/12 17:40 | 0.750 | 25.6 | 100.29 | 0.05 |
| 2021/6/12 17:50 | 0.744 | 25.6 | 100.29 | 0.07 |
| 2021/6/12 18:00 | 0.747 | 25.6 | 100.31 | 0.06 |
| 2021/6/12 18:10 | 0.742 | 25.7 | 100.31 | 0.07 |
| 2021/6/12 18:20 | 0.750 | 25.6 | 100.29 | 0.07 |
| 2021/6/12 18:30 | 0.747 | 25.6 | 100.29 | 0.05 |
| 2021/6/12 18:40 | 0.753 | 25.6 | 100.29 | 0.06 |
| 2021/6/12 18:50 | 0.753 | 25.6 | 100.31 | 0.07 |
| 2021/6/12 19:00 | 0.750 | 25.6 | 100.31 | 0.07 |
| 2021/6/12 19:10 | 0.757 | 25.5 | 100.31 | 0.06 |
| 2021/6/12 19:20 | 0.757 | 25.5 | 100.31 | 0.07 |

|                 |       |      |        |      |
|-----------------|-------|------|--------|------|
| 2021/6/12 19:30 | 0.754 | 25.5 | 100.31 | 0.07 |
| 2021/6/12 19:40 | 0.754 | 25.5 | 100.28 | 0.07 |
| 2021/6/12 19:50 | 0.754 | 25.5 | 100.31 | 0.06 |
| 2021/6/12 20:00 | 0.754 | 25.5 | 100.31 | 0.07 |
| 2021/6/12 20:10 | 0.751 | 25.5 | 100.32 | 0.07 |
| 2021/6/12 20:20 | 0.754 | 25.5 | 100.34 | 0.06 |
| 2021/6/12 20:30 | 0.754 | 25.5 | 100.35 | 0.07 |
| 2021/6/12 20:40 | 0.754 | 25.5 | 100.37 | 0.06 |
| 2021/6/12 20:50 | 0.751 | 25.5 | 100.38 | 0.07 |
| 2021/6/12 21:00 | 0.748 | 25.5 | 100.41 | 0.07 |
| 2021/6/12 21:10 | 0.751 | 25.5 | 100.43 | 0.07 |
| 2021/6/12 21:20 | 0.751 | 25.5 | 100.43 | 0.07 |
| 2021/6/12 21:30 | 0.751 | 25.5 | 100.41 | 0.07 |
| 2021/6/12 21:40 | 0.748 | 25.5 | 100.41 | 0.07 |
| 2021/6/12 21:50 | 0.753 | 25.4 | 100.43 | 0.07 |
| 2021/6/12 22:00 | 0.753 | 25.4 | 100.44 | 0.07 |
| 2021/6/12 22:10 | 0.753 | 25.4 | 100.44 | 0.07 |
| 2021/6/12 22:20 | 0.749 | 25.4 | 100.46 | 0.07 |
| 2021/6/12 22:30 | 0.749 | 25.4 | 100.46 | 0.07 |
| 2021/6/12 22:40 | 0.749 | 25.4 | 100.44 | 0.07 |
| 2021/6/12 22:50 | 0.749 | 25.4 | 100.46 | 0.07 |
| 2021/6/12 23:00 | 0.749 | 25.4 | 100.47 | 0.07 |
| 2021/6/12 23:10 | 0.749 | 25.4 | 100.46 | 0.08 |
| 2021/6/12 23:20 | 0.746 | 25.4 | 100.46 | 0.07 |
| 2021/6/12 23:30 | 0.746 | 25.4 | 100.44 | 0.08 |
| 2021/6/12 23:40 | 0.749 | 25.4 | 100.43 | 0.07 |
| 2021/6/12 23:50 | 0.749 | 25.4 | 100.43 | 0.07 |
| 2021/6/13 0:00  | 0.749 | 25.4 | 100.41 | 0.07 |
| 2021/6/13 0:10  | 0.749 | 25.4 | 100.40 | 0.07 |
| 2021/6/13 0:20  | 0.749 | 25.4 | 100.38 | 0.07 |
| 2021/6/13 0:30  | 0.743 | 25.4 | 100.38 | 0.08 |
| 2021/6/13 0:40  | 0.743 | 25.4 | 100.35 | 0.07 |
| 2021/6/13 0:50  | 0.746 | 25.4 | 100.37 | 0.08 |
| 2021/6/13 1:00  | 0.746 | 25.4 | 100.35 | 0.08 |
| 2021/6/13 1:10  | 0.746 | 25.4 | 100.35 | 0.07 |
| 2021/6/13 1:20  | 0.746 | 25.4 | 100.34 | 0.07 |
| 2021/6/13 1:30  | 0.743 | 25.4 | 100.34 | 0.07 |
| 2021/6/13 1:40  | 0.743 | 25.4 | 100.32 | 0.07 |
| 2021/6/13 1:50  | 0.743 | 25.4 | 100.34 | 0.07 |
| 2021/6/13 2:00  | 0.743 | 25.4 | 100.35 | 0.07 |
| 2021/6/13 2:10  | 0.743 | 25.4 | 100.37 | 0.07 |
| 2021/6/13 2:20  | 0.743 | 25.4 | 100.37 | 0.07 |
| 2021/6/13 2:30  | 0.743 | 25.4 | 100.37 | 0.07 |
| 2021/6/13 2:40  | 0.745 | 25.3 | 100.38 | 0.07 |
| 2021/6/13 2:50  | 0.745 | 25.3 | 100.38 | 0.08 |
| 2021/6/13 3:00  | 0.745 | 25.3 | 100.40 | 0.07 |
| 2021/6/13 3:10  | 0.745 | 25.3 | 100.37 | 0.08 |
| 2021/6/13 3:20  | 0.745 | 25.3 | 100.37 | 0.07 |
| 2021/6/13 3:30  | 0.745 | 25.3 | 100.38 | 0.07 |
| 2021/6/13 3:40  | 0.745 | 25.3 | 100.38 | 0.07 |
| 2021/6/13 3:50  | 0.745 | 25.3 | 100.40 | 0.07 |
| 2021/6/13 4:00  | 0.745 | 25.3 | 100.40 | 0.07 |
| 2021/6/13 4:10  | 0.745 | 25.3 | 100.40 | 0.07 |
| 2021/6/13 4:20  | 0.745 | 25.3 | 100.40 | 0.07 |
| 2021/6/13 4:30  | 0.745 | 25.3 | 100.40 | 0.07 |
| 2021/6/13 4:40  | 0.742 | 25.3 | 100.40 | 0.07 |

|                 |       |      |        |      |
|-----------------|-------|------|--------|------|
| 2021/6/13 4:50  | 0.742 | 25.3 | 100.41 | 0.08 |
| 2021/6/13 5:00  | 0.742 | 25.3 | 100.41 | 0.07 |
| 2021/6/13 5:10  | 0.742 | 25.3 | 100.41 | 0.07 |
| 2021/6/13 5:20  | 0.742 | 25.3 | 100.41 | 0.07 |
| 2021/6/13 5:30  | 0.742 | 25.3 | 100.43 | 0.07 |
| 2021/6/13 5:40  | 0.742 | 25.3 | 100.44 | 0.07 |
| 2021/6/13 5:50  | 0.742 | 25.3 | 100.46 | 0.07 |
| 2021/6/13 6:00  | 0.742 | 25.3 | 100.46 | 0.07 |
| 2021/6/13 6:10  | 0.742 | 25.3 | 100.47 | 0.07 |
| 2021/6/13 6:20  | 0.742 | 25.3 | 100.46 | 0.07 |
| 2021/6/13 6:30  | 0.738 | 25.3 | 100.47 | 0.06 |
| 2021/6/13 6:40  | 0.742 | 25.3 | 100.47 | 0.05 |
| 2021/6/13 6:50  | 0.737 | 25.4 | 100.47 | 0.06 |
| 2021/6/13 7:00  | 0.737 | 25.4 | 100.50 | 0.06 |
| 2021/6/13 7:10  | 0.736 | 25.5 | 100.50 | 0.05 |
| 2021/6/13 7:20  | 0.739 | 25.5 | 100.51 | 0.07 |
| 2021/6/13 7:30  | 0.735 | 25.6 | 100.53 | 0.05 |
| 2021/6/13 7:40  | 0.731 | 25.6 | 100.54 | 0.07 |
| 2021/6/13 7:50  | 0.731 | 25.6 | 100.54 | 0.05 |
| 2021/6/13 8:00  | 0.731 | 25.6 | 100.54 | 0.07 |
| 2021/6/13 8:10  | 0.735 | 25.6 | 100.53 | 0.06 |
| 2021/6/13 8:20  | 0.735 | 25.6 | 100.51 | 0.05 |
| 2021/6/13 8:30  | 0.735 | 25.6 | 100.50 | 0.05 |
| 2021/6/13 8:40  | 0.731 | 25.6 | 100.49 | 0.08 |
| 2021/6/13 8:50  | 0.731 | 25.6 | 100.49 | 0.05 |
| 2021/6/13 9:00  | 0.735 | 25.6 | 100.49 | 0.06 |
| 2021/6/13 9:10  | 0.731 | 25.6 | 100.49 | 0.05 |
| 2021/6/13 9:20  | 0.731 | 25.6 | 100.49 | 0.05 |
| 2021/6/13 9:30  | 0.731 | 25.6 | 100.49 | 0.07 |
| 2021/6/13 9:40  | 0.731 | 25.6 | 100.50 | 0.05 |
| 2021/6/13 9:50  | 0.725 | 25.6 | 100.50 | 0.07 |
| 2021/6/13 10:00 | 0.735 | 25.6 | 100.51 | 0.05 |
| 2021/6/13 10:10 | 0.735 | 25.6 | 100.53 | 0.06 |
| 2021/6/13 10:20 | 0.735 | 25.6 | 100.54 | 0.07 |
| 2021/6/13 10:30 | 0.738 | 25.6 | 100.54 | 0.05 |
| 2021/6/13 10:40 | 0.728 | 25.6 | 100.54 | 0.07 |
| 2021/6/13 10:50 | 0.735 | 25.6 | 100.54 | 0.06 |
| 2021/6/13 11:00 | 0.731 | 25.6 | 100.54 | 0.06 |
| 2021/6/13 11:10 | 0.738 | 25.6 | 100.54 | 0.07 |
| 2021/6/13 11:20 | 0.738 | 25.6 | 100.53 | 0.06 |
| 2021/6/13 11:30 | 0.727 | 25.5 | 100.53 | 0.08 |
| 2021/6/13 11:40 | 0.728 | 25.4 | 100.53 | 0.09 |
| 2021/6/13 11:50 | 0.745 | 25.3 | 100.51 | 0.06 |
| 2021/6/13 12:00 | 0.740 | 25.4 | 100.51 | 0.07 |
| 2021/6/13 12:10 | 0.743 | 25.4 | 100.51 | 0.06 |
| 2021/6/13 12:20 | 0.742 | 25.5 | 100.50 | 0.07 |
| 2021/6/13 12:30 | 0.739 | 25.5 | 100.50 | 0.07 |
| 2021/6/13 12:40 | 0.742 | 25.5 | 100.50 | 0.06 |
| 2021/6/13 12:50 | 0.738 | 25.6 | 100.49 | 0.05 |
| 2021/6/13 13:00 | 0.738 | 25.6 | 100.47 | 0.06 |
| 2021/6/13 13:10 | 0.735 | 25.6 | 100.46 | 0.07 |
| 2021/6/13 13:20 | 0.741 | 25.6 | 100.47 | 0.06 |
| 2021/6/13 13:30 | 0.735 | 25.6 | 100.49 | 0.06 |
| 2021/6/13 13:40 | 0.738 | 25.6 | 100.47 | 0.06 |
| 2021/6/13 13:50 | 0.735 | 25.6 | 100.49 | 0.06 |
| 2021/6/13 14:00 | 0.738 | 25.6 | 100.49 | 0.06 |

|                 |       |      |        |      |
|-----------------|-------|------|--------|------|
| 2021/6/13 14:10 | 0.728 | 25.6 | 100.49 | 0.06 |
| 2021/6/13 14:20 | 0.731 | 25.6 | 100.49 | 0.07 |
| 2021/6/13 14:30 | 0.735 | 25.6 | 100.49 | 0.06 |
| 2021/6/13 14:40 | 0.735 | 25.6 | 100.49 | 0.06 |
| 2021/6/13 14:50 | 0.738 | 25.6 | 100.47 | 0.06 |
| 2021/6/13 15:00 | 0.735 | 25.6 | 100.47 | 0.07 |
| 2021/6/13 15:10 | 0.735 | 25.6 | 100.47 | 0.06 |
| 2021/6/13 15:20 | 0.731 | 25.6 | 100.46 | 0.07 |
| 2021/6/13 15:30 | 0.735 | 25.6 | 100.44 | 0.06 |
| 2021/6/13 15:40 | 0.735 | 25.6 | 100.43 | 0.06 |
| 2021/6/13 15:50 | 0.731 | 25.6 | 100.44 | 0.07 |
| 2021/6/13 16:00 | 0.735 | 25.6 | 100.44 | 0.07 |
| 2021/6/13 16:10 | 0.731 | 25.6 | 100.43 | 0.05 |
| 2021/6/13 16:20 | 0.728 | 25.6 | 100.40 | 0.06 |
| 2021/6/13 16:30 | 0.727 | 25.7 | 100.40 | 0.06 |
| 2021/6/13 16:40 | 0.727 | 25.7 | 100.41 | 0.05 |
| 2021/6/13 16:50 | 0.724 | 25.7 | 100.41 | 0.07 |
| 2021/6/13 17:00 | 0.727 | 25.7 | 100.41 | 0.06 |
| 2021/6/13 17:10 | 0.724 | 25.7 | 100.41 | 0.07 |
| 2021/6/13 17:20 | 0.731 | 25.6 | 100.41 | 0.06 |
| 2021/6/13 17:30 | 0.731 | 25.6 | 100.40 | 0.07 |
| 2021/6/13 17:40 | 0.728 | 25.6 | 100.38 | 0.07 |
| 2021/6/13 17:50 | 0.731 | 25.6 | 100.40 | 0.05 |
| 2021/6/13 18:00 | 0.725 | 25.6 | 100.41 | 0.07 |
| 2021/6/13 18:10 | 0.728 | 25.6 | 100.43 | 0.06 |
| 2021/6/13 18:20 | 0.731 | 25.6 | 100.44 | 0.07 |
| 2021/6/13 18:30 | 0.728 | 25.6 | 100.46 | 0.07 |
| 2021/6/13 18:40 | 0.731 | 25.6 | 100.46 | 0.07 |
| 2021/6/13 18:50 | 0.736 | 25.5 | 100.46 | 0.07 |
| 2021/6/13 19:00 | 0.736 | 25.5 | 100.46 | 0.07 |
| 2021/6/13 19:10 | 0.733 | 25.5 | 100.46 | 0.07 |
| 2021/6/13 19:20 | 0.730 | 25.5 | 100.46 | 0.08 |
| 2021/6/13 19:30 | 0.730 | 25.5 | 100.46 | 0.07 |
| 2021/6/13 19:40 | 0.730 | 25.5 | 100.46 | 0.08 |
| 2021/6/13 19:50 | 0.730 | 25.5 | 100.46 | 0.07 |
| 2021/6/13 20:00 | 0.727 | 25.5 | 100.47 | 0.07 |
| 2021/6/13 20:10 | 0.731 | 25.4 | 100.47 | 0.08 |
| 2021/6/13 20:20 | 0.731 | 25.4 | 100.47 | 0.08 |
| 2021/6/13 20:30 | 0.731 | 25.4 | 100.47 | 0.07 |
| 2021/6/13 20:40 | 0.731 | 25.4 | 100.49 | 0.07 |
| 2021/6/13 20:50 | 0.731 | 25.4 | 100.49 | 0.07 |
| 2021/6/13 21:00 | 0.728 | 25.4 | 100.50 | 0.07 |
| 2021/6/13 21:10 | 0.728 | 25.4 | 100.51 | 0.07 |
| 2021/6/13 21:20 | 0.728 | 25.4 | 100.53 | 0.07 |
| 2021/6/13 21:30 | 0.728 | 25.4 | 100.53 | 0.07 |
| 2021/6/13 21:40 | 0.728 | 25.4 | 100.53 | 0.07 |
| 2021/6/13 21:50 | 0.725 | 25.4 | 100.53 | 0.08 |
| 2021/6/13 22:00 | 0.725 | 25.4 | 100.51 | 0.07 |
| 2021/6/13 22:10 | 0.725 | 25.4 | 100.50 | 0.08 |
| 2021/6/13 22:20 | 0.725 | 25.4 | 100.50 | 0.07 |
| 2021/6/13 22:30 | 0.725 | 25.4 | 100.49 | 0.07 |
| 2021/6/13 22:40 | 0.725 | 25.4 | 100.49 | 0.07 |
| 2021/6/13 22:50 | 0.725 | 25.4 | 100.47 | 0.07 |
| 2021/6/13 23:00 | 0.725 | 25.4 | 100.46 | 0.07 |
| 2021/6/13 23:10 | 0.725 | 25.4 | 100.43 | 0.07 |
| 2021/6/13 23:20 | 0.729 | 25.3 | 100.44 | 0.07 |

|                 |       |      |        |      |
|-----------------|-------|------|--------|------|
| 2021/6/13 23:30 | 0.729 | 25.3 | 100.43 | 0.08 |
| 2021/6/13 23:40 | 0.729 | 25.3 | 100.40 | 0.08 |
| 2021/6/13 23:50 | 0.729 | 25.3 | 100.37 | 0.08 |
| 2021/6/14 0:00  | 0.726 | 25.3 | 100.34 | 0.07 |
| 2021/6/14 0:10  | 0.726 | 25.3 | 100.34 | 0.07 |
| 2021/6/14 0:20  | 0.726 | 25.3 | 100.31 | 0.07 |
| 2021/6/14 0:30  | 0.726 | 25.3 | 100.29 | 0.08 |
| 2021/6/14 0:40  | 0.726 | 25.3 | 100.29 | 0.08 |
| 2021/6/14 0:50  | 0.726 | 25.3 | 100.31 | 0.07 |
| 2021/6/14 1:00  | 0.723 | 25.3 | 100.29 | 0.07 |
| 2021/6/14 1:10  | 0.723 | 25.3 | 100.29 | 0.07 |
| 2021/6/14 1:20  | 0.723 | 25.3 | 100.29 | 0.07 |
| 2021/6/14 1:30  | 0.727 | 25.2 | 100.27 | 0.08 |
| 2021/6/14 1:40  | 0.727 | 25.2 | 100.27 | 0.07 |
| 2021/6/14 1:50  | 0.727 | 25.2 | 100.27 | 0.08 |
| 2021/6/14 2:00  | 0.727 | 25.2 | 100.24 | 0.07 |
| 2021/6/14 2:10  | 0.727 | 25.2 | 100.24 | 0.07 |
| 2021/6/14 2:20  | 0.727 | 25.2 | 100.24 | 0.07 |
| 2021/6/14 2:30  | 0.727 | 25.2 | 100.24 | 0.07 |
| 2021/6/14 2:40  | 0.727 | 25.2 | 100.24 | 0.08 |
| 2021/6/14 2:50  | 0.727 | 25.2 | 100.25 | 0.08 |
| 2021/6/14 3:00  | 0.727 | 25.2 | 100.24 | 0.07 |
| 2021/6/14 3:10  | 0.727 | 25.2 | 100.24 | 0.08 |
| 2021/6/14 3:20  | 0.727 | 25.2 | 100.24 | 0.07 |
| 2021/6/14 3:30  | 0.727 | 25.2 | 100.22 | 0.08 |
| 2021/6/14 3:40  | 0.724 | 25.2 | 100.19 | 0.08 |
| 2021/6/14 3:50  | 0.724 | 25.2 | 100.18 | 0.08 |
| 2021/6/14 4:00  | 0.724 | 25.2 | 100.16 | 0.07 |
| 2021/6/14 4:10  | 0.724 | 25.2 | 100.15 | 0.07 |
| 2021/6/14 4:20  | 0.724 | 25.2 | 100.13 | 0.08 |
| 2021/6/14 4:30  | 0.724 | 25.2 | 100.15 | 0.08 |
| 2021/6/14 4:40  | 0.724 | 25.2 | 100.16 | 0.08 |
| 2021/6/14 4:50  | 0.724 | 25.2 | 100.16 | 0.07 |
| 2021/6/14 5:00  | 0.721 | 25.2 | 100.16 | 0.07 |
| 2021/6/14 5:10  | 0.721 | 25.2 | 100.18 | 0.08 |
| 2021/6/14 5:20  | 0.721 | 25.2 | 100.19 | 0.08 |
| 2021/6/14 5:30  | 0.721 | 25.2 | 100.22 | 0.08 |
| 2021/6/14 5:40  | 0.721 | 25.2 | 100.22 | 0.08 |
| 2021/6/14 5:50  | 0.725 | 25.1 | 100.21 | 0.08 |
| 2021/6/14 6:00  | 0.725 | 25.1 | 100.22 | 0.08 |
| 2021/6/14 6:10  | 0.725 | 25.1 | 100.24 | 0.08 |
| 2021/6/14 6:20  | 0.725 | 25.1 | 100.24 | 0.08 |
| 2021/6/14 6:30  | 0.718 | 25.2 | 100.22 | 0.06 |
| 2021/6/14 6:40  | 0.721 | 25.2 | 100.25 | 0.05 |
| 2021/6/14 6:50  | 0.721 | 25.2 | 100.25 | 0.05 |
| 2021/6/14 7:00  | 0.720 | 25.3 | 100.21 | 0.05 |
| 2021/6/14 7:10  | 0.719 | 25.4 | 100.19 | 0.05 |
| 2021/6/14 7:20  | 0.719 | 25.4 | 100.21 | 0.05 |
| 2021/6/14 7:30  | 0.725 | 25.4 | 100.19 | 0.05 |
| 2021/6/14 7:40  | 0.721 | 25.5 | 100.21 | 0.05 |
| 2021/6/14 7:50  | 0.721 | 25.5 | 100.24 | 0.07 |
| 2021/6/14 8:00  | 0.721 | 25.5 | 100.24 | 0.04 |
| 2021/6/14 8:10  | 0.721 | 25.5 | 100.22 | 0.05 |
| 2021/6/14 8:20  | 0.714 | 25.5 | 100.22 | 0.07 |
| 2021/6/14 8:30  | 0.729 | 25.3 | 100.22 | 0.07 |
| 2021/6/14 8:40  | 0.729 | 25.3 | 100.22 | 0.05 |

|                 |       |      |        |      |
|-----------------|-------|------|--------|------|
| 2021/6/14 8:50  | 0.729 | 25.3 | 100.24 | 0.05 |
| 2021/6/14 9:00  | 0.725 | 25.4 | 100.22 | 0.05 |
| 2021/6/14 9:10  | 0.728 | 25.4 | 100.21 | 0.04 |
| 2021/6/14 9:20  | 0.724 | 25.5 | 100.21 | 0.06 |
| 2021/6/14 9:30  | 0.724 | 25.5 | 100.22 | 0.06 |
| 2021/6/14 9:40  | 0.719 | 25.6 | 100.21 | 0.05 |
| 2021/6/14 9:50  | 0.722 | 25.6 | 100.21 | 0.05 |
| 2021/6/14 10:00 | 0.719 | 25.6 | 100.21 | 0.07 |
| 2021/6/14 10:10 | 0.719 | 25.6 | 100.19 | 0.05 |
| 2021/6/14 10:20 | 0.722 | 25.6 | 100.19 | 0.05 |
| 2021/6/14 10:30 | 0.719 | 25.6 | 100.21 | 0.07 |
| 2021/6/14 10:40 | 0.716 | 25.6 | 100.21 | 0.06 |
| 2021/6/14 10:50 | 0.719 | 25.6 | 100.21 | 0.05 |
| 2021/6/14 11:00 | 0.722 | 25.6 | 100.21 | 0.05 |
| 2021/6/14 11:10 | 0.722 | 25.6 | 100.21 | 0.05 |
| 2021/6/14 11:20 | 0.722 | 25.6 | 100.21 | 0.07 |
| 2021/6/14 11:30 | 0.725 | 25.6 | 100.19 | 0.05 |
| 2021/6/14 11:40 | 0.725 | 25.6 | 100.18 | 0.05 |
| 2021/6/14 11:50 | 0.725 | 25.6 | 100.18 | 0.07 |
| 2021/6/14 12:00 | 0.725 | 25.6 | 100.18 | 0.04 |
| 2021/6/14 12:10 | 0.728 | 25.6 | 100.16 | 0.06 |
| 2021/6/14 12:20 | 0.725 | 25.6 | 100.16 | 0.05 |
| 2021/6/14 12:30 | 0.728 | 25.6 | 100.16 | 0.06 |
| 2021/6/14 12:40 | 0.731 | 25.6 | 100.15 | 0.06 |
| 2021/6/14 12:50 | 0.735 | 25.6 | 100.15 | 0.05 |
| 2021/6/14 13:00 | 0.731 | 25.6 | 100.13 | 0.06 |
| 2021/6/14 13:10 | 0.731 | 25.6 | 100.13 | 0.04 |
| 2021/6/14 13:20 | 0.728 | 25.6 | 100.13 | 0.06 |
| 2021/6/14 13:30 | 0.731 | 25.6 | 100.12 | 0.07 |
| 2021/6/14 13:40 | 0.735 | 25.6 | 100.10 | 0.05 |
| 2021/6/14 13:50 | 0.738 | 25.6 | 100.10 | 0.05 |
| 2021/6/14 14:00 | 0.741 | 25.6 | 100.10 | 0.06 |
| 2021/6/14 14:10 | 0.741 | 25.6 | 100.09 | 0.04 |
| 2021/6/14 14:20 | 0.735 | 25.6 | 100.07 | 0.06 |
| 2021/6/14 14:30 | 0.738 | 25.6 | 100.07 | 0.07 |
| 2021/6/14 14:40 | 0.744 | 25.6 | 100.06 | 0.07 |
| 2021/6/14 14:50 | 0.744 | 25.6 | 100.06 | 0.05 |
| 2021/6/14 15:00 | 0.744 | 25.6 | 100.05 | 0.07 |
| 2021/6/14 15:10 | 0.747 | 25.6 | 100.03 | 0.06 |
| 2021/6/14 15:20 | 0.747 | 25.6 | 100.02 | 0.06 |
| 2021/6/14 15:30 | 0.744 | 25.6 | 100.02 | 0.07 |
| 2021/6/14 15:40 | 0.753 | 25.6 | 100.00 | 0.06 |
| 2021/6/14 15:50 | 0.750 | 25.6 | 100.02 | 0.06 |
| 2021/6/14 16:00 | 0.756 | 25.6 | 100.00 | 0.06 |
| 2021/6/14 16:10 | 0.756 | 25.6 | 99.99  | 0.05 |
| 2021/6/14 16:20 | 0.753 | 25.6 | 99.99  | 0.06 |
| 2021/6/14 16:30 | 0.753 | 25.6 | 99.97  | 0.07 |
| 2021/6/14 16:40 | 0.759 | 25.6 | 99.97  | 0.07 |
| 2021/6/14 16:50 | 0.759 | 25.6 | 99.97  | 0.06 |
| 2021/6/14 17:00 | 0.759 | 25.6 | 99.96  | 0.07 |
| 2021/6/14 17:10 | 0.753 | 25.6 | 99.96  | 0.07 |
| 2021/6/14 17:20 | 0.756 | 25.6 | 99.96  | 0.07 |
| 2021/6/14 17:30 | 0.756 | 25.6 | 99.96  | 0.05 |
| 2021/6/14 17:40 | 0.747 | 25.6 | 99.96  | 0.07 |
| 2021/6/14 17:50 | 0.750 | 25.6 | 99.94  | 0.07 |
| 2021/6/14 18:00 | 0.748 | 25.5 | 99.94  | 0.07 |

|                 |       |      |        |      |
|-----------------|-------|------|--------|------|
| 2021/6/14 18:10 | 0.762 | 25.4 | 99.94  | 0.07 |
| 2021/6/14 18:20 | 0.765 | 25.4 | 99.94  | 0.06 |
| 2021/6/14 18:30 | 0.767 | 25.5 | 99.94  | 0.07 |
| 2021/6/14 18:40 | 0.767 | 25.5 | 99.94  | 0.07 |
| 2021/6/14 18:50 | 0.763 | 25.5 | 99.94  | 0.07 |
| 2021/6/14 19:00 | 0.763 | 25.5 | 99.96  | 0.08 |
| 2021/6/14 19:10 | 0.757 | 25.5 | 99.97  | 0.08 |
| 2021/6/14 19:20 | 0.762 | 25.4 | 99.97  | 0.08 |
| 2021/6/14 19:30 | 0.759 | 25.4 | 99.97  | 0.08 |
| 2021/6/14 19:40 | 0.759 | 25.4 | 99.97  | 0.08 |
| 2021/6/14 19:50 | 0.759 | 25.4 | 99.97  | 0.08 |
| 2021/6/14 20:00 | 0.756 | 25.4 | 99.97  | 0.08 |
| 2021/6/14 20:10 | 0.756 | 25.4 | 99.99  | 0.08 |
| 2021/6/14 20:20 | 0.756 | 25.4 | 100.00 | 0.08 |
| 2021/6/14 20:30 | 0.749 | 25.4 | 100.02 | 0.09 |
| 2021/6/14 20:40 | 0.749 | 25.4 | 100.03 | 0.08 |
| 2021/6/14 20:50 | 0.749 | 25.4 | 100.05 | 0.08 |
| 2021/6/14 21:00 | 0.754 | 25.3 | 100.06 | 0.08 |
| 2021/6/14 21:10 | 0.754 | 25.3 | 100.06 | 0.08 |
| 2021/6/14 21:20 | 0.754 | 25.3 | 100.05 | 0.08 |
| 2021/6/14 21:30 | 0.754 | 25.3 | 100.03 | 0.08 |
| 2021/6/14 21:40 | 0.751 | 25.3 | 100.02 | 0.08 |
| 2021/6/14 21:50 | 0.751 | 25.3 | 100.02 | 0.08 |
| 2021/6/14 22:00 | 0.751 | 25.3 | 100.02 | 0.08 |
| 2021/6/14 22:10 | 0.751 | 25.3 | 100.03 | 0.08 |
| 2021/6/14 22:20 | 0.751 | 25.3 | 100.03 | 0.09 |
| 2021/6/14 22:30 | 0.751 | 25.3 | 100.02 | 0.08 |
| 2021/6/14 22:40 | 0.751 | 25.3 | 100.02 | 0.08 |
| 2021/6/14 22:50 | 0.751 | 25.3 | 100.00 | 0.08 |
| 2021/6/14 23:00 | 0.751 | 25.3 | 100.00 | 0.07 |
| 2021/6/14 23:10 | 0.751 | 25.3 | 99.99  | 0.08 |
| 2021/6/14 23:20 | 0.751 | 25.3 | 99.97  | 0.08 |
| 2021/6/14 23:30 | 0.751 | 25.3 | 99.97  | 0.08 |
| 2021/6/14 23:40 | 0.751 | 25.3 | 99.97  | 0.08 |
| 2021/6/14 23:50 | 0.751 | 25.3 | 99.94  | 0.08 |
| 2021/6/15 0:00  | 0.751 | 25.3 | 99.93  | 0.07 |
| 2021/6/15 0:10  | 0.751 | 25.3 | 99.91  | 0.08 |
| 2021/6/15 0:20  | 0.751 | 25.3 | 99.91  | 0.08 |
| 2021/6/15 0:30  | 0.751 | 25.3 | 99.88  | 0.08 |
| 2021/6/15 0:40  | 0.751 | 25.3 | 99.87  | 0.08 |
| 2021/6/15 0:50  | 0.751 | 25.3 | 99.87  | 0.08 |
| 2021/6/15 1:00  | 0.751 | 25.3 | 99.88  | 0.08 |
| 2021/6/15 1:10  | 0.751 | 25.3 | 99.87  | 0.07 |
| 2021/6/15 1:20  | 0.751 | 25.3 | 99.83  | 0.08 |
| 2021/6/15 1:30  | 0.755 | 25.2 | 99.83  | 0.08 |
| 2021/6/15 1:40  | 0.752 | 25.2 | 99.84  | 0.08 |
| 2021/6/15 1:50  | 0.752 | 25.2 | 99.83  | 0.08 |
| 2021/6/15 2:00  | 0.752 | 25.2 | 99.81  | 0.08 |
| 2021/6/15 2:10  | 0.752 | 25.2 | 99.80  | 0.08 |
| 2021/6/15 2:20  | 0.752 | 25.2 | 99.78  | 0.08 |
| 2021/6/15 2:30  | 0.749 | 25.2 | 99.77  | 0.08 |
| 2021/6/15 2:40  | 0.749 | 25.2 | 99.77  | 0.09 |
| 2021/6/15 2:50  | 0.749 | 25.2 | 99.77  | 0.08 |
| 2021/6/15 3:00  | 0.749 | 25.2 | 99.75  | 0.08 |
| 2021/6/15 3:10  | 0.749 | 25.2 | 99.74  | 0.08 |
| 2021/6/15 3:20  | 0.749 | 25.2 | 99.74  | 0.07 |

|                 |       |      |       |      |
|-----------------|-------|------|-------|------|
| 2021/6/15 3:30  | 0.749 | 25.2 | 99.74 | 0.08 |
| 2021/6/15 3:40  | 0.749 | 25.2 | 99.75 | 0.08 |
| 2021/6/15 3:50  | 0.749 | 25.2 | 99.75 | 0.08 |
| 2021/6/15 4:00  | 0.749 | 25.2 | 99.74 | 0.08 |
| 2021/6/15 4:10  | 0.749 | 25.2 | 99.75 | 0.08 |
| 2021/6/15 4:20  | 0.749 | 25.2 | 99.75 | 0.08 |
| 2021/6/15 4:30  | 0.749 | 25.2 | 99.75 | 0.08 |
| 2021/6/15 4:40  | 0.749 | 25.2 | 99.75 | 0.07 |
| 2021/6/15 4:50  | 0.749 | 25.2 | 99.75 | 0.07 |
| 2021/6/15 5:00  | 0.749 | 25.2 | 99.75 | 0.07 |
| 2021/6/15 5:10  | 0.749 | 25.2 | 99.75 | 0.08 |
| 2021/6/15 5:20  | 0.749 | 25.2 | 99.77 | 0.08 |
| 2021/6/15 5:30  | 0.749 | 25.2 | 99.77 | 0.08 |
| 2021/6/15 5:40  | 0.749 | 25.2 | 99.77 | 0.07 |
| 2021/6/15 5:50  | 0.749 | 25.2 | 99.78 | 0.07 |
| 2021/6/15 6:00  | 0.749 | 25.2 | 99.78 | 0.08 |
| 2021/6/15 6:10  | 0.749 | 25.2 | 99.77 | 0.07 |
| 2021/6/15 6:20  | 0.749 | 25.2 | 99.78 | 0.07 |
| 2021/6/15 6:30  | 0.746 | 25.2 | 99.78 | 0.05 |
| 2021/6/15 6:40  | 0.749 | 25.2 | 99.78 | 0.05 |
| 2021/6/15 6:50  | 0.745 | 25.3 | 99.78 | 0.06 |
| 2021/6/15 7:00  | 0.751 | 25.3 | 99.78 | 0.05 |
| 2021/6/15 7:10  | 0.746 | 25.4 | 99.80 | 0.06 |
| 2021/6/15 7:20  | 0.746 | 25.4 | 99.80 | 0.07 |
| 2021/6/15 7:30  | 0.742 | 25.5 | 99.80 | 0.06 |
| 2021/6/15 7:40  | 0.745 | 25.5 | 99.81 | 0.05 |
| 2021/6/15 7:50  | 0.744 | 25.6 | 99.81 | 0.05 |
| 2021/6/15 8:00  | 0.744 | 25.6 | 99.83 | 0.06 |
| 2021/6/15 8:10  | 0.744 | 25.6 | 99.83 | 0.07 |
| 2021/6/15 8:20  | 0.744 | 25.6 | 99.84 | 0.05 |
| 2021/6/15 8:30  | 0.744 | 25.6 | 99.83 | 0.05 |
| 2021/6/15 8:40  | 0.747 | 25.6 | 99.83 | 0.06 |
| 2021/6/15 8:50  | 0.747 | 25.6 | 99.83 | 0.07 |
| 2021/6/15 9:00  | 0.750 | 25.6 | 99.83 | 0.05 |
| 2021/6/15 9:10  | 0.750 | 25.6 | 99.81 | 0.06 |
| 2021/6/15 9:20  | 0.750 | 25.6 | 99.80 | 0.07 |
| 2021/6/15 9:30  | 0.747 | 25.6 | 99.80 | 0.06 |
| 2021/6/15 9:40  | 0.750 | 25.6 | 99.80 | 0.05 |
| 2021/6/15 9:50  | 0.747 | 25.6 | 99.80 | 0.06 |
| 2021/6/15 10:00 | 0.744 | 25.6 | 99.81 | 0.08 |
| 2021/6/15 10:10 | 0.747 | 25.6 | 99.81 | 0.06 |
| 2021/6/15 10:20 | 0.750 | 25.6 | 99.81 | 0.05 |
| 2021/6/15 10:30 | 0.753 | 25.6 | 99.81 | 0.06 |
| 2021/6/15 10:40 | 0.753 | 25.6 | 99.80 | 0.07 |
| 2021/6/15 10:50 | 0.753 | 25.6 | 99.81 | 0.05 |
| 2021/6/15 11:00 | 0.744 | 25.6 | 99.81 | 0.07 |
| 2021/6/15 11:10 | 0.750 | 25.6 | 99.80 | 0.07 |
| 2021/6/15 11:20 | 0.753 | 25.6 | 99.80 | 0.05 |
| 2021/6/15 11:30 | 0.753 | 25.6 | 99.78 | 0.07 |
| 2021/6/15 11:40 | 0.750 | 25.6 | 99.80 | 0.05 |
| 2021/6/15 11:50 | 0.753 | 25.6 | 99.78 | 0.07 |
| 2021/6/15 12:00 | 0.750 | 25.6 | 99.77 | 0.06 |
| 2021/6/15 12:10 | 0.753 | 25.6 | 99.75 | 0.07 |
| 2021/6/15 12:20 | 0.753 | 25.6 | 99.74 | 0.06 |
| 2021/6/15 12:30 | 0.753 | 25.6 | 99.74 | 0.06 |
| 2021/6/15 12:40 | 0.753 | 25.6 | 99.74 | 0.06 |

|                 |       |      |        |      |
|-----------------|-------|------|--------|------|
| 2021/6/15 12:50 | 0.753 | 25.6 | 99.72  | 0.07 |
| 2021/6/15 13:00 | 0.759 | 25.6 | 99.72  | 0.06 |
| 2021/6/15 13:10 | 0.759 | 25.6 | 99.72  | 0.06 |
| 2021/6/15 13:20 | 0.753 | 25.6 | 99.72  | 0.07 |
| 2021/6/15 13:30 | 0.756 | 25.6 | 99.71  | 0.05 |
| 2021/6/15 13:40 | 0.750 | 25.6 | 99.71  | 0.06 |
| 2021/6/15 13:50 | 0.754 | 25.5 | 99.71  | 0.06 |
| 2021/6/15 14:00 | 0.757 | 25.5 | 99.69  | 0.05 |
| 2021/6/15 14:10 | 0.751 | 25.5 | 99.71  | 0.07 |
| 2021/6/15 14:20 | 0.750 | 25.6 | 99.71  | 0.06 |
| 2021/6/15 14:30 | 0.750 | 25.6 | 99.72  | 0.06 |
| 2021/6/15 14:40 | 0.750 | 25.6 | 99.72  | 0.07 |
| 2021/6/15 14:50 | 0.750 | 25.6 | 99.74  | 0.06 |
| 2021/6/15 15:00 | 0.747 | 25.6 | 99.74  | 0.07 |
| 2021/6/15 15:10 | 0.753 | 25.6 | 99.74  | 0.05 |
| 2021/6/15 15:20 | 0.750 | 25.6 | 99.72  | 0.07 |
| 2021/6/15 15:30 | 0.750 | 25.6 | 99.72  | 0.07 |
| 2021/6/15 15:40 | 0.753 | 25.6 | 99.74  | 0.05 |
| 2021/6/15 15:50 | 0.728 | 25.6 | 99.75  | 0.07 |
| 2021/6/15 16:00 | 0.749 | 25.4 | 99.75  | 0.08 |
| 2021/6/15 16:10 | 0.759 | 25.4 | 99.75  | 0.06 |
| 2021/6/15 16:20 | 0.754 | 25.5 | 99.75  | 0.06 |
| 2021/6/15 16:30 | 0.751 | 25.5 | 99.74  | 0.07 |
| 2021/6/15 16:40 | 0.754 | 25.5 | 99.74  | 0.06 |
| 2021/6/15 16:50 | 0.754 | 25.5 | 99.74  | 0.07 |
| 2021/6/15 17:00 | 0.750 | 25.6 | 99.74  | 0.05 |
| 2021/6/15 17:10 | 0.741 | 25.6 | 99.74  | 0.07 |
| 2021/6/15 17:20 | 0.747 | 25.6 | 99.75  | 0.07 |
| 2021/6/15 17:30 | 0.750 | 25.6 | 99.75  | 0.06 |
| 2021/6/15 17:40 | 0.744 | 25.6 | 99.77  | 0.08 |
| 2021/6/15 17:50 | 0.744 | 25.6 | 99.77  | 0.05 |
| 2021/6/15 18:00 | 0.744 | 25.6 | 99.77  | 0.07 |
| 2021/6/15 18:10 | 0.744 | 25.6 | 99.78  | 0.07 |
| 2021/6/15 18:20 | 0.747 | 25.6 | 99.80  | 0.07 |
| 2021/6/15 18:30 | 0.750 | 25.6 | 99.81  | 0.08 |
| 2021/6/15 18:40 | 0.747 | 25.6 | 99.81  | 0.08 |
| 2021/6/15 18:50 | 0.747 | 25.6 | 99.83  | 0.07 |
| 2021/6/15 19:00 | 0.751 | 25.5 | 99.84  | 0.08 |
| 2021/6/15 19:10 | 0.751 | 25.5 | 99.83  | 0.07 |
| 2021/6/15 19:20 | 0.748 | 25.5 | 99.84  | 0.08 |
| 2021/6/15 19:30 | 0.742 | 25.5 | 99.85  | 0.09 |
| 2021/6/15 19:40 | 0.746 | 25.4 | 99.87  | 0.08 |
| 2021/6/15 19:50 | 0.746 | 25.4 | 99.87  | 0.08 |
| 2021/6/15 20:00 | 0.746 | 25.4 | 99.88  | 0.08 |
| 2021/6/15 20:10 | 0.743 | 25.4 | 99.88  | 0.08 |
| 2021/6/15 20:20 | 0.743 | 25.4 | 99.88  | 0.08 |
| 2021/6/15 20:30 | 0.740 | 25.4 | 99.88  | 0.08 |
| 2021/6/15 20:40 | 0.740 | 25.4 | 99.91  | 0.08 |
| 2021/6/15 20:50 | 0.742 | 25.3 | 99.93  | 0.07 |
| 2021/6/15 21:00 | 0.742 | 25.3 | 99.94  | 0.08 |
| 2021/6/15 21:10 | 0.742 | 25.3 | 99.96  | 0.08 |
| 2021/6/15 21:20 | 0.742 | 25.3 | 99.97  | 0.08 |
| 2021/6/15 21:30 | 0.738 | 25.3 | 99.99  | 0.08 |
| 2021/6/15 21:40 | 0.738 | 25.3 | 100.00 | 0.07 |
| 2021/6/15 21:50 | 0.738 | 25.3 | 100.00 | 0.08 |
| 2021/6/15 22:00 | 0.738 | 25.3 | 100.02 | 0.07 |

|                 |       |      |        |      |
|-----------------|-------|------|--------|------|
| 2021/6/15 22:10 | 0.738 | 25.3 | 100.02 | 0.07 |
| 2021/6/15 22:20 | 0.735 | 25.3 | 100.02 | 0.08 |
| 2021/6/15 22:30 | 0.735 | 25.3 | 100.02 | 0.07 |
| 2021/6/15 22:40 | 0.735 | 25.3 | 100.03 | 0.07 |
| 2021/6/15 22:50 | 0.735 | 25.3 | 100.05 | 0.07 |
| 2021/6/15 23:00 | 0.735 | 25.3 | 100.05 | 0.07 |
| 2021/6/15 23:10 | 0.735 | 25.3 | 100.05 | 0.07 |
| 2021/6/15 23:20 | 0.732 | 25.3 | 100.03 | 0.08 |
| 2021/6/15 23:30 | 0.732 | 25.3 | 100.02 | 0.07 |
| 2021/6/15 23:40 | 0.732 | 25.3 | 100.02 | 0.07 |
| 2021/6/15 23:50 | 0.737 | 25.2 | 100.02 | 0.07 |
| 2021/6/16 0:00  | 0.737 | 25.2 | 100.00 | 0.08 |
| 2021/6/16 0:10  | 0.737 | 25.2 | 100.00 | 0.07 |
| 2021/6/16 0:20  | 0.733 | 25.2 | 100.00 | 0.07 |
| 2021/6/16 0:30  | 0.733 | 25.2 | 99.99  | 0.07 |
| 2021/6/16 0:40  | 0.733 | 25.2 | 99.99  | 0.07 |
| 2021/6/16 0:50  | 0.733 | 25.2 | 99.99  | 0.07 |
| 2021/6/16 1:00  | 0.733 | 25.2 | 99.99  | 0.07 |
| 2021/6/16 1:10  | 0.733 | 25.2 | 99.99  | 0.07 |
| 2021/6/16 1:20  | 0.733 | 25.2 | 99.97  | 0.07 |
| 2021/6/16 1:30  | 0.733 | 25.2 | 99.97  | 0.08 |
| 2021/6/16 1:40  | 0.733 | 25.2 | 99.97  | 0.07 |
| 2021/6/16 1:50  | 0.733 | 25.2 | 99.96  | 0.07 |
| 2021/6/16 2:00  | 0.733 | 25.2 | 99.96  | 0.07 |
| 2021/6/16 2:10  | 0.733 | 25.2 | 99.94  | 0.07 |
| 2021/6/16 2:20  | 0.730 | 25.2 | 99.96  | 0.07 |
| 2021/6/16 2:30  | 0.730 | 25.2 | 99.97  | 0.07 |
| 2021/6/16 2:40  | 0.730 | 25.2 | 99.97  | 0.07 |
| 2021/6/16 2:50  | 0.730 | 25.2 | 99.97  | 0.07 |
| 2021/6/16 3:00  | 0.730 | 25.2 | 99.99  | 0.07 |
| 2021/6/16 3:10  | 0.730 | 25.2 | 99.97  | 0.07 |
| 2021/6/16 3:20  | 0.730 | 25.2 | 99.99  | 0.07 |
| 2021/6/16 3:30  | 0.730 | 25.2 | 99.99  | 0.07 |
| 2021/6/16 3:40  | 0.730 | 25.2 | 100.00 | 0.07 |
| 2021/6/16 3:50  | 0.730 | 25.2 | 100.00 | 0.07 |
| 2021/6/16 4:00  | 0.730 | 25.2 | 100.00 | 0.07 |
| 2021/6/16 4:10  | 0.730 | 25.2 | 100.02 | 0.07 |
| 2021/6/16 4:20  | 0.730 | 25.2 | 100.03 | 0.07 |
| 2021/6/16 4:30  | 0.730 | 25.2 | 100.03 | 0.07 |
| 2021/6/16 4:40  | 0.732 | 25.1 | 100.05 | 0.07 |
| 2021/6/16 4:50  | 0.732 | 25.1 | 100.05 | 0.07 |
| 2021/6/16 5:00  | 0.732 | 25.1 | 100.05 | 0.07 |
| 2021/6/16 5:10  | 0.732 | 25.1 | 100.06 | 0.07 |
| 2021/6/16 5:20  | 0.732 | 25.1 | 100.06 | 0.07 |
| 2021/6/16 5:30  | 0.732 | 25.1 | 100.06 | 0.07 |
| 2021/6/16 5:40  | 0.728 | 25.1 | 100.06 | 0.07 |
| 2021/6/16 5:50  | 0.728 | 25.1 | 100.06 | 0.07 |
| 2021/6/16 6:00  | 0.728 | 25.1 | 100.06 | 0.07 |
| 2021/6/16 6:10  | 0.728 | 25.1 | 100.07 | 0.07 |
| 2021/6/16 6:20  | 0.728 | 25.1 | 100.07 | 0.07 |
| 2021/6/16 6:30  | 0.728 | 25.1 | 100.09 | 0.05 |
| 2021/6/16 6:40  | 0.727 | 25.2 | 100.10 | 0.05 |
| 2021/6/16 6:50  | 0.724 | 25.2 | 100.12 | 0.05 |
| 2021/6/16 7:00  | 0.724 | 25.2 | 100.12 | 0.05 |
| 2021/6/16 7:10  | 0.726 | 25.3 | 100.13 | 0.05 |
| 2021/6/16 7:20  | 0.722 | 25.4 | 100.13 | 0.06 |

|                 |       |      |        |      |
|-----------------|-------|------|--------|------|
| 2021/6/16 7:30  | 0.725 | 25.4 | 100.15 | 0.05 |
| 2021/6/16 7:40  | 0.721 | 25.5 | 100.16 | 0.05 |
| 2021/6/16 7:50  | 0.721 | 25.5 | 100.16 | 0.06 |
| 2021/6/16 8:00  | 0.721 | 25.5 | 100.19 | 0.07 |
| 2021/6/16 8:10  | 0.721 | 25.5 | 100.19 | 0.06 |
| 2021/6/16 8:20  | 0.724 | 25.5 | 100.19 | 0.05 |
| 2021/6/16 8:30  | 0.719 | 25.6 | 100.19 | 0.08 |
| 2021/6/16 8:40  | 0.716 | 25.6 | 100.19 | 0.05 |
| 2021/6/16 8:50  | 0.719 | 25.6 | 100.19 | 0.07 |
| 2021/6/16 9:00  | 0.716 | 25.6 | 100.21 | 0.06 |
| 2021/6/16 9:10  | 0.716 | 25.6 | 100.19 | 0.06 |
| 2021/6/16 9:20  | 0.716 | 25.6 | 100.19 | 0.08 |
| 2021/6/16 9:30  | 0.713 | 25.6 | 100.19 | 0.05 |
| 2021/6/16 9:40  | 0.716 | 25.6 | 100.19 | 0.05 |
| 2021/6/16 9:50  | 0.713 | 25.6 | 100.18 | 0.07 |
| 2021/6/16 10:00 | 0.713 | 25.6 | 100.19 | 0.06 |
| 2021/6/16 10:10 | 0.716 | 25.6 | 100.18 | 0.06 |
| 2021/6/16 10:20 | 0.716 | 25.6 | 100.18 | 0.07 |
| 2021/6/16 10:30 | 0.716 | 25.6 | 100.19 | 0.06 |
| 2021/6/16 10:40 | 0.713 | 25.6 | 100.19 | 0.06 |
| 2021/6/16 10:50 | 0.716 | 25.6 | 100.18 | 0.07 |
| 2021/6/16 11:00 | 0.713 | 25.6 | 100.19 | 0.06 |
| 2021/6/16 11:10 | 0.713 | 25.6 | 100.18 | 0.08 |
| 2021/6/16 11:20 | 0.710 | 25.6 | 100.21 | 0.07 |
| 2021/6/16 11:30 | 0.713 | 25.6 | 100.19 | 0.06 |
| 2021/6/16 11:40 | 0.713 | 25.6 | 100.18 | 0.07 |
| 2021/6/16 11:50 | 0.710 | 25.6 | 100.16 | 0.06 |
| 2021/6/16 12:00 | 0.713 | 25.6 | 100.16 | 0.06 |
| 2021/6/16 12:10 | 0.716 | 25.6 | 100.16 | 0.07 |
| 2021/6/16 12:20 | 0.716 | 25.6 | 100.16 | 0.07 |
| 2021/6/16 12:30 | 0.710 | 25.6 | 100.16 | 0.06 |
| 2021/6/16 12:40 | 0.716 | 25.6 | 100.18 | 0.06 |
| 2021/6/16 12:50 | 0.713 | 25.6 | 100.16 | 0.06 |
| 2021/6/16 13:00 | 0.713 | 25.6 | 100.16 | 0.05 |
| 2021/6/16 13:10 | 0.713 | 25.6 | 100.16 | 0.07 |
| 2021/6/16 13:20 | 0.708 | 25.5 | 100.18 | 0.07 |
| 2021/6/16 13:30 | 0.722 | 25.4 | 100.18 | 0.05 |
| 2021/6/16 13:40 | 0.722 | 25.4 | 100.18 | 0.06 |
| 2021/6/16 13:50 | 0.722 | 25.4 | 100.18 | 0.06 |
| 2021/6/16 14:00 | 0.721 | 25.5 | 100.16 | 0.06 |
| 2021/6/16 14:10 | 0.714 | 25.5 | 100.16 | 0.08 |
| 2021/6/16 14:20 | 0.713 | 25.6 | 100.16 | 0.06 |
| 2021/6/16 14:30 | 0.710 | 25.6 | 100.15 | 0.06 |
| 2021/6/16 14:40 | 0.713 | 25.6 | 100.15 | 0.06 |
| 2021/6/16 14:50 | 0.713 | 25.6 | 100.15 | 0.07 |
| 2021/6/16 15:00 | 0.710 | 25.6 | 100.15 | 0.07 |
| 2021/6/16 15:10 | 0.710 | 25.6 | 100.13 | 0.06 |
| 2021/6/16 15:20 | 0.710 | 25.6 | 100.13 | 0.07 |
| 2021/6/16 15:30 | 0.710 | 25.6 | 100.15 | 0.06 |
| 2021/6/16 15:40 | 0.710 | 25.6 | 100.15 | 0.07 |
| 2021/6/16 15:50 | 0.710 | 25.6 | 100.15 | 0.07 |
| 2021/6/16 16:00 | 0.707 | 25.6 | 100.15 | 0.06 |
| 2021/6/16 16:10 | 0.710 | 25.6 | 100.15 | 0.07 |
| 2021/6/16 16:20 | 0.707 | 25.6 | 100.15 | 0.06 |
| 2021/6/16 16:30 | 0.710 | 25.6 | 100.15 | 0.06 |
| 2021/6/16 16:40 | 0.710 | 25.6 | 100.15 | 0.08 |

|                 |       |      |        |      |
|-----------------|-------|------|--------|------|
| 2021/6/16 16:50 | 0.713 | 25.6 | 100.15 | 0.06 |
| 2021/6/16 17:00 | 0.710 | 25.6 | 100.13 | 0.07 |
| 2021/6/16 17:10 | 0.710 | 25.6 | 100.13 | 0.06 |
| 2021/6/16 17:20 | 0.706 | 25.7 | 100.13 | 0.07 |
| 2021/6/16 17:30 | 0.710 | 25.6 | 100.13 | 0.05 |
| 2021/6/16 17:40 | 0.716 | 25.6 | 100.15 | 0.06 |
| 2021/6/16 17:50 | 0.713 | 25.6 | 100.15 | 0.06 |
| 2021/6/16 18:00 | 0.712 | 25.7 | 100.13 | 0.06 |
| 2021/6/16 18:10 | 0.706 | 25.7 | 100.15 | 0.08 |
| 2021/6/16 18:20 | 0.709 | 25.7 | 100.15 | 0.07 |
| 2021/6/16 18:30 | 0.719 | 25.6 | 100.16 | 0.08 |
| 2021/6/16 18:40 | 0.716 | 25.6 | 100.16 | 0.08 |
| 2021/6/16 18:50 | 0.716 | 25.6 | 100.18 | 0.07 |
| 2021/6/16 19:00 | 0.714 | 25.5 | 100.18 | 0.08 |
| 2021/6/16 19:10 | 0.714 | 25.5 | 100.19 | 0.07 |
| 2021/6/16 19:20 | 0.714 | 25.5 | 100.19 | 0.07 |
| 2021/6/16 19:30 | 0.716 | 25.4 | 100.19 | 0.07 |
| 2021/6/16 19:40 | 0.716 | 25.4 | 100.19 | 0.07 |
| 2021/6/16 19:50 | 0.716 | 25.4 | 100.19 | 0.07 |
| 2021/6/16 20:00 | 0.712 | 25.4 | 100.19 | 0.07 |
| 2021/6/16 20:10 | 0.712 | 25.4 | 100.19 | 0.07 |
| 2021/6/16 20:20 | 0.712 | 25.4 | 100.19 | 0.07 |
| 2021/6/16 20:30 | 0.709 | 25.4 | 100.19 | 0.07 |
| 2021/6/16 20:40 | 0.709 | 25.4 | 100.19 | 0.07 |
| 2021/6/16 20:50 | 0.709 | 25.4 | 100.19 | 0.07 |
| 2021/6/16 21:00 | 0.714 | 25.3 | 100.19 | 0.07 |
| 2021/6/16 21:10 | 0.714 | 25.3 | 100.19 | 0.07 |
| 2021/6/16 21:20 | 0.714 | 25.3 | 100.19 | 0.07 |
| 2021/6/16 21:30 | 0.714 | 25.3 | 100.21 | 0.07 |
| 2021/6/16 21:40 | 0.714 | 25.3 | 100.22 | 0.06 |
| 2021/6/16 21:50 | 0.711 | 25.3 | 100.22 | 0.07 |
| 2021/6/16 22:00 | 0.711 | 25.3 | 100.24 | 0.07 |
| 2021/6/16 22:10 | 0.711 | 25.3 | 100.24 | 0.07 |
| 2021/6/16 22:20 | 0.711 | 25.3 | 100.25 | 0.07 |
| 2021/6/16 22:30 | 0.711 | 25.3 | 100.25 | 0.06 |
| 2021/6/16 22:40 | 0.712 | 25.2 | 100.25 | 0.07 |
| 2021/6/16 22:50 | 0.712 | 25.2 | 100.25 | 0.07 |
| 2021/6/16 23:00 | 0.712 | 25.2 | 100.25 | 0.07 |
| 2021/6/16 23:10 | 0.712 | 25.2 | 100.25 | 0.07 |
| 2021/6/16 23:20 | 0.712 | 25.2 | 100.25 | 0.07 |
| 2021/6/16 23:30 | 0.709 | 25.2 | 100.25 | 0.07 |
| 2021/6/16 23:40 | 0.709 | 25.2 | 100.24 | 0.07 |
| 2021/6/16 23:50 | 0.709 | 25.2 | 100.22 | 0.07 |
| 2021/6/17 0:00  | 0.705 | 25.2 | 100.21 | 0.07 |
| 2021/6/17 0:10  | 0.705 | 25.2 | 100.19 | 0.07 |
| 2021/6/17 0:20  | 0.705 | 25.2 | 100.19 | 0.07 |
| 2021/6/17 0:30  | 0.702 | 25.2 | 100.18 | 0.07 |
| 2021/6/17 0:40  | 0.702 | 25.2 | 100.18 | 0.07 |
| 2021/6/17 0:50  | 0.699 | 25.2 | 100.18 | 0.07 |
| 2021/6/17 1:00  | 0.699 | 25.2 | 100.18 | 0.07 |
| 2021/6/17 1:10  | 0.700 | 25.1 | 100.16 | 0.07 |
| 2021/6/17 1:20  | 0.697 | 25.1 | 100.16 | 0.07 |
| 2021/6/17 1:30  | 0.697 | 25.1 | 100.16 | 0.07 |
| 2021/6/17 1:40  | 0.694 | 25.1 | 100.16 | 0.07 |
| 2021/6/17 1:50  | 0.694 | 25.1 | 100.15 | 0.07 |
| 2021/6/17 2:00  | 0.691 | 25.1 | 100.13 | 0.08 |

|                 |       |      |        |      |
|-----------------|-------|------|--------|------|
| 2021/6/17 2:10  | 0.691 | 25.1 | 100.13 | 0.07 |
| 2021/6/17 2:20  | 0.688 | 25.1 | 100.13 | 0.07 |
| 2021/6/17 2:30  | 0.689 | 25.0 | 100.13 | 0.07 |
| 2021/6/17 2:40  | 0.689 | 25.0 | 100.13 | 0.07 |
| 2021/6/17 2:50  | 0.685 | 25.0 | 100.12 | 0.07 |
| 2021/6/17 3:00  | 0.685 | 25.0 | 100.13 | 0.07 |
| 2021/6/17 3:10  | 0.682 | 25.0 | 100.13 | 0.07 |
| 2021/6/17 3:20  | 0.682 | 25.0 | 100.13 | 0.07 |
| 2021/6/17 3:30  | 0.682 | 25.0 | 100.13 | 0.07 |
| 2021/6/17 3:40  | 0.682 | 25.0 | 100.12 | 0.07 |
| 2021/6/17 3:50  | 0.682 | 25.0 | 100.12 | 0.07 |
| 2021/6/17 4:00  | 0.679 | 25.0 | 100.13 | 0.07 |
| 2021/6/17 4:10  | 0.679 | 25.0 | 100.13 | 0.07 |
| 2021/6/17 4:20  | 0.679 | 25.0 | 100.13 | 0.08 |
| 2021/6/17 4:30  | 0.679 | 25.0 | 100.13 | 0.08 |
| 2021/6/17 4:40  | 0.679 | 25.0 | 100.15 | 0.08 |
| 2021/6/17 4:50  | 0.679 | 25.0 | 100.15 | 0.07 |
| 2021/6/17 5:00  | 0.676 | 25.0 | 100.15 | 0.07 |
| 2021/6/17 5:10  | 0.676 | 25.0 | 100.15 | 0.07 |
| 2021/6/17 5:20  | 0.676 | 25.0 | 100.15 | 0.07 |
| 2021/6/17 5:30  | 0.676 | 25.0 | 100.16 | 0.07 |
| 2021/6/17 5:40  | 0.677 | 24.9 | 100.16 | 0.07 |
| 2021/6/17 5:50  | 0.677 | 24.9 | 100.16 | 0.07 |
| 2021/6/17 6:00  | 0.677 | 24.9 | 100.16 | 0.07 |
| 2021/6/17 6:10  | 0.677 | 24.9 | 100.16 | 0.07 |
| 2021/6/17 6:20  | 0.674 | 24.9 | 100.16 | 0.08 |
| 2021/6/17 6:30  | 0.674 | 24.9 | 100.16 | 0.08 |
| 2021/6/17 6:40  | 0.670 | 25.0 | 100.16 | 0.05 |
| 2021/6/17 6:50  | 0.675 | 25.1 | 100.16 | 0.06 |
| 2021/6/17 7:00  | 0.674 | 25.2 | 100.16 | 0.06 |
| 2021/6/17 7:10  | 0.674 | 25.2 | 100.16 | 0.06 |
| 2021/6/17 7:20  | 0.674 | 25.2 | 100.16 | 0.06 |
| 2021/6/17 7:30  | 0.670 | 25.3 | 100.16 | 0.07 |
| 2021/6/17 7:40  | 0.673 | 25.3 | 100.16 | 0.06 |
| 2021/6/17 7:50  | 0.669 | 25.4 | 100.16 | 0.06 |
| 2021/6/17 8:00  | 0.672 | 25.4 | 100.18 | 0.07 |
| 2021/6/17 8:10  | 0.669 | 25.4 | 100.18 | 0.07 |
| 2021/6/17 8:20  | 0.672 | 25.4 | 100.19 | 0.06 |
| 2021/6/17 8:30  | 0.675 | 25.4 | 100.18 | 0.06 |
| 2021/6/17 8:40  | 0.671 | 25.5 | 100.18 | 0.06 |
| 2021/6/17 8:50  | 0.671 | 25.5 | 100.18 | 0.06 |
| 2021/6/17 9:00  | 0.675 | 25.5 | 100.18 | 0.06 |
| 2021/6/17 9:10  | 0.675 | 25.5 | 100.15 | 0.06 |
| 2021/6/17 9:20  | 0.675 | 25.5 | 100.15 | 0.05 |
| 2021/6/17 9:30  | 0.678 | 25.5 | 100.13 | 0.07 |
| 2021/6/17 9:40  | 0.671 | 25.6 | 100.13 | 0.06 |
| 2021/6/17 9:50  | 0.671 | 25.6 | 100.13 | 0.07 |
| 2021/6/17 10:00 | 0.674 | 25.6 | 100.13 | 0.07 |
| 2021/6/17 10:10 | 0.674 | 25.6 | 100.12 | 0.05 |
| 2021/6/17 10:20 | 0.677 | 25.6 | 100.12 | 0.07 |
| 2021/6/17 10:30 | 0.664 | 25.6 | 100.12 | 0.06 |
| 2021/6/17 10:40 | 0.685 | 25.4 | 100.10 | 0.06 |
| 2021/6/17 10:50 | 0.685 | 25.4 | 100.10 | 0.06 |
| 2021/6/17 11:00 | 0.688 | 25.4 | 100.12 | 0.07 |
| 2021/6/17 11:10 | 0.685 | 25.4 | 100.12 | 0.05 |
| 2021/6/17 11:20 | 0.684 | 25.5 | 100.12 | 0.06 |

|                 |       |      |        |      |
|-----------------|-------|------|--------|------|
| 2021/6/17 11:30 | 0.678 | 25.5 | 100.10 | 0.06 |
| 2021/6/17 11:40 | 0.682 | 25.4 | 100.10 | 0.08 |
| 2021/6/17 11:50 | 0.682 | 25.4 | 100.10 | 0.08 |
| 2021/6/17 12:00 | 0.678 | 25.5 | 100.10 | 0.06 |
| 2021/6/17 12:10 | 0.663 | 25.4 | 100.10 | 0.05 |
| 2021/6/17 12:20 | 0.657 | 25.4 | 100.09 | 0.07 |
| 2021/6/17 12:30 | 0.645 | 25.4 | 100.07 | 0.06 |
| 2021/6/17 12:40 | 0.642 | 25.4 | 100.07 | 0.05 |
| 2021/6/17 12:50 | 0.632 | 25.4 | 100.07 | 0.05 |
| 2021/6/17 13:00 | 0.627 | 25.3 | 100.07 | 0.06 |
| 2021/6/17 13:10 | 0.624 | 25.3 | 100.06 | 0.06 |
| 2021/6/17 13:20 | 0.614 | 25.3 | 100.07 | 0.06 |
| 2021/6/17 13:30 | 0.614 | 25.3 | 100.07 | 0.06 |
| 2021/6/17 13:40 | 0.608 | 25.3 | 100.07 | 0.06 |
| 2021/6/17 13:50 | 0.602 | 25.3 | 100.07 | 0.05 |
| 2021/6/17 14:00 | 0.602 | 25.3 | 100.09 | 0.04 |
| 2021/6/17 14:10 | 0.599 | 25.3 | 100.09 | 0.06 |
| 2021/6/17 14:20 | 0.602 | 25.2 | 100.10 | 0.05 |
| 2021/6/17 14:30 | 0.602 | 25.2 | 100.10 | 0.05 |
| 2021/6/17 14:40 | 0.602 | 25.2 | 100.12 | 0.05 |
| 2021/6/17 14:50 | 0.602 | 25.2 | 100.13 | 0.05 |
| 2021/6/17 15:00 | 0.599 | 25.2 | 100.16 | 0.06 |
| 2021/6/17 15:10 | 0.599 | 25.3 | 100.18 | 0.05 |
| 2021/6/17 15:20 | 0.599 | 25.3 | 100.19 | 0.06 |
| 2021/6/17 15:30 | 0.605 | 25.3 | 100.19 | 0.07 |
| 2021/6/17 15:40 | 0.605 | 25.3 | 100.19 | 0.05 |
| 2021/6/17 15:50 | 0.608 | 25.3 | 100.21 | 0.05 |
| 2021/6/17 16:00 | 0.608 | 25.3 | 100.22 | 0.06 |
| 2021/6/17 16:10 | 0.614 | 25.3 | 100.22 | 0.05 |
| 2021/6/17 16:20 | 0.618 | 25.2 | 100.24 | 0.04 |
| 2021/6/17 16:30 | 0.624 | 25.2 | 100.25 | 0.06 |
| 2021/6/17 16:40 | 0.624 | 25.2 | 100.25 | 0.04 |
| 2021/6/17 16:50 | 0.634 | 25.2 | 100.25 | 0.05 |
| 2021/6/17 17:00 | 0.634 | 25.2 | 100.27 | 0.04 |
| 2021/6/17 17:10 | 0.640 | 25.2 | 100.28 | 0.05 |
| 2021/6/17 17:20 | 0.646 | 25.2 | 100.27 | 0.06 |
| 2021/6/17 17:30 | 0.645 | 25.3 | 100.27 | 0.06 |
| 2021/6/17 17:40 | 0.648 | 25.3 | 100.27 | 0.06 |
| 2021/6/17 17:50 | 0.655 | 25.3 | 100.28 | 0.05 |
| 2021/6/17 18:00 | 0.655 | 25.3 | 100.28 | 0.06 |
| 2021/6/17 18:10 | 0.658 | 25.3 | 100.29 | 0.06 |
| 2021/6/17 18:20 | 0.661 | 25.3 | 100.29 | 0.06 |
| 2021/6/17 18:30 | 0.661 | 25.3 | 100.29 | 0.07 |
| 2021/6/17 18:40 | 0.664 | 25.3 | 100.31 | 0.06 |
| 2021/6/17 18:50 | 0.667 | 25.3 | 100.34 | 0.06 |
| 2021/6/17 19:00 | 0.667 | 25.3 | 100.34 | 0.06 |
| 2021/6/17 19:10 | 0.670 | 25.3 | 100.35 | 0.06 |
| 2021/6/17 19:20 | 0.670 | 25.3 | 100.37 | 0.06 |
| 2021/6/17 19:30 | 0.673 | 25.3 | 100.38 | 0.06 |
| 2021/6/17 19:40 | 0.673 | 25.3 | 100.38 | 0.06 |
| 2021/6/17 19:50 | 0.680 | 25.2 | 100.38 | 0.06 |
| 2021/6/17 20:00 | 0.684 | 25.2 | 100.40 | 0.07 |
| 2021/6/17 20:10 | 0.698 | 25.3 | 100.40 | 0.09 |
| 2021/6/17 20:20 | 0.706 | 25.4 | 100.40 | 0.08 |
| 2021/6/17 20:30 | 0.709 | 25.4 | 100.41 | 0.07 |
| 2021/6/17 20:40 | 0.716 | 25.4 | 100.41 | 0.07 |

|                 |       |      |        |      |
|-----------------|-------|------|--------|------|
| 2021/6/17 20:50 | 0.716 | 25.4 | 100.43 | 0.07 |
| 2021/6/17 21:00 | 0.720 | 25.3 | 100.44 | 0.07 |
| 2021/6/17 21:10 | 0.723 | 25.3 | 100.44 | 0.07 |
| 2021/6/17 21:20 | 0.723 | 25.3 | 100.46 | 0.06 |
| 2021/6/17 21:30 | 0.727 | 25.2 | 100.47 | 0.07 |
| 2021/6/17 21:40 | 0.724 | 25.2 | 100.47 | 0.06 |
| 2021/6/17 21:50 | 0.727 | 25.2 | 100.47 | 0.06 |
| 2021/6/17 22:00 | 0.727 | 25.2 | 100.47 | 0.06 |
| 2021/6/17 22:10 | 0.727 | 25.2 | 100.49 | 0.06 |
| 2021/6/17 22:20 | 0.724 | 25.2 | 100.49 | 0.07 |
| 2021/6/17 22:30 | 0.724 | 25.2 | 100.49 | 0.06 |
| 2021/6/17 22:40 | 0.724 | 25.2 | 100.49 | 0.06 |
| 2021/6/17 22:50 | 0.724 | 25.2 | 100.49 | 0.06 |
| 2021/6/17 23:00 | 0.724 | 25.2 | 100.49 | 0.06 |
| 2021/6/17 23:10 | 0.724 | 25.2 | 100.49 | 0.06 |
| 2021/6/17 23:20 | 0.724 | 25.2 | 100.49 | 0.06 |
| 2021/6/17 23:30 | 0.728 | 25.1 | 100.49 | 0.06 |
| 2021/6/17 23:40 | 0.728 | 25.1 | 100.49 | 0.06 |
| 2021/6/17 23:50 | 0.728 | 25.1 | 100.49 | 0.06 |
| 2021/6/18 0:00  | 0.725 | 25.1 | 100.49 | 0.06 |
| 2021/6/18 0:10  | 0.725 | 25.1 | 100.47 | 0.06 |
| 2021/6/18 0:20  | 0.725 | 25.1 | 100.49 | 0.06 |
| 2021/6/18 0:30  | 0.725 | 25.1 | 100.49 | 0.06 |
| 2021/6/18 0:40  | 0.725 | 25.1 | 100.49 | 0.06 |
| 2021/6/18 0:50  | 0.730 | 25.0 | 100.49 | 0.06 |
| 2021/6/18 1:00  | 0.730 | 25.0 | 100.49 | 0.06 |
| 2021/6/18 1:10  | 0.730 | 25.0 | 100.49 | 0.06 |
| 2021/6/18 1:20  | 0.730 | 25.0 | 100.49 | 0.06 |
| 2021/6/18 1:30  | 0.730 | 25.0 | 100.49 | 0.06 |
| 2021/6/18 1:40  | 0.730 | 25.0 | 100.50 | 0.06 |
| 2021/6/18 1:50  | 0.730 | 25.0 | 100.50 | 0.06 |
| 2021/6/18 2:00  | 0.730 | 25.0 | 100.50 | 0.06 |
| 2021/6/18 2:10  | 0.730 | 25.0 | 100.50 | 0.06 |
| 2021/6/18 2:20  | 0.730 | 25.0 | 100.51 | 0.06 |
| 2021/6/18 2:30  | 0.730 | 25.0 | 100.51 | 0.06 |
| 2021/6/18 2:40  | 0.730 | 25.0 | 100.51 | 0.06 |
| 2021/6/18 2:50  | 0.734 | 24.9 | 100.53 | 0.06 |
| 2021/6/18 3:00  | 0.734 | 24.9 | 100.53 | 0.06 |
| 2021/6/18 3:10  | 0.734 | 24.9 | 100.53 | 0.06 |
| 2021/6/18 3:20  | 0.734 | 24.9 | 100.53 | 0.05 |
| 2021/6/18 3:30  | 0.734 | 24.9 | 100.53 | 0.05 |
| 2021/6/18 3:40  | 0.734 | 24.9 | 100.53 | 0.05 |
| 2021/6/18 3:50  | 0.734 | 24.9 | 100.54 | 0.05 |
| 2021/6/18 4:00  | 0.731 | 24.9 | 100.53 | 0.06 |
| 2021/6/18 4:10  | 0.731 | 24.9 | 100.54 | 0.06 |
| 2021/6/18 4:20  | 0.731 | 24.9 | 100.56 | 0.06 |
| 2021/6/18 4:30  | 0.735 | 24.8 | 100.56 | 0.06 |
| 2021/6/18 4:40  | 0.735 | 24.8 | 100.57 | 0.06 |
| 2021/6/18 4:50  | 0.735 | 24.8 | 100.59 | 0.06 |
| 2021/6/18 5:00  | 0.732 | 24.8 | 100.60 | 0.06 |
| 2021/6/18 5:10  | 0.732 | 24.8 | 100.60 | 0.06 |
| 2021/6/18 5:20  | 0.732 | 24.8 | 100.62 | 0.06 |
| 2021/6/18 5:30  | 0.732 | 24.8 | 100.62 | 0.06 |
| 2021/6/18 5:40  | 0.732 | 24.8 | 100.63 | 0.06 |
| 2021/6/18 5:50  | 0.732 | 24.8 | 100.63 | 0.06 |
| 2021/6/18 6:00  | 0.732 | 24.8 | 100.63 | 0.06 |

|                 |       |      |        |      |
|-----------------|-------|------|--------|------|
| 2021/6/18 6:10  | 0.732 | 24.8 | 100.63 | 0.06 |
| 2021/6/18 6:20  | 0.732 | 24.8 | 100.65 | 0.06 |
| 2021/6/18 6:30  | 0.729 | 24.8 | 100.65 | 0.06 |
| 2021/6/18 6:40  | 0.729 | 24.8 | 100.65 | 0.06 |
| 2021/6/18 6:50  | 0.729 | 24.8 | 100.66 | 0.06 |
| 2021/6/18 7:00  | 0.729 | 24.8 | 100.68 | 0.06 |
| 2021/6/18 7:10  | 0.729 | 24.8 | 100.69 | 0.06 |
| 2021/6/18 7:20  | 0.733 | 24.7 | 100.70 | 0.06 |
| 2021/6/18 7:30  | 0.733 | 24.7 | 100.72 | 0.06 |
| 2021/6/18 7:40  | 0.730 | 24.7 | 100.73 | 0.06 |
| 2021/6/18 7:50  | 0.730 | 24.7 | 100.73 | 0.06 |
| 2021/6/18 8:00  | 0.730 | 24.7 | 100.75 | 0.06 |
| 2021/6/18 8:10  | 0.730 | 24.7 | 100.75 | 0.06 |
| 2021/6/18 8:20  | 0.727 | 24.7 | 100.75 | 0.06 |
| 2021/6/18 8:30  | 0.727 | 24.7 | 100.76 | 0.06 |
| 2021/6/18 8:40  | 0.724 | 24.7 | 100.76 | 0.06 |
| 2021/6/18 8:50  | 0.724 | 24.7 | 100.76 | 0.06 |
| 2021/6/18 9:00  | 0.724 | 24.7 | 100.76 | 0.06 |
| 2021/6/18 9:10  | 0.720 | 24.7 | 100.78 | 0.06 |
| 2021/6/18 9:20  | 0.720 | 24.7 | 100.78 | 0.07 |
| 2021/6/18 9:30  | 0.720 | 24.7 | 100.78 | 0.06 |
| 2021/6/18 9:40  | 0.720 | 24.7 | 100.78 | 0.07 |
| 2021/6/18 9:50  | 0.717 | 24.7 | 100.78 | 0.06 |
| 2021/6/18 10:00 | 0.717 | 24.7 | 100.78 | 0.07 |
| 2021/6/18 10:10 | 0.717 | 24.7 | 100.78 | 0.06 |
| 2021/6/18 10:20 | 0.714 | 24.7 | 100.76 | 0.06 |
| 2021/6/18 10:30 | 0.714 | 24.7 | 100.78 | 0.06 |
| 2021/6/18 10:40 | 0.714 | 24.7 | 100.79 | 0.06 |
| 2021/6/18 10:50 | 0.706 | 24.8 | 100.79 | 0.06 |
| 2021/6/18 11:00 | 0.706 | 24.8 | 100.79 | 0.06 |
| 2021/6/18 11:10 | 0.703 | 24.8 | 100.79 | 0.06 |
| 2021/6/18 11:20 | 0.706 | 24.8 | 100.79 | 0.06 |
| 2021/6/18 11:30 | 0.706 | 24.8 | 100.79 | 0.06 |
| 2021/6/18 11:40 | 0.706 | 24.8 | 100.78 | 0.06 |
| 2021/6/18 11:50 | 0.703 | 24.8 | 100.78 | 0.06 |
| 2021/6/18 12:00 | 0.703 | 24.8 | 100.78 | 0.05 |
| 2021/6/18 12:10 | 0.703 | 24.8 | 100.76 | 0.06 |
| 2021/6/18 12:20 | 0.703 | 24.8 | 100.75 | 0.06 |
| 2021/6/18 12:30 | 0.703 | 24.8 | 100.76 | 0.05 |
| 2021/6/18 12:40 | 0.703 | 24.8 | 100.76 | 0.06 |
| 2021/6/18 12:50 | 0.703 | 24.8 | 100.76 | 0.05 |
| 2021/6/18 13:00 | 0.703 | 24.8 | 100.76 | 0.05 |
| 2021/6/18 13:10 | 0.694 | 24.8 | 100.75 | 0.05 |
| 2021/6/18 13:20 | 0.705 | 24.6 | 100.75 | 0.06 |
| 2021/6/18 13:30 | 0.708 | 24.6 | 100.75 | 0.06 |
| 2021/6/18 13:40 | 0.708 | 24.6 | 100.73 | 0.06 |
| 2021/6/18 13:50 | 0.707 | 24.7 | 100.75 | 0.05 |
| 2021/6/18 14:00 | 0.704 | 24.7 | 100.75 | 0.07 |
| 2021/6/18 14:10 | 0.703 | 24.8 | 100.75 | 0.06 |
| 2021/6/18 14:20 | 0.703 | 24.8 | 100.75 | 0.06 |
| 2021/6/18 14:30 | 0.706 | 24.8 | 100.75 | 0.06 |
| 2021/6/18 14:40 | 0.706 | 24.8 | 100.75 | 0.06 |
| 2021/6/18 14:50 | 0.706 | 24.8 | 100.75 | 0.06 |
| 2021/6/18 15:00 | 0.706 | 24.8 | 100.73 | 0.05 |
| 2021/6/18 15:10 | 0.710 | 24.8 | 100.73 | 0.05 |
| 2021/6/18 15:20 | 0.705 | 24.9 | 100.73 | 0.05 |

|                 |       |      |        |      |
|-----------------|-------|------|--------|------|
| 2021/6/18 15:30 | 0.705 | 24.9 | 100.72 | 0.05 |
| 2021/6/18 15:40 | 0.709 | 24.9 | 100.72 | 0.05 |
| 2021/6/18 15:50 | 0.705 | 24.9 | 100.72 | 0.05 |
| 2021/6/18 16:00 | 0.709 | 24.9 | 100.73 | 0.05 |
| 2021/6/18 16:10 | 0.712 | 24.9 | 100.73 | 0.06 |
| 2021/6/18 16:20 | 0.709 | 24.9 | 100.75 | 0.05 |
| 2021/6/18 16:30 | 0.712 | 24.9 | 100.75 | 0.05 |
| 2021/6/18 16:40 | 0.712 | 24.9 | 100.73 | 0.05 |
| 2021/6/18 16:50 | 0.712 | 24.9 | 100.73 | 0.06 |
| 2021/6/18 17:00 | 0.712 | 24.9 | 100.73 | 0.05 |
| 2021/6/18 17:10 | 0.712 | 24.9 | 100.73 | 0.05 |
| 2021/6/18 17:20 | 0.715 | 24.9 | 100.73 | 0.06 |
| 2021/6/18 17:30 | 0.712 | 24.9 | 100.73 | 0.05 |
| 2021/6/18 17:40 | 0.712 | 24.9 | 100.75 | 0.05 |
| 2021/6/18 17:50 | 0.716 | 24.8 | 100.76 | 0.05 |
| 2021/6/18 18:00 | 0.716 | 24.8 | 100.75 | 0.06 |
| 2021/6/18 18:10 | 0.716 | 24.8 | 100.76 | 0.06 |
| 2021/6/18 18:20 | 0.716 | 24.8 | 100.76 | 0.06 |
| 2021/6/18 18:30 | 0.716 | 24.8 | 100.78 | 0.06 |
| 2021/6/18 18:40 | 0.716 | 24.8 | 100.79 | 0.06 |
| 2021/6/18 18:50 | 0.719 | 24.8 | 100.79 | 0.06 |
| 2021/6/18 19:00 | 0.716 | 24.8 | 100.79 | 0.06 |
| 2021/6/18 19:10 | 0.716 | 24.8 | 100.81 | 0.06 |
| 2021/6/18 19:20 | 0.716 | 24.8 | 100.81 | 0.06 |
| 2021/6/18 19:30 | 0.716 | 24.8 | 100.82 | 0.06 |
| 2021/6/18 19:40 | 0.716 | 24.8 | 100.84 | 0.06 |
| 2021/6/18 19:50 | 0.720 | 24.7 | 100.85 | 0.06 |
| 2021/6/18 20:00 | 0.720 | 24.7 | 100.87 | 0.06 |
| 2021/6/18 20:10 | 0.720 | 24.7 | 100.88 | 0.06 |
| 2021/6/18 20:20 | 0.720 | 24.7 | 100.90 | 0.06 |
| 2021/6/18 20:30 | 0.720 | 24.7 | 100.90 | 0.06 |
| 2021/6/18 20:40 | 0.720 | 24.7 | 100.90 | 0.06 |
| 2021/6/18 20:50 | 0.717 | 24.7 | 100.90 | 0.06 |
| 2021/6/18 21:00 | 0.717 | 24.7 | 100.91 | 0.06 |
| 2021/6/18 21:10 | 0.717 | 24.7 | 100.92 | 0.06 |
| 2021/6/18 21:20 | 0.717 | 24.7 | 100.92 | 0.05 |
| 2021/6/18 21:30 | 0.717 | 24.7 | 100.92 | 0.05 |
| 2021/6/18 21:40 | 0.717 | 24.7 | 100.92 | 0.05 |
| 2021/6/18 21:50 | 0.717 | 24.7 | 100.92 | 0.06 |
| 2021/6/18 22:00 | 0.721 | 24.6 | 100.92 | 0.05 |
| 2021/6/18 22:10 | 0.718 | 24.6 | 100.94 | 0.05 |
| 2021/6/18 22:20 | 0.718 | 24.6 | 100.92 | 0.05 |
| 2021/6/18 22:30 | 0.718 | 24.6 | 100.92 | 0.05 |
| 2021/6/18 22:40 | 0.718 | 24.6 | 100.91 | 0.05 |
| 2021/6/18 22:50 | 0.718 | 24.6 | 100.91 | 0.05 |
| 2021/6/18 23:00 | 0.718 | 24.6 | 100.91 | 0.05 |
| 2021/6/18 23:10 | 0.718 | 24.6 | 100.92 | 0.05 |
| 2021/6/18 23:20 | 0.715 | 24.6 | 100.91 | 0.05 |
| 2021/6/18 23:30 | 0.715 | 24.6 | 100.91 | 0.05 |
| 2021/6/18 23:40 | 0.715 | 24.6 | 100.92 | 0.05 |
| 2021/6/18 23:50 | 0.715 | 24.6 | 100.92 | 0.05 |
| 2021/6/19 0:00  | 0.715 | 24.6 | 100.92 | 0.05 |
| 2021/6/19 0:10  | 0.719 | 24.5 | 100.92 | 0.05 |
| 2021/6/19 0:20  | 0.719 | 24.5 | 100.92 | 0.05 |
| 2021/6/19 0:30  | 0.719 | 24.5 | 100.91 | 0.04 |
| 2021/6/19 0:40  | 0.719 | 24.5 | 100.91 | 0.05 |

|                 |       |      |        |      |
|-----------------|-------|------|--------|------|
| 2021/6/19 0:50  | 0.719 | 24.5 | 100.91 | 0.05 |
| 2021/6/19 1:00  | 0.719 | 24.5 | 100.90 | 0.05 |
| 2021/6/19 1:10  | 0.716 | 24.5 | 100.91 | 0.04 |
| 2021/6/19 1:20  | 0.716 | 24.5 | 100.90 | 0.04 |
| 2021/6/19 1:30  | 0.716 | 24.5 | 100.90 | 0.04 |
| 2021/6/19 1:40  | 0.716 | 24.5 | 100.90 | 0.04 |
| 2021/6/19 1:50  | 0.716 | 24.5 | 100.88 | 0.04 |
| 2021/6/19 2:00  | 0.716 | 24.5 | 100.88 | 0.05 |
| 2021/6/19 2:10  | 0.716 | 24.5 | 100.87 | 0.04 |
| 2021/6/19 2:20  | 0.716 | 24.5 | 100.87 | 0.04 |
| 2021/6/19 2:30  | 0.716 | 24.5 | 100.87 | 0.04 |
| 2021/6/19 2:40  | 0.720 | 24.4 | 100.87 | 0.04 |
| 2021/6/19 2:50  | 0.720 | 24.4 | 100.85 | 0.04 |
| 2021/6/19 3:00  | 0.720 | 24.4 | 100.84 | 0.04 |
| 2021/6/19 3:10  | 0.720 | 24.4 | 100.85 | 0.04 |
| 2021/6/19 3:20  | 0.720 | 24.4 | 100.85 | 0.04 |
| 2021/6/19 3:30  | 0.720 | 24.4 | 100.85 | 0.04 |
| 2021/6/19 3:40  | 0.717 | 24.4 | 100.87 | 0.04 |
| 2021/6/19 3:50  | 0.717 | 24.4 | 100.87 | 0.04 |
| 2021/6/19 4:00  | 0.717 | 24.4 | 100.87 | 0.04 |
| 2021/6/19 4:10  | 0.717 | 24.4 | 100.87 | 0.04 |
| 2021/6/19 4:20  | 0.717 | 24.4 | 100.87 | 0.03 |
| 2021/6/19 4:30  | 0.717 | 24.4 | 100.87 | 0.04 |
| 2021/6/19 4:40  | 0.721 | 24.3 | 100.88 | 0.03 |
| 2021/6/19 4:50  | 0.718 | 24.3 | 100.88 | 0.04 |
| 2021/6/19 5:00  | 0.718 | 24.3 | 100.87 | 0.04 |
| 2021/6/19 5:10  | 0.718 | 24.3 | 100.87 | 0.04 |
| 2021/6/19 5:20  | 0.718 | 24.3 | 100.87 | 0.04 |
| 2021/6/19 5:30  | 0.715 | 24.3 | 100.87 | 0.04 |
| 2021/6/19 5:40  | 0.715 | 24.3 | 100.87 | 0.03 |
| 2021/6/19 5:50  | 0.715 | 24.3 | 100.87 | 0.04 |
| 2021/6/19 6:00  | 0.715 | 24.3 | 100.88 | 0.04 |
| 2021/6/19 6:10  | 0.715 | 24.3 | 100.88 | 0.04 |
| 2021/6/19 6:20  | 0.715 | 24.3 | 100.88 | 0.04 |
| 2021/6/19 6:30  | 0.716 | 24.2 | 100.90 | 0.04 |
| 2021/6/19 6:40  | 0.716 | 24.2 | 100.90 | 0.03 |
| 2021/6/19 6:50  | 0.716 | 24.2 | 100.90 | 0.04 |
| 2021/6/19 7:00  | 0.716 | 24.2 | 100.90 | 0.03 |
| 2021/6/19 7:10  | 0.719 | 24.2 | 100.91 | 0.04 |
| 2021/6/19 7:20  | 0.719 | 24.2 | 100.91 | 0.03 |
| 2021/6/19 7:30  | 0.719 | 24.2 | 100.92 | 0.03 |
| 2021/6/19 7:40  | 0.719 | 24.2 | 100.92 | 0.04 |
| 2021/6/19 7:50  | 0.715 | 24.3 | 100.92 | 0.04 |
| 2021/6/19 8:00  | 0.715 | 24.3 | 100.92 | 0.03 |
| 2021/6/19 8:10  | 0.715 | 24.3 | 100.92 | 0.03 |
| 2021/6/19 8:20  | 0.718 | 24.3 | 100.92 | 0.04 |
| 2021/6/19 8:30  | 0.718 | 24.3 | 100.92 | 0.04 |
| 2021/6/19 8:40  | 0.718 | 24.3 | 100.92 | 0.04 |
| 2021/6/19 8:50  | 0.718 | 24.3 | 100.92 | 0.03 |
| 2021/6/19 9:00  | 0.718 | 24.3 | 100.92 | 0.03 |
| 2021/6/19 9:10  | 0.718 | 24.3 | 100.92 | 0.03 |
| 2021/6/19 9:20  | 0.718 | 24.3 | 100.92 | 0.04 |
| 2021/6/19 9:30  | 0.718 | 24.3 | 100.92 | 0.04 |
| 2021/6/19 9:40  | 0.718 | 24.3 | 100.91 | 0.04 |
| 2021/6/19 9:50  | 0.714 | 24.4 | 100.91 | 0.04 |
| 2021/6/19 10:00 | 0.714 | 24.4 | 100.91 | 0.04 |

|                 |       |      |        |      |
|-----------------|-------|------|--------|------|
| 2021/6/19 10:10 | 0.714 | 24.4 | 100.91 | 0.05 |
| 2021/6/19 10:20 | 0.714 | 24.4 | 100.90 | 0.05 |
| 2021/6/19 10:30 | 0.714 | 24.4 | 100.88 | 0.05 |
| 2021/6/19 10:40 | 0.714 | 24.4 | 100.90 | 0.05 |
| 2021/6/19 10:50 | 0.714 | 24.4 | 100.90 | 0.05 |
| 2021/6/19 11:00 | 0.714 | 24.4 | 100.90 | 0.04 |
| 2021/6/19 11:10 | 0.714 | 24.4 | 100.91 | 0.05 |
| 2021/6/19 11:20 | 0.706 | 24.5 | 100.91 | 0.04 |
| 2021/6/19 11:30 | 0.706 | 24.5 | 100.92 | 0.04 |
| 2021/6/19 11:40 | 0.706 | 24.5 | 100.94 | 0.04 |
| 2021/6/19 11:50 | 0.706 | 24.5 | 100.94 | 0.04 |
| 2021/6/19 12:00 | 0.709 | 24.5 | 100.94 | 0.05 |
| 2021/6/19 12:10 | 0.709 | 24.5 | 100.94 | 0.04 |
| 2021/6/19 12:20 | 0.706 | 24.5 | 100.94 | 0.05 |
| 2021/6/19 12:30 | 0.706 | 24.5 | 100.92 | 0.04 |
| 2021/6/19 12:40 | 0.703 | 24.5 | 100.92 | 0.05 |
| 2021/6/19 12:50 | 0.703 | 24.5 | 100.94 | 0.05 |
| 2021/6/19 13:00 | 0.703 | 24.5 | 100.94 | 0.05 |
| 2021/6/19 13:10 | 0.703 | 24.5 | 100.94 | 0.05 |
| 2021/6/19 13:20 | 0.700 | 24.5 | 100.92 | 0.05 |
| 2021/6/19 13:30 | 0.700 | 24.5 | 100.92 | 0.05 |
| 2021/6/19 13:40 | 0.696 | 24.5 | 100.94 | 0.04 |
| 2021/6/19 13:50 | 0.696 | 24.5 | 100.92 | 0.05 |
| 2021/6/19 14:00 | 0.693 | 24.5 | 100.94 | 0.04 |
| 2021/6/19 14:10 | 0.693 | 24.5 | 100.95 | 0.05 |
| 2021/6/19 14:20 | 0.693 | 24.5 | 100.94 | 0.05 |
| 2021/6/19 14:30 | 0.693 | 24.5 | 100.94 | 0.04 |
| 2021/6/19 14:40 | 0.693 | 24.5 | 100.94 | 0.05 |
| 2021/6/19 14:50 | 0.693 | 24.5 | 100.94 | 0.04 |
| 2021/6/19 15:00 | 0.690 | 24.5 | 100.92 | 0.04 |
| 2021/6/19 15:10 | 0.690 | 24.5 | 100.92 | 0.05 |
| 2021/6/19 15:20 | 0.690 | 24.5 | 100.92 | 0.04 |
| 2021/6/19 15:30 | 0.687 | 24.5 | 100.92 | 0.04 |
| 2021/6/19 15:40 | 0.687 | 24.5 | 100.92 | 0.04 |
| 2021/6/19 15:50 | 0.687 | 24.5 | 100.94 | 0.04 |
| 2021/6/19 16:00 | 0.683 | 24.5 | 100.94 | 0.04 |
| 2021/6/19 16:10 | 0.683 | 24.5 | 100.94 | 0.05 |
| 2021/6/19 16:20 | 0.683 | 24.5 | 100.92 | 0.04 |
| 2021/6/19 16:30 | 0.680 | 24.5 | 100.91 | 0.04 |
| 2021/6/19 16:40 | 0.680 | 24.5 | 100.91 | 0.04 |
| 2021/6/19 16:50 | 0.680 | 24.5 | 100.90 | 0.04 |
| 2021/6/19 17:00 | 0.676 | 24.6 | 100.90 | 0.05 |
| 2021/6/19 17:10 | 0.676 | 24.6 | 100.90 | 0.05 |
| 2021/6/19 17:20 | 0.676 | 24.6 | 100.90 | 0.05 |
| 2021/6/19 17:30 | 0.670 | 24.6 | 100.91 | 0.05 |
| 2021/6/19 17:40 | 0.669 | 24.7 | 100.92 | 0.05 |
| 2021/6/19 17:50 | 0.672 | 24.7 | 100.92 | 0.05 |
| 2021/6/19 18:00 | 0.672 | 24.7 | 100.92 | 0.05 |
| 2021/6/19 18:10 | 0.672 | 24.7 | 100.94 | 0.05 |
| 2021/6/19 18:20 | 0.676 | 24.6 | 100.95 | 0.05 |
| 2021/6/19 18:30 | 0.676 | 24.6 | 100.95 | 0.04 |
| 2021/6/19 18:40 | 0.676 | 24.6 | 100.97 | 0.04 |
| 2021/6/19 18:50 | 0.676 | 24.6 | 100.98 | 0.05 |
| 2021/6/19 19:00 | 0.676 | 24.6 | 100.98 | 0.04 |
| 2021/6/19 19:10 | 0.677 | 24.5 | 101.00 | 0.03 |
| 2021/6/19 19:20 | 0.677 | 24.5 | 101.00 | 0.04 |

|                 |       |      |        |      |
|-----------------|-------|------|--------|------|
| 2021/6/19 19:30 | 0.677 | 24.5 | 101.00 | 0.04 |
| 2021/6/19 19:40 | 0.677 | 24.5 | 101.01 | 0.03 |
| 2021/6/19 19:50 | 0.677 | 24.5 | 101.01 | 0.04 |
| 2021/6/19 20:00 | 0.677 | 24.5 | 101.01 | 0.03 |
| 2021/6/19 20:10 | 0.677 | 24.5 | 101.01 | 0.03 |
| 2021/6/19 20:20 | 0.677 | 24.5 | 101.01 | 0.03 |
| 2021/6/19 20:30 | 0.681 | 24.4 | 101.01 | 0.03 |
| 2021/6/19 20:40 | 0.681 | 24.4 | 101.03 | 0.03 |
| 2021/6/19 20:50 | 0.681 | 24.4 | 101.03 | 0.03 |
| 2021/6/19 21:00 | 0.681 | 24.4 | 101.04 | 0.03 |
| 2021/6/19 21:10 | 0.681 | 24.4 | 101.06 | 0.03 |
| 2021/6/19 21:20 | 0.681 | 24.4 | 101.06 | 0.03 |
| 2021/6/19 21:30 | 0.681 | 24.4 | 101.07 | 0.03 |
| 2021/6/19 21:40 | 0.681 | 24.4 | 101.07 | 0.03 |
| 2021/6/19 21:50 | 0.681 | 24.4 | 101.10 | 0.03 |
| 2021/6/19 22:00 | 0.681 | 24.4 | 101.09 | 0.03 |
| 2021/6/19 22:10 | 0.681 | 24.4 | 101.09 | 0.03 |
| 2021/6/19 22:20 | 0.681 | 24.4 | 101.09 | 0.03 |
| 2021/6/19 22:30 | 0.681 | 24.4 | 101.09 | 0.03 |
| 2021/6/19 22:40 | 0.685 | 24.3 | 101.09 | 0.03 |
| 2021/6/19 22:50 | 0.685 | 24.3 | 101.09 | 0.03 |
| 2021/6/19 23:00 | 0.685 | 24.3 | 101.09 | 0.02 |
| 2021/6/19 23:10 | 0.685 | 24.3 | 101.09 | 0.03 |
| 2021/6/19 23:20 | 0.685 | 24.3 | 101.10 | 0.02 |
| 2021/6/19 23:30 | 0.685 | 24.3 | 101.12 | 0.03 |
| 2021/6/19 23:40 | 0.685 | 24.3 | 101.10 | 0.03 |
| 2021/6/19 23:50 | 0.688 | 24.3 | 101.12 | 0.03 |
| 2021/6/20 0:00  | 0.688 | 24.3 | 101.12 | 0.03 |
| 2021/6/20 0:10  | 0.688 | 24.3 | 101.12 | 0.02 |
| 2021/6/20 0:20  | 0.688 | 24.3 | 101.10 | 0.03 |
| 2021/6/20 0:30  | 0.696 | 24.2 | 101.09 | 0.03 |
| 2021/6/20 0:40  | 0.696 | 24.2 | 101.09 | 0.03 |
| 2021/6/20 0:50  | 0.696 | 24.2 | 101.07 | 0.03 |
| 2021/6/20 1:00  | 0.696 | 24.2 | 101.04 | 0.03 |
| 2021/6/20 1:10  | 0.696 | 24.2 | 101.06 | 0.03 |
| 2021/6/20 1:20  | 0.692 | 24.2 | 101.04 | 0.03 |
| 2021/6/20 1:30  | 0.696 | 24.2 | 101.03 | 0.03 |
| 2021/6/20 1:40  | 0.692 | 24.2 | 101.03 | 0.03 |
| 2021/6/20 1:50  | 0.692 | 24.2 | 101.03 | 0.03 |
| 2021/6/20 2:00  | 0.692 | 24.2 | 101.01 | 0.03 |
| 2021/6/20 2:10  | 0.692 | 24.2 | 101.00 | 0.03 |
| 2021/6/20 2:20  | 0.697 | 24.1 | 101.00 | 0.03 |
| 2021/6/20 2:30  | 0.697 | 24.1 | 101.00 | 0.03 |
| 2021/6/20 2:40  | 0.697 | 24.1 | 100.98 | 0.03 |
| 2021/6/20 2:50  | 0.697 | 24.1 | 100.98 | 0.03 |
| 2021/6/20 3:00  | 0.697 | 24.1 | 100.98 | 0.03 |
| 2021/6/20 3:10  | 0.697 | 24.1 | 101.00 | 0.03 |
| 2021/6/20 3:20  | 0.697 | 24.1 | 101.00 | 0.03 |
| 2021/6/20 3:30  | 0.693 | 24.1 | 100.98 | 0.03 |
| 2021/6/20 3:40  | 0.697 | 24.1 | 100.98 | 0.03 |
| 2021/6/20 3:50  | 0.693 | 24.1 | 100.98 | 0.04 |
| 2021/6/20 4:00  | 0.693 | 24.1 | 101.00 | 0.04 |
| 2021/6/20 4:10  | 0.698 | 24.0 | 101.00 | 0.03 |
| 2021/6/20 4:20  | 0.698 | 24.0 | 101.00 | 0.03 |
| 2021/6/20 4:30  | 0.698 | 24.0 | 101.01 | 0.03 |
| 2021/6/20 4:40  | 0.698 | 24.0 | 101.03 | 0.03 |

|                 |       |      |        |      |
|-----------------|-------|------|--------|------|
| 2021/6/20 4:50  | 0.698 | 24.0 | 101.01 | 0.03 |
| 2021/6/20 5:00  | 0.698 | 24.0 | 101.01 | 0.03 |
| 2021/6/20 5:10  | 0.694 | 24.0 | 101.04 | 0.03 |
| 2021/6/20 5:20  | 0.694 | 24.0 | 101.04 | 0.03 |
| 2021/6/20 5:30  | 0.694 | 24.0 | 101.03 | 0.03 |
| 2021/6/20 5:40  | 0.694 | 24.0 | 101.04 | 0.03 |
| 2021/6/20 5:50  | 0.694 | 24.0 | 101.06 | 0.03 |
| 2021/6/20 6:00  | 0.698 | 23.9 | 101.04 | 0.04 |
| 2021/6/20 6:10  | 0.698 | 23.9 | 101.04 | 0.04 |
| 2021/6/20 6:20  | 0.698 | 23.9 | 101.06 | 0.03 |
| 2021/6/20 6:30  | 0.695 | 23.9 | 101.07 | 0.04 |
| 2021/6/20 6:40  | 0.695 | 23.9 | 101.07 | 0.04 |
| 2021/6/20 6:50  | 0.695 | 23.9 | 101.07 | 0.03 |
| 2021/6/20 7:00  | 0.695 | 23.9 | 101.07 | 0.03 |
| 2021/6/20 7:10  | 0.695 | 23.9 | 101.09 | 0.04 |
| 2021/6/20 7:20  | 0.695 | 23.9 | 101.09 | 0.04 |
| 2021/6/20 7:30  | 0.695 | 23.9 | 101.10 | 0.04 |
| 2021/6/20 7:40  | 0.695 | 23.9 | 101.12 | 0.03 |
| 2021/6/20 7:50  | 0.695 | 23.9 | 101.12 | 0.04 |
| 2021/6/20 8:00  | 0.695 | 23.9 | 101.12 | 0.03 |
| 2021/6/20 8:10  | 0.698 | 23.9 | 101.12 | 0.03 |
| 2021/6/20 8:20  | 0.698 | 23.9 | 101.12 | 0.03 |
| 2021/6/20 8:30  | 0.694 | 24.0 | 101.12 | 0.03 |
| 2021/6/20 8:40  | 0.694 | 24.0 | 101.12 | 0.03 |
| 2021/6/20 8:50  | 0.694 | 24.0 | 101.10 | 0.04 |
| 2021/6/20 9:00  | 0.694 | 24.0 | 101.10 | 0.04 |
| 2021/6/20 9:10  | 0.694 | 24.0 | 101.10 | 0.04 |
| 2021/6/20 9:20  | 0.698 | 24.0 | 101.10 | 0.03 |
| 2021/6/20 9:30  | 0.698 | 24.0 | 101.09 | 0.03 |
| 2021/6/20 9:40  | 0.693 | 24.1 | 101.10 | 0.03 |
| 2021/6/20 9:50  | 0.693 | 24.1 | 101.10 | 0.04 |
| 2021/6/20 10:00 | 0.697 | 24.1 | 101.09 | 0.04 |
| 2021/6/20 10:10 | 0.697 | 24.1 | 101.09 | 0.03 |
| 2021/6/20 10:20 | 0.697 | 24.1 | 101.09 | 0.03 |
| 2021/6/20 10:30 | 0.700 | 24.1 | 101.09 | 0.03 |
| 2021/6/20 10:40 | 0.696 | 24.2 | 101.09 | 0.03 |
| 2021/6/20 10:50 | 0.696 | 24.2 | 101.09 | 0.03 |
| 2021/6/20 11:00 | 0.696 | 24.2 | 101.09 | 0.03 |
| 2021/6/20 11:10 | 0.699 | 24.2 | 101.07 | 0.03 |
| 2021/6/20 11:20 | 0.699 | 24.2 | 101.06 | 0.03 |
| 2021/6/20 11:30 | 0.699 | 24.2 | 101.04 | 0.03 |
| 2021/6/20 11:40 | 0.695 | 24.3 | 101.03 | 0.03 |
| 2021/6/20 11:50 | 0.698 | 24.3 | 101.03 | 0.03 |
| 2021/6/20 12:00 | 0.698 | 24.3 | 101.01 | 0.03 |
| 2021/6/20 12:10 | 0.698 | 24.3 | 101.01 | 0.03 |
| 2021/6/20 12:20 | 0.702 | 24.3 | 101.00 | 0.03 |
| 2021/6/20 12:30 | 0.702 | 24.3 | 100.98 | 0.03 |
| 2021/6/20 12:40 | 0.697 | 24.4 | 100.98 | 0.04 |
| 2021/6/20 12:50 | 0.697 | 24.4 | 100.98 | 0.03 |
| 2021/6/20 13:00 | 0.697 | 24.4 | 100.98 | 0.04 |
| 2021/6/20 13:10 | 0.701 | 24.4 | 101.00 | 0.04 |
| 2021/6/20 13:20 | 0.701 | 24.4 | 100.98 | 0.03 |
| 2021/6/20 13:30 | 0.701 | 24.4 | 100.98 | 0.04 |
| 2021/6/20 13:40 | 0.700 | 24.5 | 100.98 | 0.04 |
| 2021/6/20 13:50 | 0.700 | 24.5 | 100.97 | 0.04 |
| 2021/6/20 14:00 | 0.700 | 24.5 | 100.95 | 0.04 |

|                 |       |      |        |      |
|-----------------|-------|------|--------|------|
| 2021/6/20 14:10 | 0.703 | 24.5 | 100.95 | 0.04 |
| 2021/6/20 14:20 | 0.703 | 24.5 | 100.94 | 0.04 |
| 2021/6/20 14:30 | 0.703 | 24.5 | 100.92 | 0.04 |
| 2021/6/20 14:40 | 0.706 | 24.5 | 100.92 | 0.04 |
| 2021/6/20 14:50 | 0.706 | 24.5 | 100.92 | 0.04 |
| 2021/6/20 15:00 | 0.706 | 24.5 | 100.92 | 0.04 |
| 2021/6/20 15:10 | 0.706 | 24.5 | 100.94 | 0.04 |
| 2021/6/20 15:20 | 0.709 | 24.5 | 100.94 | 0.05 |
| 2021/6/20 15:30 | 0.709 | 24.5 | 100.95 | 0.04 |
| 2021/6/20 15:40 | 0.709 | 24.5 | 100.94 | 0.04 |
| 2021/6/20 15:50 | 0.709 | 24.5 | 100.95 | 0.04 |
| 2021/6/20 16:00 | 0.713 | 24.5 | 100.95 | 0.05 |
| 2021/6/20 16:10 | 0.713 | 24.5 | 100.95 | 0.05 |
| 2021/6/20 16:20 | 0.713 | 24.5 | 100.95 | 0.05 |
| 2021/6/20 16:30 | 0.713 | 24.5 | 100.95 | 0.05 |
| 2021/6/20 16:40 | 0.713 | 24.5 | 100.94 | 0.04 |
| 2021/6/20 16:50 | 0.713 | 24.5 | 100.92 | 0.04 |
| 2021/6/20 17:00 | 0.713 | 24.5 | 100.91 | 0.05 |
| 2021/6/20 17:10 | 0.713 | 24.5 | 100.92 | 0.04 |
| 2021/6/20 17:20 | 0.716 | 24.5 | 100.92 | 0.05 |
| 2021/6/20 17:30 | 0.716 | 24.5 | 100.92 | 0.05 |
| 2021/6/20 17:40 | 0.716 | 24.5 | 100.92 | 0.04 |
| 2021/6/20 17:50 | 0.716 | 24.5 | 100.94 | 0.04 |
| 2021/6/20 18:00 | 0.716 | 24.5 | 100.94 | 0.05 |
| 2021/6/20 18:10 | 0.719 | 24.5 | 100.95 | 0.05 |
| 2021/6/20 18:20 | 0.719 | 24.5 | 100.94 | 0.05 |
| 2021/6/20 18:30 | 0.719 | 24.5 | 100.97 | 0.05 |
| 2021/6/20 18:40 | 0.719 | 24.5 | 100.95 | 0.05 |
| 2021/6/20 18:50 | 0.722 | 24.5 | 100.95 | 0.04 |
| 2021/6/20 19:00 | 0.722 | 24.5 | 100.95 | 0.05 |
| 2021/6/20 19:10 | 0.722 | 24.5 | 100.95 | 0.04 |
| 2021/6/20 19:20 | 0.722 | 24.5 | 100.97 | 0.04 |
| 2021/6/20 19:30 | 0.722 | 24.5 | 100.98 | 0.04 |
| 2021/6/20 19:40 | 0.722 | 24.5 | 100.98 | 0.04 |
| 2021/6/20 19:50 | 0.722 | 24.5 | 101.00 | 0.05 |
| 2021/6/20 20:00 | 0.722 | 24.5 | 101.00 | 0.04 |
| 2021/6/20 20:10 | 0.726 | 24.5 | 101.00 | 0.04 |
| 2021/6/20 20:20 | 0.726 | 24.5 | 101.01 | 0.05 |
| 2021/6/20 20:30 | 0.726 | 24.5 | 101.01 | 0.04 |
| 2021/6/20 20:40 | 0.726 | 24.5 | 101.01 | 0.05 |
| 2021/6/20 20:50 | 0.726 | 24.5 | 101.01 | 0.05 |
| 2021/6/20 21:00 | 0.730 | 24.4 | 101.03 | 0.04 |
| 2021/6/20 21:10 | 0.730 | 24.4 | 101.03 | 0.04 |
| 2021/6/20 21:20 | 0.730 | 24.4 | 101.04 | 0.04 |
| 2021/6/20 21:30 | 0.730 | 24.4 | 101.06 | 0.04 |
| 2021/6/20 21:40 | 0.730 | 24.4 | 101.06 | 0.05 |
| 2021/6/20 21:50 | 0.730 | 24.4 | 101.06 | 0.05 |
| 2021/6/20 22:00 | 0.730 | 24.4 | 101.06 | 0.04 |
| 2021/6/20 22:10 | 0.730 | 24.4 | 101.04 | 0.04 |
| 2021/6/20 22:20 | 0.730 | 24.4 | 101.04 | 0.04 |
| 2021/6/20 22:30 | 0.730 | 24.4 | 101.06 | 0.05 |
| 2021/6/20 22:40 | 0.730 | 24.4 | 101.06 | 0.04 |
| 2021/6/20 22:50 | 0.733 | 24.4 | 101.06 | 0.04 |
| 2021/6/20 23:00 | 0.733 | 24.4 | 101.04 | 0.04 |
| 2021/6/20 23:10 | 0.733 | 24.4 | 101.03 | 0.04 |
| 2021/6/20 23:20 | 0.733 | 24.4 | 101.03 | 0.04 |

|                 |       |      |        |      |
|-----------------|-------|------|--------|------|
| 2021/6/20 23:30 | 0.733 | 24.4 | 101.03 | 0.04 |
| 2021/6/20 23:40 | 0.733 | 24.4 | 101.03 | 0.04 |
| 2021/6/20 23:50 | 0.733 | 24.4 | 101.03 | 0.04 |
| 2021/6/21 0:00  | 0.733 | 24.4 | 101.04 | 0.03 |
| 2021/6/21 0:10  | 0.733 | 24.4 | 101.04 | 0.04 |
| 2021/6/21 0:20  | 0.733 | 24.4 | 101.03 | 0.04 |
| 2021/6/21 0:30  | 0.733 | 24.4 | 101.04 | 0.04 |
| 2021/6/21 0:40  | 0.738 | 24.3 | 101.03 | 0.04 |
| 2021/6/21 0:50  | 0.738 | 24.3 | 101.03 | 0.03 |
| 2021/6/21 1:00  | 0.738 | 24.3 | 101.03 | 0.04 |
| 2021/6/21 1:10  | 0.738 | 24.3 | 101.03 | 0.04 |
| 2021/6/21 1:20  | 0.738 | 24.3 | 101.01 | 0.03 |
| 2021/6/21 1:30  | 0.738 | 24.3 | 101.00 | 0.04 |
| 2021/6/21 1:40  | 0.738 | 24.3 | 100.98 | 0.04 |
| 2021/6/21 1:50  | 0.738 | 24.3 | 100.98 | 0.04 |
| 2021/6/21 2:00  | 0.738 | 24.3 | 100.98 | 0.04 |
| 2021/6/21 2:10  | 0.738 | 24.3 | 100.98 | 0.03 |
| 2021/6/21 2:20  | 0.738 | 24.3 | 100.98 | 0.03 |
| 2021/6/21 2:30  | 0.738 | 24.3 | 100.97 | 0.04 |
| 2021/6/21 2:40  | 0.738 | 24.3 | 100.97 | 0.04 |
| 2021/6/21 2:50  | 0.738 | 24.3 | 100.95 | 0.03 |
| 2021/6/21 3:00  | 0.738 | 24.3 | 100.95 | 0.03 |
| 2021/6/21 3:10  | 0.738 | 24.3 | 100.95 | 0.03 |
| 2021/6/21 3:20  | 0.738 | 24.3 | 100.97 | 0.04 |
| 2021/6/21 3:30  | 0.738 | 24.3 | 100.95 | 0.04 |
| 2021/6/21 3:40  | 0.742 | 24.2 | 100.95 | 0.04 |
| 2021/6/21 3:50  | 0.742 | 24.2 | 100.95 | 0.04 |
| 2021/6/21 4:00  | 0.742 | 24.2 | 100.97 | 0.04 |
| 2021/6/21 4:10  | 0.742 | 24.2 | 100.97 | 0.04 |
| 2021/6/21 4:20  | 0.739 | 24.2 | 100.97 | 0.04 |
| 2021/6/21 4:30  | 0.739 | 24.2 | 100.97 | 0.04 |
| 2021/6/21 4:40  | 0.739 | 24.2 | 100.97 | 0.03 |
| 2021/6/21 4:50  | 0.739 | 24.2 | 100.97 | 0.03 |
| 2021/6/21 5:00  | 0.739 | 24.2 | 100.97 | 0.03 |
| 2021/6/21 5:10  | 0.736 | 24.2 | 100.97 | 0.03 |
| 2021/6/21 5:20  | 0.736 | 24.2 | 100.97 | 0.03 |
| 2021/6/21 5:30  | 0.736 | 24.2 | 100.97 | 0.03 |
| 2021/6/21 5:40  | 0.736 | 24.2 | 100.97 | 0.03 |
| 2021/6/21 5:50  | 0.736 | 24.2 | 100.97 | 0.03 |
| 2021/6/21 6:00  | 0.736 | 24.2 | 100.98 | 0.03 |
| 2021/6/21 6:10  | 0.737 | 24.1 | 101.00 | 0.03 |
| 2021/6/21 6:20  | 0.737 | 24.1 | 101.01 | 0.03 |
| 2021/6/21 6:30  | 0.737 | 24.1 | 101.01 | 0.04 |
| 2021/6/21 6:40  | 0.737 | 24.1 | 101.04 | 0.04 |
| 2021/6/21 6:50  | 0.737 | 24.1 | 101.04 | 0.04 |
| 2021/6/21 7:00  | 0.737 | 24.1 | 101.06 | 0.04 |
| 2021/6/21 7:10  | 0.737 | 24.1 | 101.07 | 0.04 |
| 2021/6/21 7:20  | 0.737 | 24.1 | 101.07 | 0.04 |
| 2021/6/21 7:30  | 0.737 | 24.1 | 101.07 | 0.04 |
| 2021/6/21 7:40  | 0.737 | 24.1 | 101.07 | 0.03 |
| 2021/6/21 7:50  | 0.737 | 24.1 | 101.06 | 0.04 |
| 2021/6/21 8:00  | 0.737 | 24.1 | 101.06 | 0.04 |
| 2021/6/21 8:10  | 0.737 | 24.1 | 101.07 | 0.04 |
| 2021/6/21 8:20  | 0.737 | 24.1 | 101.07 | 0.04 |
| 2021/6/21 8:30  | 0.732 | 24.2 | 101.07 | 0.04 |
| 2021/6/21 8:40  | 0.732 | 24.2 | 101.07 | 0.04 |

|                 |       |      |        |      |
|-----------------|-------|------|--------|------|
| 2021/6/21 8:50  | 0.736 | 24.2 | 101.06 | 0.04 |
| 2021/6/21 9:00  | 0.736 | 24.2 | 101.04 | 0.05 |
| 2021/6/21 9:10  | 0.736 | 24.2 | 101.03 | 0.05 |
| 2021/6/21 9:20  | 0.736 | 24.2 | 101.03 | 0.05 |
| 2021/6/21 9:30  | 0.739 | 24.2 | 101.04 | 0.05 |
| 2021/6/21 9:40  | 0.739 | 24.2 | 101.04 | 0.04 |
| 2021/6/21 9:50  | 0.739 | 24.2 | 101.03 | 0.05 |
| 2021/6/21 10:00 | 0.734 | 24.3 | 101.03 | 0.04 |
| 2021/6/21 10:10 | 0.738 | 24.3 | 101.04 | 0.04 |
| 2021/6/21 10:20 | 0.738 | 24.3 | 101.04 | 0.05 |
| 2021/6/21 10:30 | 0.738 | 24.3 | 101.04 | 0.05 |
| 2021/6/21 10:40 | 0.741 | 24.3 | 101.03 | 0.05 |
| 2021/6/21 10:50 | 0.737 | 24.4 | 101.01 | 0.05 |
| 2021/6/21 11:00 | 0.740 | 24.4 | 101.01 | 0.05 |
| 2021/6/21 11:10 | 0.740 | 24.4 | 101.01 | 0.05 |
| 2021/6/21 11:20 | 0.740 | 24.4 | 101.00 | 0.06 |
| 2021/6/21 11:30 | 0.743 | 24.4 | 101.00 | 0.05 |
| 2021/6/21 11:40 | 0.743 | 24.4 | 101.00 | 0.06 |
| 2021/6/21 11:50 | 0.739 | 24.5 | 100.98 | 0.05 |
| 2021/6/21 12:00 | 0.739 | 24.5 | 100.98 | 0.05 |
| 2021/6/21 12:10 | 0.742 | 24.5 | 100.97 | 0.06 |
| 2021/6/21 12:20 | 0.742 | 24.5 | 100.97 | 0.05 |
| 2021/6/21 12:30 | 0.742 | 24.5 | 100.94 | 0.06 |
| 2021/6/21 12:40 | 0.742 | 24.5 | 100.94 | 0.06 |
| 2021/6/21 12:50 | 0.745 | 24.5 | 100.94 | 0.06 |
| 2021/6/21 13:00 | 0.741 | 24.6 | 100.94 | 0.06 |
| 2021/6/21 13:10 | 0.741 | 24.6 | 100.94 | 0.06 |
| 2021/6/21 13:20 | 0.741 | 24.6 | 100.92 | 0.06 |
| 2021/6/21 13:30 | 0.741 | 24.6 | 100.91 | 0.06 |
| 2021/6/21 13:40 | 0.744 | 24.6 | 100.91 | 0.06 |
| 2021/6/21 13:50 | 0.741 | 24.6 | 100.90 | 0.06 |
| 2021/6/21 14:00 | 0.744 | 24.6 | 100.88 | 0.06 |
| 2021/6/21 14:10 | 0.744 | 24.6 | 100.90 | 0.06 |
| 2021/6/21 14:20 | 0.744 | 24.6 | 100.91 | 0.06 |
| 2021/6/21 14:30 | 0.747 | 24.6 | 100.91 | 0.06 |
| 2021/6/21 14:40 | 0.747 | 24.6 | 100.91 | 0.07 |
| 2021/6/21 14:50 | 0.747 | 24.6 | 100.90 | 0.06 |
| 2021/6/21 15:00 | 0.751 | 24.6 | 100.90 | 0.06 |
| 2021/6/21 15:10 | 0.751 | 24.6 | 100.90 | 0.06 |
| 2021/6/21 15:20 | 0.754 | 24.6 | 100.90 | 0.06 |
| 2021/6/21 15:30 | 0.754 | 24.6 | 100.90 | 0.06 |
| 2021/6/21 15:40 | 0.757 | 24.6 | 100.90 | 0.06 |
| 2021/6/21 15:50 | 0.757 | 24.6 | 100.90 | 0.06 |
| 2021/6/21 16:00 | 0.757 | 24.6 | 100.91 | 0.06 |
| 2021/6/21 16:10 | 0.760 | 24.6 | 100.92 | 0.06 |
| 2021/6/21 16:20 | 0.760 | 24.6 | 100.90 | 0.06 |
| 2021/6/21 16:30 | 0.760 | 24.6 | 100.88 | 0.07 |
| 2021/6/21 16:40 | 0.763 | 24.6 | 100.90 | 0.06 |
| 2021/6/21 16:50 | 0.763 | 24.6 | 100.88 | 0.07 |
| 2021/6/21 17:00 | 0.767 | 24.6 | 100.88 | 0.06 |
| 2021/6/21 17:10 | 0.763 | 24.6 | 100.88 | 0.06 |
| 2021/6/21 17:20 | 0.767 | 24.6 | 100.90 | 0.06 |
| 2021/6/21 17:30 | 0.767 | 24.6 | 100.90 | 0.06 |
| 2021/6/21 17:40 | 0.767 | 24.6 | 100.90 | 0.07 |
| 2021/6/21 17:50 | 0.767 | 24.6 | 100.90 | 0.07 |
| 2021/6/21 18:00 | 0.762 | 24.7 | 100.90 | 0.07 |

|                 |       |      |        |      |
|-----------------|-------|------|--------|------|
| 2021/6/21 18:10 | 0.765 | 24.7 | 100.91 | 0.06 |
| 2021/6/21 18:20 | 0.765 | 24.7 | 100.91 | 0.07 |
| 2021/6/21 18:30 | 0.769 | 24.7 | 100.92 | 0.07 |
| 2021/6/21 18:40 | 0.769 | 24.7 | 100.92 | 0.07 |
| 2021/6/21 18:50 | 0.769 | 24.7 | 100.92 | 0.06 |
| 2021/6/21 19:00 | 0.769 | 24.7 | 100.92 | 0.07 |
| 2021/6/21 19:10 | 0.769 | 24.7 | 100.94 | 0.06 |
| 2021/6/21 19:20 | 0.773 | 24.6 | 100.94 | 0.07 |
| 2021/6/21 19:30 | 0.776 | 24.6 | 100.95 | 0.06 |
| 2021/6/21 19:40 | 0.776 | 24.6 | 100.98 | 0.06 |
| 2021/6/21 19:50 | 0.776 | 24.6 | 101.00 | 0.06 |
| 2021/6/21 20:00 | 0.776 | 24.6 | 101.01 | 0.07 |
| 2021/6/21 20:10 | 0.776 | 24.6 | 101.03 | 0.07 |
| 2021/6/21 20:20 | 0.776 | 24.6 | 101.04 | 0.06 |
| 2021/6/21 20:30 | 0.776 | 24.6 | 101.03 | 0.06 |
| 2021/6/21 20:40 | 0.776 | 24.6 | 101.03 | 0.06 |
| 2021/6/21 20:50 | 0.776 | 24.6 | 101.03 | 0.06 |
| 2021/6/21 21:00 | 0.776 | 24.6 | 101.04 | 0.06 |
| 2021/6/21 21:10 | 0.773 | 24.6 | 101.06 | 0.06 |
| 2021/6/21 21:20 | 0.773 | 24.6 | 101.06 | 0.06 |
| 2021/6/21 21:30 | 0.773 | 24.6 | 101.07 | 0.06 |
| 2021/6/21 21:40 | 0.778 | 24.5 | 101.07 | 0.06 |
| 2021/6/21 21:50 | 0.778 | 24.5 | 101.09 | 0.05 |
| 2021/6/21 22:00 | 0.778 | 24.5 | 101.09 | 0.06 |
| 2021/6/21 22:10 | 0.778 | 24.5 | 101.07 | 0.06 |
| 2021/6/21 22:20 | 0.775 | 24.5 | 101.07 | 0.06 |
| 2021/6/21 22:30 | 0.775 | 24.5 | 101.06 | 0.06 |
| 2021/6/21 22:40 | 0.775 | 24.5 | 101.04 | 0.06 |
| 2021/6/21 22:50 | 0.775 | 24.5 | 101.04 | 0.06 |
| 2021/6/21 23:00 | 0.775 | 24.5 | 101.03 | 0.06 |
| 2021/6/21 23:10 | 0.775 | 24.5 | 101.03 | 0.06 |
| 2021/6/21 23:20 | 0.775 | 24.5 | 101.01 | 0.06 |
| 2021/6/21 23:30 | 0.771 | 24.5 | 101.01 | 0.06 |
| 2021/6/21 23:40 | 0.771 | 24.5 | 101.00 | 0.06 |
| 2021/6/21 23:50 | 0.771 | 24.5 | 101.00 | 0.06 |
| 2021/6/22 0:00  | 0.771 | 24.5 | 100.98 | 0.05 |
