# Supplementary material
Source: MDPI journal article supplement (https://www.mdpi.com/2073-4395/11/10/2050)
Supplement: s1 [file s1]

Table S3. The nutrient contents of the plant under different flow rate

| Flow rate<br>(L/min) | Number | N contents (mg/g dw) |       | P contents (mg/g dw) |       | K contents (mg/g dw) |       | Ca contents (mg/g dw) |       | Mg contents (mg/g dw) |       | S contents (mg/g dw) |       |
|----------------------|--------|----------------------|-------|----------------------|-------|----------------------|-------|-----------------------|-------|-----------------------|-------|----------------------|-------|
|                      |        | Shoots               | Roots | Shoots               | Roots | Shoots               | Roots | Shoots                | Roots | Shoots                | Roots | Shoots               | Roots |
| 2                    | 2-1    | 50.20                | 45.13 | 9.56                 | 7.23  | 37.38                | 30.14 | 8.02                  | 5.29  | 5.29                  | 3.58  | 3.17                 | 3.95  |
|                      | 2-2    | 48.37                | 46.56 | 6.99                 | 6.87  | 31.00                | 30.78 | 8.11                  | 13.97 | 4.07                  | 4.33  | 3.63                 | 3.92  |
|                      | 2-3    | 49.85                | 40.40 | 8.50                 | 6.78  | 37.51                | 33.93 | 7.84                  | 5.32  | 4.36                  | 8.44  | 3.13                 | 3.51  |
|                      | 2-4    | 44.63                | 40.36 | 9.20                 | 8.71  | 57.83                | 38.93 | 8.26                  | 5.59  | 4.79                  | 15.34 | 4.27                 | 3.60  |
| 4                    | 4-1    | 47.31                | 47.38 | 8.92                 | 8.23  | 44.17                | 33.63 | 5.88                  | 3.36  | 4.58                  | 3.34  | 2.82                 | 3.19  |
|                      | 4-2    | 46.48                | 44.89 | 4.94                 | 5.99  | 51.27                | 40.48 | 6.26                  | 5.03  | 4.36                  | 6.52  | 3.29                 | 3.58  |
|                      | 4-3    | 47.47                | 40.15 | 10.94                | 7.61  | 52.52                | 30.40 | 4.91                  | 5.15  | 3.67                  | 4.60  | 2.84                 | 3.09  |
|                      | 4-4    | 56.98                | 43.60 | 10.46                | 7.84  | 61.97                | 29.37 | 5.67                  | 4.25  | 5.88                  | 5.01  | 4.32                 | 3.01  |
| 6                    | 6-1    | 39.61                | 39.42 | 11.58                | 7.64  | 64.01                | 32.74 | 6.95                  | 4.86  | 6.77                  | 2.76  | 4.74                 | 2.55  |
|                      | 6-2    | 41.28                | 40.50 | 11.22                | 7.29  | 48.60                | 26.95 | 9.17                  | 4.24  | 6.12                  | 4.77  | 3.41                 | 3.21  |
|                      | 6-3    | 43.03                | 39.45 | 7.68                 | 7.15  | 40.88                | 36.45 | 9.08                  | 5.74  | 6.37                  | 11.74 | 3.84                 | 2.79  |
|                      | 6-4    | 43.91                | 34.13 | 6.81                 | 4.86  | 34.39                | 19.55 | 7.73                  | 4.06  | 5.25                  | 8.14  | 3.11                 | 2.49  |
| 8                    | 8-1    | 45.99                | 38.27 | 4.96                 | 6.48  | 30.71                | 31.33 | 5.74                  | 3.97  | 4.05                  | 4.60  | 2.26                 | 2.90  |
|                      | 8-2    | 33.90                | 35.68 | 7.44                 | 8.02  | 27.13                | 26.74 | 2.55                  | 4.17  | 1.95                  | 8.93  | 1.59                 | 2.54  |
|                      | 8-3    | 44.31                | 45.05 | 4.99                 | 5.86  | 26.96                | 27.90 | 5.54                  | 5.53  | 4.21                  | 7.79  | 2.40                 | 2.37  |
|                      | 8-4    | 35.46                | 37.55 | 9.03                 | 6.21  | 42.05                | 34.35 | 5.77                  | 8.41  | 5.37                  | 11.59 | 3.02                 | 3.32  |
